# Supplementary material for: Genome-Wide Identification, Evolution and Expressional Analysis of OSCA Gene Family in Barley (Hordeum vulgare L.)
Source: MDPI journal article supplement (doi:10.3390/ijms232113027), 2022-10-27
Supplement: s1 [file s1]

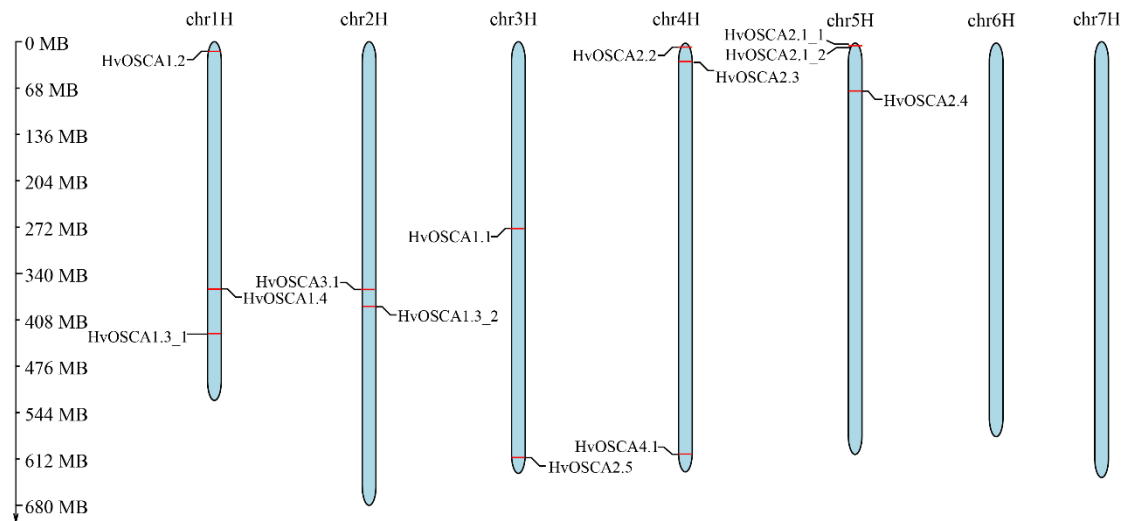

**Figure S1.** The schematic visualized physical position of *HvOSCA*s and its distribution on barley chromosomes.

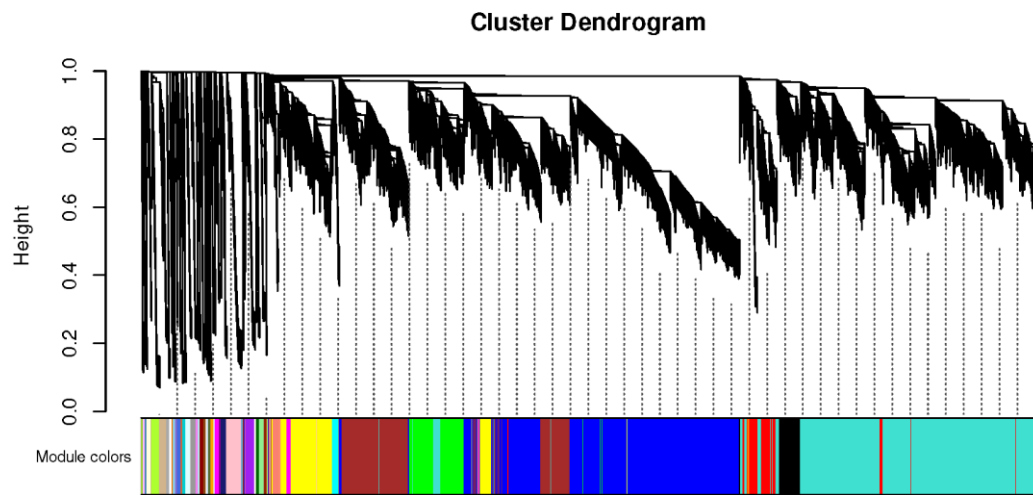

**Figure S2.** Weighted gene co-expression network analysis (WGCNA) of *HvOSCA*s under stress treatments

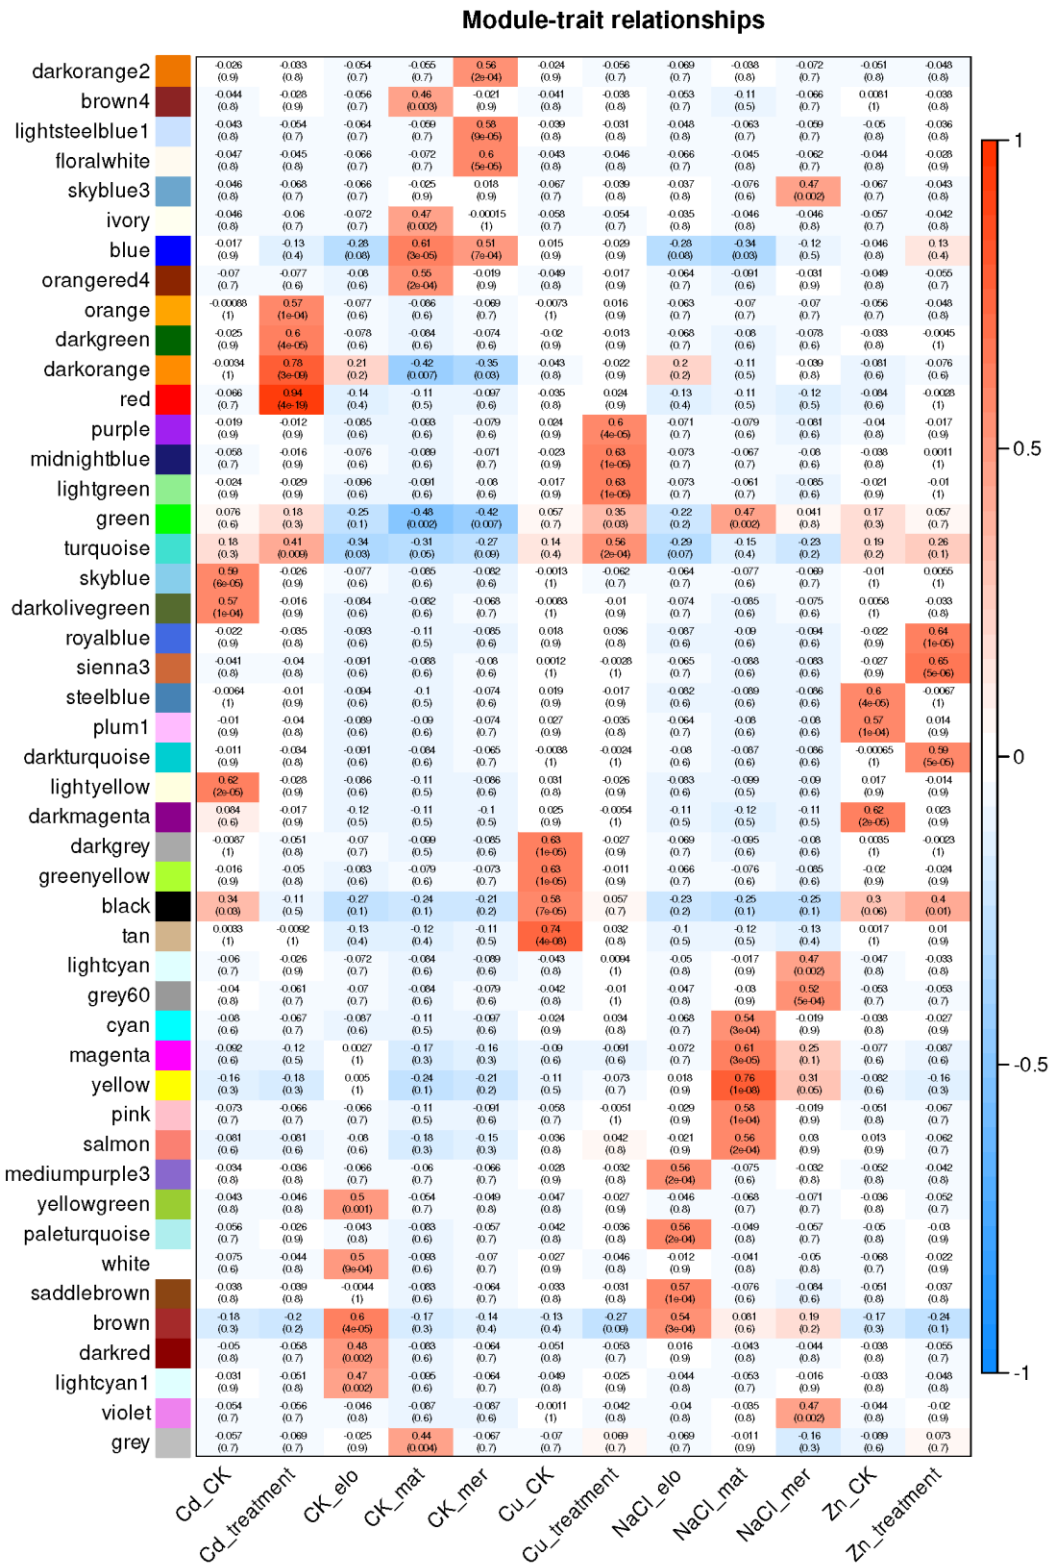

**Figure S3.** The heat map of module-treatment relationship. Each row represented a module eigengene, column represent a treatment. Each cell contains two data up for correlation coefficient and bottom for p-value. The heat map was coded by correlation

coefficient from -1 to 1 according color legend on the right. Simulated abiotic stress treatment include cold, salinity, and heavy metal ion treatment. cold stress treatment: CK of cold(cold\_CK), cold (4°C) treatment (Cold\_treatment), salt treatment of *H.vulgare* root (dissected and sampled the *H.vulgare* root according the organizational structure for meristem zone, elongation zone and mature zone). CK of meristem zone (CK\_mer), meristem zone under salt treatment (NaCl\_mer), CK of elongation zone (CK\_elo), elongation zone under salt treatment (NaCl\_elo), CK of maturation zone (CK\_mat) and maturation zone under salt treatment (NaCl\_mat). Heavy metal ion (cadmium ion, copper ion and zinc ion) stress. control of cadmium ion stress (Cd\_ck), cadmium ion treatment (Cd\_treatment), control of copper ion treatment (Cu\_CK), copper ion treatment (Cu\_treatment), control of zinc ion stress (Zn\_CK) and zipper ion treatment(Zn\_treatment).

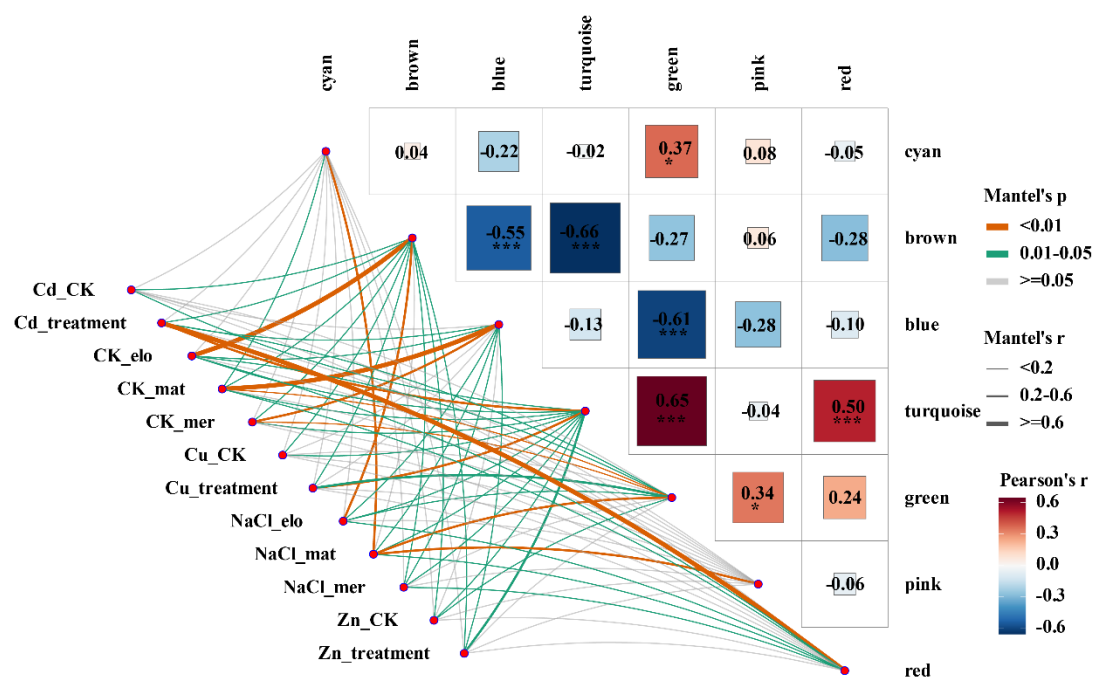

**Figure S4.** Correlations between 7 modules and simulated abiotic stresses treatment included cold, salinity, and heavy metal ion treatment. cold stress treatment: CK of cold(cold\_CK), cold (4°C) treatment (Cold\_treatment), salt treatment of *H.vulgare* root (dissected and sampled the *H.vulgare* according the organizational structure of root for meristem zone, elongation zone and mature zone). CK of meristem zone (CK\_mer), meristem zone under salt treatment (NaCl\_mer), CK of elongation zone (CK\_elo), elongation zone under salt treatment (NaCl\_elo), CK of maturation zone (CK\_mat) and maturation zone under salt treatment (NaCl\_mat). Heavy metal ion (cadmium ion, copper ion and zinc ion) stress. control of cadmium ion stress (Cd\_ck), cadmium ion treatment (Cd\_treatment), control of copper ion treatment (Cu\_CK), copper ion treatment (Cu\_treatment), control of zinc ion stress (Zn\_CK) and zipper ion treatment (Zn\_treatment).
