# Supplementary material for: Genome-Wide Identification, Evolution and Expressional Analysis of OSCA Gene Family in Barley (Hordeum vulgare L.)
Source: Int J Mol Sci. 2022 Oct 27;23(21):13027. doi: 10.3390/ijms232113027 (PMC9653715; doi:10.3390/ijms232113027)
Supplement: Supplementary file 1 [file ijms-23-13027-s001.zip › Supplementary file 2.xlsx]

## Sheet: Table S1
Table S1. Characteristics and biochemical property of HvOSCAs.
Gene Name	Gene ID	Chr	Gene length (bp)	CDS length (bp)	Protein Length (aa)	Isoelectric Point	Molecular Weight (kDa)	Grand Average of Hydropathicity	Aliphatic index	Subcellular Location
HvOSCA1.1	HORVU.MOREX.r2.3HG0218160.1	chr3H	26795	2189	729	7.26	83282.1	0.174	105.64	InnerMembrane
HvOSCA1.2	HORVU.MOREX.r2.1HG0005560.1	chr1H	5121	2301	766	9.13	88146.1	0.161	105.37	InnerMembrane
HvOSCA1.3_1	HORVU.MOREX.r2.1HG0051150.1	chr1H	5260	2304	767	6.7	87580	0.139	101.32	InnerMembrane
HvOSCA1.3_2	HORVU.MOREX.r2.2HG0129010.1	chr2H	3936	2307	768	7.31	87364.6	0.131	102.8	InnerMembrane
HvOSCA1.4	HORVU.MOREX.r2.1HG0042080.1	chr1H	5266	2400	799	9.07	92554.5	0.027	95.78	InnerMembrane
HvOSCA2.1_1	HORVU.MOREX.r2.5HG0350440.1	Chr5H	4169	2346	781	9.2	88565.8	0.197	106.54	InnerMembrane
HvOSCA2.1_2	HORVU.MOREX.r2.5HG0350450.1	Chr5H	3967	2304	767	8.86	86915.3	0.196	103.06	InnerMembrane
HvOSCA2.2	HORVU.MOREX.r2.4HG0278490.1	Chr4H	6004	2337	778	9.24	87930.2	0.232	104.1	InnerMembrane
HvOSCA2.3	HORVU.MOREX.r2.4HG0282660.1	Chr4H	3439	2238	745	8.7	85655.9	0.196	100.44	InnerMembrane
HvOSCA2.4	HORVU.MOREX.r2.5HG0363570.1	Chr5H	6872	2097	698	8.76	79038.8	0.253	104.41	InnerMembrane
HvOSCA2.5	HORVU.MOREX.r2.3HG0267300.1	Chr3H	4057	2133	710	8.78	79921.2	0.177	96.94	InnerMembrane
HvOSCA3.1	HORVU.MOREX.r2.2HG0126160.1	chr2H	4246	2178	725	9.09	81409.1	0.263	105.3	InnerMembrane
HvOSCA4.1	HORVU.MOREX.r2.4HG0340290.1	Chr4H	2385	2384	794	7.22	89524.2	0.216	100.53	InnerMembrane

## Sheet: Table S2
Table S2. The chromosome location of HvOSCAs.
Gene name	Gene ID	Start(MB)	End(MB)	Location of chromosome
HvOSCA1.1	HORVU.MOREX.r2.3HG0218160.1	274.68	274.71	chr3H
HvOSCA1.2	HORVU.MOREX.r2.1HG0005560.1	13.66	13.66	chr1H
HvOSCA1.3_1	HORVU.MOREX.r2.1HG0051150.1	425.16	425.16	chr1H
HvOSCA1.3_2	HORVU.MOREX.r2.2HG0129010.1	385.42	385.42	chr2H
HvOSCA1.4	HORVU.MOREX.r2.1HG0042080.1	360.12	360.13	chr1H
HvOSCA2.1_1	HORVU.MOREX.r2.5HG0350440.1	3.89	3.89	chr5H
HvOSCA2.1_2	HORVU.MOREX.r2.5HG0350450.1	3.89	3.9	chr5H
HvOSCA2.2	HORVU.MOREX.r2.4HG0278490.1	7.85	7.86	chr4H
HvOSCA2.3	HORVU.MOREX.r2.4HG0282660.1	24.85	24.85	chr4H
HvOSCA2.4	HORVU.MOREX.r2.5HG0363570.1	69.73	69.74	chr5H
HvOSCA2.5	HORVU.MOREX.r2.3HG0267300.1	605.74	605.75	chr3H
HvOSCA3.1	HORVU.MOREX.r2.2HG0126160.1	361.06	361.07	chr2H
HvOSCA4.1	HORVU.MOREX.r2.4HG0340290.1	596.79	596.79	chr4H

## Sheet: Table S3
Table S3. The full-length sequences of OSCA proteins in barley, wheat, rice, A. thaliana and maize.
>HvOSCA1.1
MATIQDIGVSAAINILSAVIFLLAFAFLRLQPINDRVYFPKWYLKEDELISHAGLDSAVYLRIYLTGLKIFVPITILAFLVLVPVNWTNDTLEGLKVEHSDIDKLSISNIPFGSKRFIAHLTMAYVFTFWTCYVLLREYEIVATMRLRFLASEKRRPDQFTVLVRNIPPDPDESIGELAEHFFLVNHPDHYLTHQVVYNANKLANLVKEKKKMQNWLDFYQLKYERNASKRPTVKTGFLGCFGSKVDAVEHYTSEIERIEKEEAEEREKIVKDPKLVVPAAFVSFRSRWGAAVCAQTQQTSNPTVWLTEWAPEPRDVYWDNLSIPIVHLTVRRLIIAVAFFFLNFFYVIPIAFVQSLANIEGIEKAVPFLKPIIEMPAIKSFIQGFLPGIALKIFLILL…
>HvOSCA1.2
MATIYDIAVGAAFNIVTAVAFLLLFAFLRLQPVNDRVYFPKWYLKGTRASPASAGATVAAAKYINLDMRSYLKFLSWMPAALKMPDDELIQHAGLDSVIYLRIYRTGLKIFVPITILAFAVLVPLNWTNDTLESLKVVHSDIDKLSISNIPYGSKRFVAHLVMAYVFTFWTCYVLMKEYQIVARMRLRFLALEKRRPDQFTVLVRNIPSDPDESVSELVEHFFLVNHPGHYLKHQVVYNTNKLAGLLEKKKQMQNWLDYYQLKFGRKSERPTTKTGFLGCFGSDVDAIDYYKSEIEKIQKEEAEEHKKVMKDPKSIMPAAFVSFRSRWSAAICAQTQQTSNPTVWLTEWAPEPRDVYWNNLSIPFVSLTVRRLIIGVAFFFLNFFYVIPIALVQTLANV…
>HvOSCA1.3_1
MGSLNEIGVAAGINISSALGFLLAFAILRIQPINDRVYFPKWYLKGTRSSPRHIGAGFSKFVNADLSTYLRFLNWMPAALQMPEPELIEHAGLDAAVYVRIYLLGLKIFVPIALLAFIVLVPVNWTSGTLEHEKDLNYDEIDKLSISNLGKGSKWFWAHIGMSYVFTFWTFYVLFHEYKVITTMRLRFLANQSRRPDQFTVLVRNVPPDPDETVSEHVEHFFAVNHRDHYLSHQIVYNANALAGLVEKKKGLKNWLVYYENQHAHNPAKTPTMKTGLWGLWGRKVDAIEYYKAAIEELCKQEDEERQKVMSDPNAIMPAAFVSFKSQWGAAVCAQTQQTSNPTVWLTEWAPEPRDVYWPNLAIPFVELSVRRLIIAVALFFLTFFFMIPIAFVQSLANL…
>HvOSCA1.3_2
MGSLNDIGVAAGINILSAVGFLLVFAVVRIQPINDRVYFPKWYLKGTRSSPRHIGTVLSKFVNANVSTYLRFLNWMPAALKMPEPELIEHAGLDSAVYVRIYLLGLKIFVPITMLAFAVLVPVNWTSATLGDDGEGLSYDEIDKLSISNLGPGSKRFWVHIGMAYVFTFWTFYVLYHEYKVITTMRLHFLANQNRRPDQFTVLVRNIPADPDETVGEHVEHFFAVNHREHYLSHQVVYNANALASLVEKKKGLQNWLVYYENQHAKNPEKELTIKTGLWGLWGEKVDAIEHYKTTIKELCKQEDEERQKVISDPKAIMPAAFVSFNCQWGAAVCAQTQQTSNPTVWLTEWAPEPRDVYWPNLAIPFVELSIRRLIMAVALFFLTFFFMIPIAVVQSAAN…
>HvOSCA1.4
MATLQDLGVSAFINILGAFVFLLLFAVLRIQPINDRVYFPKLYIAGKRGAGDHRGARRVINLNLCTYFKFLSWVPGALRMGQTELIHHAGLDSAVYLRIYTLGLKIFLPVMVVALLVLIPVNVSGGTLLNLRKDVMFSDIDKLSISNVSPGSNRFFIHLLMAYVFTFWTCFMLYKEYSNVAFMRLHFLASQKRCADQFTVIVRNIPRVSSHSTSETVDEFFRRNHPDHYLGQQAVYNANRYAKLVKQKERLQNWLDYYQLKFERHPDKRPTGRTGCFGFCGRQVDQIDYYRATISELDKRIASERQRVLNDPKAVMPVSFVTFDSRWGAAVCAQTQQSKNPTQWLTNWAPEPRDVYWQNLAIPFFSLSIRKFLISIAVFALVFFYMIPIAFVQSLANLE…
>HvOSCA2.1_1
MKISALLTSAGINIGLCVLFLSLYSVLRKQPANVRVYFGRRISEEHSRLREAFILERFVPSTGWIVKALRYTEEEVLAAAGLDAVAFNRMLVFSIRIFSLAALLCVFGILPLHYYGKNIQHLRIPSEDLDIFTIGNVEVRSRWLWVHCLVLYIISGVACILLYLEYRHIARLRLLHLKRATPNPGQFTVLVRGIPKTKKESCSSSVDDFFTKYHASSYLFHQVVYKAGKVQKIMTGAKKACRKLKHFTDNTVDQSCKAITYRCCLCGASSNSFQLLPTNEVVPSRVKADLDDSSLDIDNEECAAAFVFFKTRYGALVASDVLQTSNPTKWVTDLAPEPSDVYWSNIWLPYKQLWIRRIATLIGSIVFMLLFLAPVTFINGLSQLDQLQKRLPFLNGILK…
>HvOSCA2.1_2
MKISALMTSAGINIGLCVLFWSLYSVLRKQPAFVRVYFGRRIAEENRLLREAFILERFVPSTGWIVKALQCTEEDLLAAAGLDAVAFNRMLVFSIRIFSLAAILCLFGILPVHYLARKTQHLEIPSEQLHMFTVQNVEVQSRWLWVHSVVLYIISGVACFLLYVEYGHIARLRLLHLKRTTLNPGQFTVLVRGIPKTANESCSSDVDDFFTKYHASSYLFHQVIYKAGKVQKIMTGAKKACGKLDHSTSTDTTLDQSRKAITYPCCLCGASSNSFQLLPTDEVAKNIDNEECAAAFVFFKTRYGALLASQALQTSNPTKWVTDLAPEPDDMYWSNIWLPYKQLWIRRIATLLGSLVFSFLFLIPVTFIQGLSQLDQVHRKLPFLNGLLKQPYMSQIITG…
>HvOSCA2.2
MKVGALLTSAGINIGLCILFLSFYSILRKQPQNVKVYFGRRIAEQHKRLRGAFILERFVPSPSWIVRSLQCTEDEILSTAGLDAVVFNRVLVFSIRIFSLAAILCLFGVLPLNYFGQDMLHEQLPSASLETFTIGNMQEKSKWLWVHCVVLYIISGVACFLLYMEYKHIARLRLLHLVRTKTKASHFTVLVRGIPRSTHESFNSAVESFFTTYHAPSYLSHQVVYKVGKLQKIVTGAKKVYRKFKHLKDTTVDQTCRSVTYRCCLCGVSSNSFQLLPTEEQERGKPCVKNSNLNLPAEECAAAFVFFKTRYAALIVSKILQTSNPMKWVTSLAPERNDMYWSNLWLPYKQLWIRRIATLLGSVVFMFIFLVPVTFIQGLTQLEQLQQRLPFLKGLLKGK…
>HvOSCA2.3
MEFSALLTSAGINIALCILYLSLYSILRKQPHNFGVYFGRRLAEEKFREQVDYFSFERLLPTAGWLVKAYWCTEDEIRRVAGLDSVVFLRLFIFSIRIFSITTLICVFGVLPVNYHGQEMAHTRVPAESLNVFTIANLKEGSRMLWVHCTALYVITISACILLFQEYRYISRKRLAHITGSTPNPGHFAVLVRSIPKSHNELLDDTIRNFFVNYHGSSYLSHQMIYRKGKLQNFVDSAERAYRKFVRVKLSVFDQNVRSSLNRCGLCGVRASSFQLYRNKFVDAKKSDLTDPEVVEAQKDCPGAIVFFKTRYAAIVASQVLQSSNPMLWVTNLAPEPRDVYWSNLWIPYRQIWLRKIATLAASVFFMFVFIVPVAFVQSMMQLEQLKQMFPNLRGALKT…
>HvOSCA2.4
MIVSALATAVGVNLGLTVLLASTYSLLRRRPPFVSVYAPRRPYAPLGSWLAAAWRRSEDDIHAAAGLDGVVFVRIFVFSIRVFAVVAVVGVGVLMPINFLGDQLRLIDFTDLPSKSVDVLSISNVQDGSNKLWLHFSAVYIITGVACYLLYYEYKYISGKRLEYFMTSKPLPQYFTVLVRAIPITDGGSVSDAVDKFFKEYHPSTYLSHTVVHQTGRLRRLLNETEIIWRKLKNIKYVPHVSHIENRPKKFLGLFGRNNPVRKYQKRLEDLEENVRMEQSDATRRREIPAAFVSFKSRYASANAIYVRQSDNPTEWQTEHAPDPHDVYWPSFSTSFMEQWISKFVVFVASVLLIIVFLLVVAFIQGLTYMNQLEAWLPFLRNILEIAIVSQLVTGYLPS…
>HvOSCA2.5
MDAEGLLASAAINLGLALVALSLFSMLKKQPGNAPVYLPRRMAGAGGSGGGVLPLGTGRLTPSFRWIRAAFGINDDDVLRRHGLDALAVIRLFKFGIKCFSVCSVVGVLVLAPVNYTSEGPSDPKRQNSMELFTVSNVPKGSDRLWVHFSCLCFISFYVVYLLHKEYKEMSHKRIEHLKYHRKRPDQFTILVQGIPLCTDHGTYGCNADHFFSKHYQTYQSYQILHDNGNIESLQKLASSLEKQIERKRNTRRCNFWQWIWFKFTTGPIDARSQEQKLKEVHQSIRILQCKNMLKQKELPVAFVSFKSRLEAAQAAETQQHINPLSLVTRYAPEPTETIWSNLAIPFYRLAAYKVGVFIAAFLLTVFFTIPVTAVQGIVQFEKIEKWFPPARAVRLIPG…
>HvOSCA3.1
MDISSFLTSLLTSFVIFVVLVLLFTWLSRRPGNAPVYYPSVLLRGLDPWEGRGRGTRSPVGWIRQAFAASEPDVVAAGGLDAAVYLVFLSSVLAILVFSAIVLLPVLLPVAGTDHALEDSTGRVPPNVTDFERLALGNVKDESARLWAFIFAVYWVSFVTYFILWRSYKHVSNLRAAARSTSDVKPEEFAMLVRDVPVPPPDQTIKDSVDSYFRALHPDTFYKAMVVTDIKKADKIFQEIEGHKQKIAHAEAVYAESKTTNRPEGTRPTHRTGFLGLIGKKVDTLEYCSEKIKELLPKLEDEQKSTLSDKQQRAAFVFFNSRAAAASASQTLHAQMFDEWTVTEAPEPREVIWTNLPKKIYDRQTRQTVVYLIVFVTVVFYMIPITAISAVTTLQKLRE…
>HvOSCA4.1
MGPGAPSPEDAAGGEPEAWYGSIQYLVNISAVGAASCVLLFLLVKLRFDHRRIPGPSALAAKLLAVYHATAPQIALHCGADAAQFLLFERASFLVLAAVSAAAFSAALPLNLLAGDAAIADQFAATTISHIPRASPLLWLHLLLTAAVVAIAHLGISRMEDALRITRFRDGNGNPSDPNSSSVAVFTIMIQGIPRTLAADKTPLKDYFEHKYPGKVYRVIVPFDLCTLEYLADQWGKVRNKISWLEARMDARSLFDEFVQDESGHLEAHWLVRRCKELWAMAAQRFGFTDDERLRKLQTSKLVIGSRLSDYKEGRAPGAGIAFVVFKDVYTANKAVRDFRMERKKTPIGRFFPVMELQLERSRWKVERAPPASDIYWNHLGMNKTSLALRRIAVNTCLI…
>TaOSCA24
MEFSALLTSAGINIALCILYLSLYSILRKQPHNFRVYFGRRLAEEKFRQQVDYFSFERLLPTAGWLVKAYWCTEDEIRRVAGLDSVVFLRLFIFSIRIFSITTLICVFGVLPVNYNGQEMAHTRVPAESLNVFTIANLKEGSSKLWVHCTALYVITISACILLFQEYRYISRKRLAHITGSTPNPGHFAVLVRSIPKSHNELLDDTIRNFFLNYHGSSYLSHQMIYRKGKLQNFVDSAERAYRKFVRVKLSAFDQNMRSSLNRCGLCGVQASSFELYRNKFVEAKKSDLTDPEVVEAQKDCPGAIVFFKTRYAAIVASQVLQSSNPMLWVTNLAPEPRDVYWSNLWIPYRQIWLRKIATLAASVFFMFVFIVPVAFVQSMMQLEQLKQMFPNLRGALKT…
>TaOSCA17
MGSLNDIGVAAGINILSAVGFLLVFAVVRIQPINDRVYFPKWYLKGTRSSPRHIGNVLSKFVNADVSTYLRFLNWMPAALKMPEPELIEHAGLDSAVYVRIYLLGLKIFVPITVLAFSVLVPVNWTSATLGDDEEGLSYDQIDKLSISNLGQGSKRFWVHIGMAYVFTFWTFYVLYHEYKVITTMRLHFLANQNRRPDQFTVLVRNIPADPDETVGEHVEHFFAVNHREHYLSHQVVYNANTLASLVEKKKGLQNWLVYYENQHAKNPEKELIIKTGLWGLWGEKVDALQHYKTTIEELCKQEDEERQKVISDPKAIMPAAFVSFNSQWGAAVCAQTQQTSNPTVWLTEWAPEPRDVYWPNLAIPFVELSVRRLIMAVALFFLTFFFMVPIALVQSVAN…
>TaOSCA25
MKVGALLTSAGINIGLCILFLSFYSVLRKQPQNVKVYFGRRIAEQHKRLRGAFILERFVPSPSWIVRSLQCTEDEILSTAGLDAVVFNRVLVFSIRIFSLAAILCLFGVLPLNYFGQDMQHERIPSASLETFTIGNMKEKSIWLWVHCVVLYIISGVACFLLYMEYKHIARLRLLHLVRTTTNRSHFTVLVRGIPKSTHESFNNAVESFFTTYHAPSYLSHQVVYKVGKLQKIVTGAKKVYRKFKHFKGTTVDQTCRSVTYRCCLCGVSSNSFQLLPTEEQEREKPCVKNSNLNLPAEECSAAFVFFKTRYAALIVSKILQTSNPMKWVTSLAPEPKDMYWSNLWLPYKQLWIRRIATLLGSIVFMFIFLVPVTFIQGLTQLEQLQQRLPFLKGLLKGK…
>TaOSCA7
MGSLNEIAVAAGINISSALGFLLAFAILRIQPINDRVYFPKWYLKGTRSSPRHLGAGFSKFVNADLSTYLRFLNWMPAALQMPEPELIEHAGLDAAVYVRIYLLGLKIFVPIALLAFIVLVPVNWSSGTLEHEKDLNYDEIDKLSISNLGKGSKRFWIHIAMAYVFTFWTFYVLFHEYKVITTMRLRFLANQSRRPDQFTVLVRNVPPDPDETVSEHVEHFFAVNHRDHYLSHQIVYNANALVGLVEKKKGLKNWLVYYENQHAHNPAKKPTMKTGLWGLWGRKVDAIEYYKAEIAELCKQEDVERQKVMSDPNAIMPAAFVSFKSQWGAAVCAQTQQTSNPTVWLTEWAPEPRDVYWPNLAIPFVELSVRRLIIAVALFFLTFFFMIPIAFVQSLANL…
>TaOSCA21
MDIPSFVTSILTSLAVFVVLVLVFTWLSRRPGNATVYYPSLLLRGLDPWEGRGRGTRSPVGWIRQAFTASEPDVVAAGGVDAAVYLVFLSSMFAILAFAGIVLLPVLLPIAGTDNALEDSTGRMPPNVTHFEILSLANIEDRSMRLWAFISAVYWVSFVTYFILWRSYKHVSNLRAAARSTSGVKPQEFAMLVRDVPIPPPDQTIKDSVDSYFRALHPDTFYKAMVVTEITKADKIFQEIEGHKRKIAHAEAVYAESKTANRSEGTRPTHKTGFLGLIGKKVDTIEHTRQTVVYLIVFVTVAFYMIPITAISAVTTLEKLREKLPFLKVVVDQPFVKTVLQAYLPQIALIVFLAVLPTLLVSLSKSEGIPSQSHVVRAASGKYFYFIVFNVFIGYAVGS…
>TaOSCA38
MKISALLTSAGINIGLSVLFLSLYSVLRKQPANVRVYFGRRISEEHSRLREAFILERFVPSTGWIVKALRYTEEELLAAAGLDAVAFNRMLVFSTRIFSLAALLCVFGILPLHYHGQNIQHLRIPYEDLDIFTIGNVEKRSRWLWVHCLVLYIISGVACILLYLEFRHIARLRLLHLKRATPNPGQFTVLVRGIPKTKKESCSSAVDDFFTKYHASSYLFHQIVYKTGKVQKIMTGAKKACRKLKNFTDTTVDQSCKAITYRCCLCGASSNSFQLLPTDEVVPSKGKVDLDDSSLNIDNEECAAAFVFFKTRYGALVASDVLQTSNPTKWVTDLAPEPNDVYWSNIWLPYKQLWIRRIATLLGSVVFMLLFLAPVTFINGLSQLDQLQKRLPFLNGILK…
>TaOSCA12
MDISSFVTSLLTSFVIFVVLVLVFTWLSRRPGNAPVYYPSVLLRGLDPWEGRGRGTRSPVGWIRQAFTASEADVVAAGGVDAAVYLVFLSSVLAILVVSGIVLLPLLLPLAATDHALENSAGFKNGKEAQNFTIIERLALGNVQKKSMRLWAFILSVYWVSFVTYLVLWKSYKHVSNLRAAARSTSDVKPEEFAVLVRDVPIPPPDQTIKDSVDSYFRVLHPDTFYKAMVVTDNKEADKIFQEIEGHKHKIAHAEAVYAESKKGNKPEGTKPTHRTGLLGLIGKKVDTMEYCNGEIKELLPKLEAEQKSTLHDKQQRAAIVFFNSRAAAASASQTLHAQLFDKWTVTEAPEPRDMIWSNLPKKIYERHTRQTVVYFIVFLTVFFYTIPITAVSAVTTLE…
>TaOSCA28
MEFSALLTSAGINIALCILYLSLYSILRKQPHNFRVYFGRRLAEEKFREQVDYFSFERLLPTAGWLVKAYWCTEDEIRRVAGLDSVVFLRLFIFSIRIFSITTLICVFGVLPVNYHGQEMAHVRVPAESLNVFTIANLKEGSSKLWVHCTALYVITISACILLFQEYRYISRKRLAHITGSTPNPGHFAVLVRSIPKSHNELLDDTIRNFFLNYHGSSYLSHQMIYRKGKLQNFVDSAERAYRKFVRVKLSVFDQNVRSSLNRCGLCGVQASSFELYRNKFVEAKKSDLTDPEVVEAQKDCPGAIVFFKTRYAAIVASQVLQSSNPMLWVTNLAPEPRDVYWSNLWIPYRQIWLRKIATLAASVFFMFVFIVPVAFVQSMMQLEQLKQMFPNLRGALKT…
>TaOSCA13
MGSLNDIGVAAGINILSAVGFLLVFAVVRIQPINDRVYFPKWYLKGTRSSPRHIGNVLSKFVNADVSTYLRFLNWMPAALKMPEPELIEHAGLDSAVYVRIYLLGLKIFVPITVLAFAVLVPVNWTSATLGDDEEGLSYDQIDKLSISNLGPGSKRFWVHIGMAYVFTFWTFYVLYHEYKVITTMRLHFLANQNRRPDQFTVLVRNIPVDPDETVGEHVEHFFAVNHREHYLSHQVAYNANALASLVKKKKGLQNWLVYYENQHAKNPEKELTIKTGLWGLWGEKVDALQHYKTTIEELCKQEDEGRQKVISDPKAIMPAAFVSFNSQWGAAVCAQTQQTSNPTVWLTEWAPEPRDVYWPNLAIPFVELSIRRLIMAVALFFLTFFFMVPIALVQSVAN…
>TaOSCA39
MIVSALATAVGVNLGLTVLLVSAYSLLRRRPPFVSVYAPRRPYAPLESWLAAAWRRSEDDIHAAAGLDGVVFVRIFVFSIRLFAVVAVVGVGVLMPINFMGDQLRLIDFTDLPSKSVDVLSISNVQDGSNKLWLHFSAVYIITGVACYLLYYEYRYISDKRLEYFMTSKPLPQYFTVLVRAIPITDGGSVSDAVDKFFKEYHSSTYLSHTVVHQTGKLRRLLNETEIMWRKLKNLKYVPHRPSTDNPPKKFLGLFGRNNPGKYQKRLEDLEENVRMEQSDATRRREIPAAFVSFKSRYASANAIYIRQSDNPTEWQTEHAPDPHDVYWPSFSTSFMERWISKFVVFVASVLLIIVFLLVVGFIQGLTYMDQLEAWLPFLRNILEIAIVSQLVTGYLPSV…
>TaOSCA26
MKVGALLTSAGINIGLCILFLSFYSVLRKQPQNVKVYFGRRIAEQHKRLRGAFILERFVPSPSWIVRSLQCTEDEILSTAGLDAVVFNRVLVFSIRIFSLAAILCLFGVLPLNYFGQDMRHERIPSASLETFTIGNMKEKSIWLWVHCVVLYIISGVACFLLYMEYKRIARLRLLHLVRTTSKHSHFTVLVRGIPKSTHESFNSAVESFFTTYHAPSYLSHQVVYKVGKLQKIVTGAKKVYRKFKHFKGTTVDQTCRSVTYRCCLCGVSSNSFQLLPTEEQERGKPCVKNSNLNLPAEECAAAFVFFKTRYAALIVSKILQTSNPMKWVTSLAPEPKDMYWSNLWLPYKQLWIRRIATLLGSIVFMFIFLVPVTFIQGLTQLEQLQQRLPFLKGLLKGK…
>TaOSCA11
MGSLNEIAIAAGINISSALGFLLAFAILRIQPINDRVYFPKWYLKGTRSSPRHIGAGFSKFVNADLSTYLRFLNWMPAALQMPEPELIEHAGLDAAVYVRIYLLGLKIFVPIALLAFIVLVPVNWSSGTLEHEKDLNYDEIDKLSISNLGKGSKRFWIHIGMAYVFTFWTFYVLFHEYKVITTMRLRFLANQSRRPDQFTVLVRNVPPDPDETVSEHVEHFFAVNHRDHYLSHQIVYNANALAGLVEKKKGLKNWLVYYENQHAHNPAKKPTMKTGLWGLWGRKVDAIEYYKAEIEELCKQEDVERQKVMSDPNAIMPAAFVSFKSQWGAAVCAQTQQTSNPTVWLTQWAPEPRDVYWPNLAIPFVELSVRRLIISVALFFLTFFFMIPIAFVQSLANL…
>TaOSCA36
MGPGAPSPEDAAGGEPEAWYGSIQYLVNISAVGAASCVLLFLLVKLRFDHRRIPGPSALAAKLLAVYHATAPQIALHCGADAAQFLLFERASFLVLAAVSAAAFAAALPLNLLAGDAAIADQFAATTISHIPRASPLLWLHLLLTAAVVAIAHLGISRMEDALRITRFRDGNGNPSDPNSSSVAVFTIMIQGIPRALAADKAPLKEYFEHKYPGKVYRVIVPFDLCTLEYLADEWGKVRNKISWLEAKMDARSLFDEFVQDESGQLEAHWLVRRCKELWAMTAQRFGFTDDERLRKLQTRKLVIGSRLSDYKEGRARGAGIAFVVFKDVYTANKAVRDFRMERKKTPIGRFFPVMELQLERSRWRVERAPPASDIYWNHLGMNKTSLALRRIAVNTCLI…
>TaOSCA6
MATLQDLGVSAFINILGAFVFLLLFAVLRIQPINDRVYFPKLYIAGKRAADHRGARRAINLNLCTYFKFLSWVPGALRMTQTELIHHAGLDSAVYLRIYTLGLKIFLPVMVVALLVLIPVNVSGGTLLNLRKDVMFSDIDKLSISNVSPGSNRFFIHLLMAYVFTFWTCFMLYKEYSNVAFMRLHFLASQKRCADQFTVIVRNIPRVSSHSTSEAVDEFFRRNHPDHYLGQQAVYNANRYAKLVKQKERLQNWLDYYQLKFERHPEKRPTGRTGCFGFCGRQVDQIDYYRARISELDKRIASERHRVLNDPKAVMPVSFVTFDSRWGAAVCAQTQQSKNPTQWLTNWAPEPRDVYWQNLAIPFFSLSIRKFLISIAVFALVFFYMIPIAFVQSLANLEG…
>TaOSCA1
MATIKDIGVGAAFNIVTATIFLLIFAFLRLQPINDRIFFPKWYLKGMRDSPSSAGAAVTKYVNLNVRSYLKFLSWMPAALKMPEEELIEHAGLDSVVYLRIYLTGLKIFVPITILAFAVLVPVNWTNDTLDDLKVVHSDIDNLSISNIPHGSKRFIAHLVMAYVFTFWTCYVLKNEYERVATMRLRFLASEKRRPDQFTVLVRNIPPDPDESVSELVEHFFLVNHPDHYLKHQTVYNANKLADLVEKKKKMRNWLDYYQNKLERKSKRPTTKTGFLGCFGSEVDAIDHCKSEIEKIGKEEAEERKKVMKDPKSIMPAAFVSFRSRWGAAVCAQTQQTSNPTLWLTEWAPEPRDVYWSNLSIPFVSLTVRRLIIGVAFFFLNFFYVIPIAFVQTLANLEG…
>TaOSCA35
MIVSALATAVGVNLGLTVLLVSAYSLLRRRPPFVSVYAPRRPYAPLESWLAAAWRRSEDDIHAAAGLDGVVFVRIFVFSIRLFAVVAVVGVGVLMPINFMGDQLQLIDFTDLPSKSVDVLSISNVQDGSNKLWLHFSAVYIITGVACYLLYYEYRYISGKRLEYFMTSKPLPQYFTVLVRAIPITDGGSVSDAVDKFFKEYHSSTYLSHTVVHQTGKLRRLLNETEIMWTKLKNLKYVPQRPSADNPPKKFLGLFGRNNPIGKYQKRLADLEENVRMEQSDATRRQEIPAAFVSFKSRYASANAIYIRQSDNPTEWQTEHAPDPHDVYWPSFSTSFMERWISKFVVFVASVLLIIVFLLVVGFIQGLTYMEQLEAWLPFLRNILEIAIVSQLVTGYLPS…
>TaOSCA34
MKISALMTSAGINIGICVLLWSLYSVLRKQPAFVRVYFGRRIAEENRLLREAFILERFVPSTGWIVKALQCTEEELLAAAGLDAVAFNRMLVFSIRIFSLAAILCLFGILPVHYFGRKMHRLEISSEQLHMFTVGNVEVQSRWLWVHSIVLYIISGVACFLLYVEYGHIARLRLLHLKRATLNPGQFTVLVRGIPKTENESCSSDVDDFFTKYHASSYLFHQVVYKAGKVQKIMTGAKKACGMSDPSTDTTLDQRCKAVTYPCCLCGASSDSFQLLPTDEVAKNIDKKECAAAFVFFKTRYGALVASEALQTSNPTKWVTDLAPEPDDVYWSNIWLPYKQLWIRRIATVLGSLVFLVLFVVPVAFIQGLSQLDQLQKKLPFLDGLLKKPYMSQIITGYL…
>TaOSCA19
MATIQDIGVSAAINILSAVIFLLAFAFLRLQPINDRVYFPKWYLKGSRQSPSHGGAFVRKFVNLDMRSYLKFLSWMPAALQMPEDELISHAGLDSAVYLRIYLTGLKIFVPITILAFLVLVPVNWTNDTLEGLKVEHSDIDKLSISNIPFGSKRFIAHLTMAYVFTFWTCYVLLREYEIVATMRLRFLASEKRRPDQFTVLVRNIPPDPDESIGELAEHFFLVNHPDHYLTHQVVYNANKLAKLVKEKKKMQNWLDYYQLKYERNTSKRPTVKTGFLGCFGSKMDAVEHCASEIERIEKEEAEEREKIMKDPKLVVPAAFVSFRTRWGAAVCAQTQQTSNPTVWLTEWAPEPRDVYWDNLSIPIVHLTVRRLIIAVAFFFLNFFYVIPIAFVQSLANIE…
>TaOSCA33
MKISALLTSAGINIGLCVLFLSLYSVLRKQPANVRVYFGRRISEEHSRLREAFILERFVPSTGWIVKALRYTEEELLAAAGLDAVAFNRMLVFSIRIFSLAALLCVFGILPLHYYGKNILHSRIPSEDLDIFTIGNVEVRSRWLWVHCLVLYIISGVACILLYLEYRHIARLRLLHLKRATPNPGQFTVLVRGIPKITKESCSSAVDDFFTKYHGSSYLFHQVVYKVGKVQKIMTGAKKACRKLKHFTDTTVDQSYKAITYRCCLCGASSNSFHLLPTDEVVPSRGKADLDDSSLNMDNEECAAAFVFFKTRYGALVASDVLQTSNPTKWVTDPAPEPNDVYWSNIWLPYKQLWIRRIATLLGSIVFMLLFLAPVTFINGLSQLDQLQKRLPFLNGILK…
>TaOSCA2
MATIYDIAVGAALNVVTAVAFLLLFAFLRLQPINDRVYFPKWYLKGTRASPASAGATVAAAKYINLDMRSYLNFLSWMPAALKMPDDELIQHAGLDSVVYLRIYRTGLKIFVPITILAFAVLVPLNWTNDTLETLKVVHSDIDKLSISNIPYGSKRFIAHLVMAYVFTFWTCYILMKEYQIVAKMRLRFLASEKRRPDQFTVLVRNIPSDPDESVSELVEHFFLVNHPGHYLKHQVVYNTNKLAGLVEKKKQMQNWLDYYQLKFERKAERPTTKTGFFGCFGSDVDAIDYYRSEIEKIGKEEADEHKKVMKDPKSIMPAAFVSFRSRWGAAVAAQTQQTSNPTVWLTEWAPEPRDVYWNNLSIPFVSLTVRRLIIGVAFFFLNFFYVIPIAFVQTLANV…
>TaOSCA20
MDAEGLLASAAINLGLALVALSLFSMLKKQPGNAPVYLPRRMAGAAGSGWVLPLGTGRLTPSFRWIRAAFRLSDDDVLRRHGLDALAVIRLFKLGIHCFSVCSIVGVLILAPVNYTSAGPSGTKRPNSMEIFTVSNVPKGSDRLWVHFSCLCFISFYVVYLLHKEYKEMSHKRIERLKHHRKRPDQFTILVQGIPVCADHGIYGCNVDHFFSKHYQTYQSYQILHDNGNIESLQKLASSLEKQIERKRDTRRCNFWQWIWFKFTSGPIDARSQEQKLKEVHHSIRIMQCKNMLKQKELPVAFVSFKSRLEAAQAAETQQHVNPLSLVTRYAPEPTETIWSNLAIPFHRLAVYKLGVFIAAFLLTVFFTIPVTAVQGIVQFEKIEKWFPPARAVQLIPGL…
>TaOSCA32
MGPGAPSPEDAAGGEPEAWYGSIQYLVNISAVGAASCVLLFLLVKLRFDHRRIPGPSALAAKLLAVYHATAPQIALHCGADAAQFLLFERASFLVLAAVSAAAFAAALPLNLLAGDAAIADQFAATTISHIPRASPLLWLHLLLTAAVVAIAHLGISRMEDALRITRFRDGNGNPSDPNSSSVAVFTIMIQGIPRALAADKAPLKEYFEHKYPGKVYRVIVPFDLCTLEYLADEWGKVRNKISWLEAKMDARSLFDEFVQDESGQLEAHWLVRRCKELWAMAAQRFGFTDDERLRKLQTRKLVIGSRLSDYKEGRAPGAGIAFIVFKDVYTANKAVRDFRMERKKTPIGRFFPVMELQLERSRWRVERAPPASDIYWNHLGMNKTSLALRRIAVNTCLI…
>TaOSCA29
MGPGAPSPEDAAGGEPEAWYGSIQYLVNISAVGAASCVLLFLLVKLRFDHRRIPGPSALAAKLLAVYHATAPQIALHCGADAAQFLLFERASFLVLAAVSAAAFAAALPLNLLAGDAAIADQFAATTISHIPRASPLLWLHLLLTAAVVAIAHLGISRMEDALRITRFRDGNGNPSDPNSSSVAVFTIMIQGIPRALAADRAPLKEYFEHKYPGKVYRVIVPFDLCTLEYLADEWGKVRNKISWLEAKMDARSLFDEFVQDESGQLEAHWLVRRCKELWAMAAQRFGFTDDERLRKLQTRKLVIGSRLSDYKEGRAPGAGIAFVVFKDVYTANKAVRDFRMERKKTPIGRFFPVMELQLERSRWRVERAPPASDIYWNHLGMNKTSLALRRIAVNTCLI…
>TaOSCA42
MIVSALATAVGVNLGLTVLLVSAYSLLRRRPPFVSVYAPRRPYAPLESWLAAAWRRSEDDIHAAAGLDGVVFVRIFVFSIRLFAVVAVVGVGVLMPINFMGDQLRLIDFTDLPSKSVDVLSISNVLDGSNKLWLHFSAVYIITGVACYLLYYEYRYISGKRLEYFMTSKPLPQYFTVLVRAIPITDGGSVSDAVDKFFKEYHSSTYLSHTVVHQTGKLRRLLNETEIMWTKLKNLKYVPQRPSTDNPPKKFLGLFGRNNPIGKYQKRLEDLEENVRMEQSDATRRREIPAAFVSFKSRYASANAIYIRQSDNPTEWQTEHAPDPHDVYWPSFSTSFMERWISKFVVFVASVLLIIVFLLVVGFIQGLTYMEQLEAWLPFLRNILEIAIVSQLVTGYLPS…
>TaOSCA8
MATIKDIGVGAAFNIVTATIFLLIFAFLRLQPINDRIYFPKWYLKGMRDSPSSAGAAVTKYVNLNVRSYLKFLSWMPAALKMPEEELIEHAGLDSVVYLRIYLTGLKIFLPITILAFAVLVPVNWTNDTLDDLKVVHSDIDNLSISNIPYGSKRFIAHLVMAYVFTFWTCYVLKNEYERVATMRLRFLASEKRRPDQFTVLVRNIPPDPDESVSELVEHFFLVNHPDHYLKHQTVYNANKLADLVEKKKKMRNWLDYYQNKLERKSKRPTTKTGFLGCFGSEVDAIDHCKSEIEKIGTEEAEERKKVMKDPKSIMPASFVSFRSRWGAAVCAQTQQTSNPTLWLTEWAPEPRDVYWSNLSIPFVSLTVRRLIIGVAFFFLNFFYVIPIAFVQTLANLEG…
>TaOSCA30
MKVGALLTSAGINIGLCILFLSFYSVLRKQPQNVKVYFGRRIAEQHKRLRGAFILERFVPSPSWIVRSLQCTEDEILSTAGLDAVVFNRVLVFSIRIFSLAAILCLFGVLPLNYFGQDMQHEQIPSASLETFTIGNMKEKSIWLWVHCVVLYIISGVACFLLYMEYKHIARLRLLHLVRTTTNRSQFTVLVRGIPKSTHESFNSAVESFFTSYHAPSYLSHQVVYKVGKLQKIVTGAKKVYRKFKHFKGTTVDQTCRSVTYRCCLCGVSSNSFQLLPTEEQEREKPCVKNSNLNLPAEECAAAFVFFKTRYAALIVSKILQTSNPMKWVTSLAPEPKDMYWSNLWLPYKQLWIRRIATLLGSIVFMFIFLVPVTFIQGLTQLEQLQQRLPFLKGLLKGK…
>TaOSCA14
MDISSFVTSLLTSFVIFAVLVLVFTWLSRRPGNAPVYYPSVLLRGLDPWEGRGRGTRSPVGWIRQAFAASEADVVAASGVDAAVYLVFLSSVLAILAFSGIVLLPVLLPVAGTDHALEDSTGRVPRNVTDFERLALGNVQDGSARLWAFIFAVYWVSFVTYFILWRSYKHVSNLRAAARSTSDVKPEEFAMLVRDVPVPPPNQTIKDSVDSYFRALHPDTFYKAMVVTDITKADKIFQEIEGHKHKIAHAEAVYAESKIANRPEGTRPTHRTGFLGLIGKKVDTLEYCNEKIKELLPKLEDEQKSTLSEKQQRAAFVFFNSRAAAASASQTLHAQMFDEWTVTEAPEPRAVIWTNLPRKIYDRQTRQTVVYLIVFVTVVFYMIPITAISAVTTLEQLRK…
>TaOSCA16
MDISSFVTSLLTSFLIFAVLVLVFTWLSRRPGNAPVYYPSVLLRGLDPWEGRGRGTRSPVGWIRQAFAASEADVVAASGVDAAVYLVFLSSVLAILAFSAIVLLPVLLPVAGTDHALEDSTGRVPRNVTDFERLALGNVQDRSARLWAFIFAVYWVSFVTYFILWRSYKHVSNLRAAARSTSDVKPEEFAMLVRDVPVPPPNQTIKDSVDSYFRALHPDTFYKAMVVTDITKADQIFQEIEGHRHKIAHAEAVYAESKTSNRPEGTRPTHRTGFLGLIGKKVDTLEYCNEKIKELLPKLEDEQKSTLSEKQQRAAFVFFNSRAAAASASQTLHAQMFDEWTVTEAPEPRAVIWTNLPRKIYDRQTRQTVVYLIVFVTVVFYMIPITAISAVTTLDKLRE…
>TaOSCA31
MEFSALLTSAGINIALCILYLSLYSILRKQPHNFRVYFGRRLAEEKFREQVDYFSFERLLPTAGWLVKAYWCTEDEIRRVAGLDSVVFLRLFIFSIRIFSITTLICVFGVLPVNYNGQEMAHTRVPAESLNVFTIANLKEGSSKLWVHCTALYVITISACILLFQEYRYISRKRLAHITGSTPNPGHFAVLVRSIPKSHNELLDDTIRNFFLNYHGSSYLSHQMIYRKGKLQNFVDSAERAYRKFVRVKLSAFDQNMRSSLNRCGLCGVQASSFELYRNKFVEAKKSDLTDPEVVEAQKDCPGAIVFFKTRYAAIVASQVLQSSNPMLWVTNLAPEPRDVYWSNLWIPYRQIWLRKIATLAASVFFMFVFIVPVAFVQSMMQLEQLKQMFPNLRGALKT…
>TaOSCA23
MDAEGLLASAAINLGLALVALSLFSMLKKQPGNAPVYLPRRMAGAAGSGWVLPLGTGRLTPSFRWIRAAFRLSDDDVLRRHGLDALAVIRLFKLGIHCFSVCSIVGVLILAPVNYTSAGPSGTKRPNSMEIFTVSNVPKGSDRLWVHFSCLCFISFYVVYLLHKEYKEMSHKRIERLKYHRKRPDQFTILVQGIPVCADHGIYGCNVDHFFSKHYQTYQSYQILHDNGNIESLQKLASSLEKQIERKRDTRRCNFWQWIWFKFTSGPIDARSQEQKLKEVHHSIRILQCKNMLKQKELPVAFVSFKSRLEAAQAAETQQHVNPLSLVTRYAPEPTETIWSNLAIPFYRLAAYKLGVFIAAFLLTVFFTIPVTAVQGIVQFEKIEKWFPPARAVQLMVNA…
>TaOSCA27
MKVGALLTSAGINIGLCILFLSFYSILRKQPQNVKVYFGRRIVEQHKRLRGAFILERFVPSPSWIVRSLQCTEDEILSTAGLDAVVFNRVLVFSIHIFSLAAILCLFGVLPLNYFGQDMRHERIPSTSLETFTIGNMKEKSIWLWVHCIALYTISGVACFLLYMEYKRIARLRLLHLVRTMSKHSHFTVLVRGIPKSTHESFNSVVESFFTTYHAPSYLSHQVVYKVGKLQKIVTGAKKVYRKFKHFKGTTVDQTCRSVTYRCCLCGVSSNSFQLLPTEEQERGKPCVKNSNLNLPAEECAAAFVFFKTRYAALIVSKILQTSNPMKWVTSLAPEPKDMYWSNLWLPYKQLWIRRIATLLGSIVFMFIFLVPVTFIQGLTQLEQLQQRLPFLKGLLKGK…
>TaOSCA22
MATIEDIGVSAAINILSAVIFLLAFAFLRLQPINDRVYFPKWYLKGSRQSPSHGGAFVRKFVNLDMRSYLKFLSWMPAALQMPEDELISHAGLDSAVYLRIYLTGLKIFVPITILAFLVLVPVNWTNDTLEGLKVEHSDIDKLSISNIPFGSKRFIAHLTMAYVFTFWTCYVLLREYEIVATMRLRFLASEKRRPDQFTVLVRNIPPDPDESIGELAEHFFLVNHPDHYLTHQVVYNANKLAKLVKEKKKMQNWLDYYQLKYERNTSKRPTVKTGFLGCFGSKVDAVEHCASEIERIEKEEAEEREKIVKDPKLVVPAAFVSFRTRWGAAVCAQTQQTSNPTVWLTEWAPEPRDVYWDNLSIPIVHLTVRRLIIAVAFFFLNFFYVIPIAFVQSLANIE…
>TaOSCA40
MKISALLTSAGINIGLCVLFLSLYSVLRKQPANVRVYFGRRISEEHSRLREAFILERFVPSTGWIVKALRYTEEEVLAAAGLDAVAFNRMLVFSIRIFSLAALLCVFGILPLHYYGQNIQHLRIPYEDLDIFTIGNVEKRSRWLWVHCLVLYILSGVACILLYLEFRHIARLRLLHLKRATPNPGQFTVLVRGIPKTKKESCSSAVDDFFTKYHASSYLFHQIVYKTGKVQKIMTGAKKACRKLKNFTDTTVDQSCKAITYRCCLCGASSNSFQLLPTDEVVPSRGKVDLDDSSLNIDNEECAAAFVFFKTRYGALVASDVLQTSNPTKWVTDLAPEPNDVYWSNIWLPYKQLWIRRIATLLGSIVFMLLFLAPVTFINGLSQLDQLQKRLPFLNGILK…
>TaOSCA3
MATLQDLGVSAFINILGAFVFLLLFAVLRIQPINDRVYFPKLYIAGKRAADHRGARRAINLNLCTYFKFLSWVPGALRMTQTELIHHAGLDSAVYLRIYTLGLKIFLPVMVVALLVLIPVNVSGGTLLNLRKDVMFSDIDKLSISNVSPGSNRFFIHLLMAYVFTFWTCFMLYKEYSNVAFMRLHFLASQKRSADQFTVIVRNIPRVSSHSTSETVDEFFRRNHPDHYLGQQAVYNANRYAKLVKQKERLQNWLDYYQLKFERHPEKRPTGRTGCFGFYGRQVDQIDYHRARISELDKRIASERQRVLNDPKAIMPVSFVTFDSRWGAVVCAQTQQSKNPTQWLTNWAPEPRDVYWQNLAIPFFSLSIRKFLISIAVFALVFFYMIPIAFVQSLANLEG…
>TaOSCA4
MGSLNEIAVAAGINISSALGFLLAFAILRIQPINDRVYFPKWYLKGTRSSPRHIGAGFSKFVNADFSTYLRFLNWMPAALQMPEPELIEHAGLDAAVYVRIYLLGLKIFVPIALLAFIVLVPVNWSSGTLEHEKDLNYDEIDKLSISNLGKGSKRFWIHIGMAYVFTFWTFYVLFHEYKVITTMRLRFLANQSRRPDQFTVLVRNVPPDPDETVSEHVEHFFAVNHRDHYLSHQIVYNANALAGLVEKKKGLKNWLVYYENQHAHNPAKKPTMKTGLWGLWGRKVDAIEYYKAEIEELCKQEDVERQKVMSDPNAIMPAAFVSFKSQWGAAVCAQTQQTSNPTVWLTEWAPEPRDVYWPNLAIPFVELSVRRLIISVALFFLTFFFMIPIAFVQSLANL…
>TaOSCA9
MATIHDIAVGAAFNIVTAVAFLLLFAFLRLQPVNDRVYFPKWYLKGTRASPASAGATVAAAKYINLDIRSYLKFLSWMPAALKMPDDELIQHAGLDSVIYLRIYRTGLKIFVPIMILAFALLVPLNWTNDTLESLKVVHSDIDKLSISNIPYGSKRFIAHLVMAYVFTFWTCYVLMKEYQIVAKMRLRFLASEKRRPDQFTVLVRNIPSDPDESVSELVEHFFLVNHPGHYLKHQVVYNTNKLAGLVEKKKQMQNWLDYCQLKFERKAERPTTKTGFFGCFGSDVDAIDYYKSEIEKIGKEEAEEHKKVMKDPKSIMPAAFVSFRSRWGAAVAAQTQQTSNPTVWLTEWAPEPRDVYWNNLSIPFVSLTVRRLIIGVAFFFLNFFYVIPIAFVQTLANL…
>TaOSCA10
MATLQDLGVSAFINILGAFVFLLLFAVLRIQPINDRVYFPKLYIAGKRAADHRGARRAINLNLCTYFKFLSWVPGALRMTQTELIHHAGLDSAVYLRIYTLGLKIFLPVMVVALLVLIPVNVSGGTLLNLRKDVMFSDIDKLSISNVSPGSNRFFIHLLMAYVFTFWTCFMLYQEYSNVAFMRLHFLASQKRCADQFTVIVRNIPRVSSHSTSETVDEFFRRNHPDHYLGQQSVYNANRYAKLVKQKERLQNWLDYYQLKFERHPEKRPTGRTGCFGFCGRKVDQIDYYRARISELDKRIASERHRVLNDPKAVMPVSFVTFDSRWGAAVCAQTQQSKNPTQWLTNWAPEPRDVYWQNLAIPFFSLSIRKFLISIAVFALVFFYMIPIAFVQSLANLEG…
>TaOSCA18
MDIPSFVTSILTSLAVFVVLVLVFTWLSRRPGNATVYYPSLLLRGLDPWEGRGRGTRSPVGWIRQAFTASEPDVVAAGGVDAAVYLVFLSSMFAILAFAGIVLLPVLLPIAGTDNALEDSTGRMPSNVTHFEILSLANIEDRSMRLWAFISAVYWVSFVTYFILWRSYKHVSNLRAAARSTSEVKPQEFAMLVRDVPIPPPNQTIKDSVDSYFRALHPDTFYKAMVVTDITKVDKIFQEIEGHKHKIAHAEAVYAESKTANRPEGTRPTHKTGFRGLIGKKVDTIEYCNEQIKELLPKLEDERKSALSEKQQRAAFVFFNSRAAAASASQTLHAQMFDEWTVTEAPEPREVIWANLPRKIYDRHTRQTVVYLIVFVTVAFYMIPITAISAVTTLEKLRE…
>TaOSCA15
MGSLNDIGVAAGINILSAVGFLLVFAVVRIQPINDRVYFPKWYLKGTRSSPRHIGNVLSKFVNADVSTYLRFLNWMPAALKMPEPELIEHAGLDSAVYVRIYLLGLKIFVPITVLAFAVLVPVNWTSATLGDDEEGLSYDQIDKLSISNLGQGSKRFWVHIGMAYVFTFWTFYVLYHEYKVITTMRLHFLANQNRRPDQFTVLVRNIPADPDETVGEHVEHFFAVNHREHYLSHQVVYNANTLASLVEKKKGLQNWLVYYENQHAKNPEKELIIKTGLWGLWGEKVDALQHYKTTIEELCKQEDEERQKVISDPKAIMPAAFVSFNSQWGAAVCAQTQQTSNPTVWLTEWAPEPRDVYWPNLAIPFVELSIRRLIMAVALFFLTFFFMVPIALVQSVAN…
>TaOSCA41
MKISALMTSAGINIGICVLLWSLYSVLRKQPAFVRVYFGRRIAEENRLLREAFILERFVPSTGWIVKALQCTEEELLAAAGLDAVAFNRMLVFSIRIFSLAAILCLFGILPVHYFGRKMHRLEISSEQLHMFTVGNVEVQSRWLWVHSIVLYIISGVACFLLYVEYRHIARLRLIHLKRATVNPGQFTVLVRGIPKTTNESCSTDVDDFFTKYHPSSYLFHQVVYKAGKVQKIITGAKKACGMSDPSTDTTLDQSCEAITYPCSLCGASSDSFRLLPTAEVAKNIDNEFWNCLQECAAAFVFFKTRYGALVASEALQTSNPTNWVTDLAPEPDDVYWSNIWLPYKQLWIRRIATVLGSLVFLVSFLLPVAFIQGLSRLDQLQKKLPFLDGLLKKPYMSQ…
>TaOSCA37
MKISALMTSAGINIGICVLLWSLYSVLRKQPAFVRVYFGRRIAEENRLLREAFILERFVPSTGWIVKALQCTEEDLLAAAGLDAIAFNRILVFSIRIFSLAAILCLFGILPVHYFGRKTHHLEIPSEQLHMFTVQNVEVQSRWLWVHSLVLYIISGVACFLLHIEYKHIARLRLLHLKRTTLNPGQFTVLVRGIPKTANESCSSDVDDFFTKYHASSYLFHQVVYKAGKVQKIMTGAKKACGKLDHSTSTDTTLDQSRKAITYPCCVCGASSNSFQLLPTDEVAKNIDNEECAAAFVFFKTRYGALLASQALQTSNPTKWVTDLAPEPDDVYWSNIWLPYKQLWIRRIATLLGSLVFSVLFLLPVTFIQGLSQLDQVHRKLPFLNGLLKQPYISQIITG…
>TaOSCA5
MATIYDIGLGAAFNIVTATIFLLIFAFLRLQPVNDRVFFPKWYLKGMRDSPSSAGAAVNKYVNLDVRSYLKFLSWMPAALKMPEEELIEHAGLDSVVYLRIYLTGLKIFVPITILAFGVLVPVNWTNDALDDLKVVHSDIDNLSISNIPYGSKRFIAHLVMAYVFTFWTCYVLKNEYERVATMRLRFLASEKRRPDQFTVLVRNIPPDPDESVSELVEHFFLVNHPDHYLKHQTVYNANKLADLVEKKKKMRNWLDYYQNKFERKSKRPTTKTGFLGCFGSEVDAIDHCKSEIEKIGKEEAEERIKVMKDPKSIMPAAFVSFRSRWGAAVCAQTQQTSNPTLWLTEWAPEPRDVYWSNLSIPFVSLTVRRLIIGVAFFFLNFFYVIPIAFVQTLANLEG…
>AtOSCA1.1
MATLKDIGVSAGINILTAFIFFIIFAFLRLQPFNDRVYFSKWYLRGLRSSPASGGGFAGRFVNLELRSYLKFLHWMPEALKMPERELIDHAGLDSVVYLRIYWLGLKIFAPIAMLAWAVLVPVNWTNNELELAKHFKNVTSSDIDKLTISNIPEGSNRFWAHIIMAYAFTIWTCYMLMKEYETVANMRLQFLASEGRRPDQFTVLVRNVPPDPDETVSELVEHFFLVNHPDNYLTHQVVCNANKLADLVSKKTKLQNWLDYYQLKYTRNNSQIRPITKLGCLGLCGQKVDAIEHYIAEVDKTSKEIAEERENVVNDQKSVMPASFVSFKTRWAAAVCAQTTQTRNPTEWLTEWAAEPRDIYWPNLAIPYVSLTVRRLVMNVAFFFLTFFFIIPIAFVQS…
>AtOSCA1.2
MATLQDIGVSAGINILSAFVFFIIFAVLRLQPFNDRVYFSKWYLKGLRSSPARGGAFAQRFVNLDFRSYMKFLNWMPEALKMPEPELIDHAGLDSVVYLRIYWLGLKIFTPIAVLAWAVLVPVNWTNNTLEMAKQLRNVTSSDIDKLSVSNIPEYSMRFWTHIVMAYAFTIWTCYVLMKEYETIANMRLQFVASEARRPDQFTVLVRNVPPDADESVSELVEHFFLVNHPDHYLTHQVVCNANKLADLVKKKKKLQNWLDYYQLKYARNNSQRIMVKLGFLGLWGQKVDAIEHYIAEIDKISKEISKEREEVVNDPKAIMPAAFVSFKTRWAAAVCAQTQQTRNPTQWLTEWAPEPRDVFWSNLAIPYVSLTVRRLIMHVAFFFLTFFFIVPIAFVQSL…
>AtOSCA1.3
MATLGDIGVAAAINILTAIIFLLAFAILRIQPFNDRVYFPKWYLKGIRSSPLHSGALVSKFVNVNLGSYLRFLNWMPAALKMPEPELIDHAGLDSAVYLRIYLIGLKIFVPIALLAWSILVPVNWTSHGLQLAKLRNVTSSDIDKLSISNIENGSDRFWTHLVMAYAFTFWTCYVLMKEYEKVAAMRLAFLQNEQRRPDQFTVLVRNVPADPDESISDSVEHFFLVNHPDHYLTHQVVYNANDLAALVEQKKSTQNWLDYYQLKYTRNQEHKPRIKTGFLGLWGKKVDAIDHYIAEIEKLNEQIMEERKKVKKDDTSVMPAAFVSFKTRWGAAVSAQTQQSSDPTEWLTEWAPEAREVFWSNLAIPYVSLTVRRLIMHIAFFFLTFFFMIPIAFVQSLA…
>AtOSCA1.4
MATLADIGLAAAINILSALIFLLLFAILRIQPFNDRVYFPKWYLKGVRSSPVNSGAFVSKIMNLDFRSYVRFLNWMPDALKMPEPELIDHAGLDSAVYLRIYLIGLKIFGPIALLSWSILVPVNWTSDGLQLAKLRNVTSSNIDKLSISNVERGSDRFWAHLVMAYAFTFWTCYVLMKEYEKIAAMRLSFLQSEKRRADQFTVLVRNVPPDSDESISENVQHFFLVNHPDHYLTHQVVYNANELAKLVEDKKKMQNWLDYYQLKYTRNKEQRPRMGFLGLWGKKVDAMDHYTAEIEKLSEQIMEERKRIKKDDKSVMQAAFVSFKTRWGAAVCAQTQQTKNPTEWLTEWAPEAREMYWPNLAMPYVSLTVRRFVMHIAFFFLTFFFIIPIAFVQSLASI…
>AtOSCA1.5
MATLTDIGVAATINILTAFAFFIAFAILRLQPVNDRVYFPKWYLKGLRSSPIKTGGFASKFVNLDFRSYIRFLNWMPQALRMPEPELIDHAGLDSVVYLRIYLLGLKIFFPIACIAFTVMVPVNWTNSTLDQLKNLTFSDIDKLSISNIPTGSSRFWVHLCMAYVITFWTCFVLQREYKHIASMRLQFLASEHRRPDQFTVLVRNIPPDPDESVSELVEHFFKVNHPDYYLTYQAVYNANKLSELVQKRMKLQNWLDYYQNKHSRNPSKRPLIKIGFLGCWGEEVDAIDHYIEKIEGLTRKISEEKETVMSSTKSLVPAAFVSFKKRWGAVVCSQTQQSRNPTEWLTEWAPEPRDIYWDNLALPYVQLTIRRLVIAVAFFFLTFFFMIPIAFVQTLANI…
>AtOSCA1.6
MATINDIGVAAAINIVTAFAFLLAFAIFRIQPVNDRVYFPKWYLKGLRSSSIQTGGFGSKFINLDFRSYIRFLNWMPEALKMPEPELVDHAGLDSVVYLRIYLLGLKIFFPIACVAFTTMVPVNWTNKGLDRLRHSNISFSDIDKLSLSNIPNGSPRFWVHLCMAYAITFWTCFILKREYQNIALMRLQFLANDQRRPNQFTVLVRNIPADPHESICELVEHFFKVNHPDHYLTFQAVHDATKLSELVLTRKQMQNLLDYNINKHMRNLSNRPVIKMGFLGCCGEEADGIKYYTSVVEGLTREISEEKQRLRTGTKSIVPAAFVSFKSRWGAAVCAQTQQTRNPTEWLTEWAAEPRDIYYDNLALPYVDLKIRRLIVGVAYFFLTFFFMIPIAFVQSLA…
>AtOSCA1.7
MASVQDIGLSAAINLLSAFAFLFAFAMLRLQPVNDRVYFPKWYLKGIRGSPTRSRGIMTRFVNLDWTTYVKFLNWMPAALQMPEPELIEHAGLDSAVYIRIYLLGLKMFVPITLLAFGVLVPVNWTGETLENIDDLTFSNVDKLSISNVPPGSPRFWAHITMTYVITFWTCYILYMEYKAVANMRLRHLAAESRRPDQLTVLVRNVPPDPDESVNEHVEHFFCVNHPDHYLCHQVVYNANDLAKLVAQRKAMQNWLTYYENKFERKPSSRPTTKTGYGGFWGTTVDAIDFYTSKMDILAEQEAVEREKIMNDPKAIMPAAFVSFRSRWGTAVCAQTQQCHNPTIWLTEWAPEPRDVFWDNLAIPYVELSIRRLLTTVALFFLIFCFMIPIAFVQSLANL…
>AtOSCA1.8
MATLQDIGVSALINLFGAFLFLIAFAVLRIQPINDRVYFPKWYLTGERNSPRRSDRTLVGKFVNLNYKTYFTFLNWMPQAMKMSESEIIRHAGLDSAIFLRIYTLGLKIFAPVMVLALVVLVPVNVSSGTLFFLKKELVVSNIDKLSISNVQPKSSKFFFHIAVEYIFTFWACFMLYREYNNVAIMRLQYLASQRRRPEQFTVVVRNVPDMPGHSVPDTVDQFFKTNHPEHYLCHQAVYNANTYAKLVKQRAKLQRWFDYYVLKHQRNPHKQPTCRTGFLGLWGKRVDSIEYYKQQIKEFDHNMSLERQKVLKDSKLMLPVAFVSFDSRWGAAVCAQTQQSKNPTLWLTSSAPEPRDIYWQNLAIPFISLTIRKLVIGVSVFALVFFYMIPIAFVQSLA…
>AtOSCA2.1
MEISALLTSAGINISICIVLLSLYSILRKQPANYCVYFGRRLVCGGARRYDPFWYERFVPSPSWLVKAWETSEDELLAAAGLDAVVFLRMVIFSIRIFFIVAVICIAFVLPVNYYGQPMVHKEIHLESSEVFTIENLKEGSKWLWVHCLALYIITSAACLLLYFEYSTIAKMRLGHITGCASKPSQFTVLIRAIPWSPEQSYSDTLSKFFTNYYSSSYVSHQMVYHNGIIQRLLRDAERMCQTLKHVSPEINCKPSLRPCTFCGGPTATSSFHILSNEADSVKGMELGELTMTTTTTEQERSAAFVFFKTRYDALVVSEVLQSSNPMLWVTDLAPEPHDVYWKNLNIPYRQLWIRKIATLVGAVAFMFVFLIPVTFIQGLTQLVQLSHAFPFLRGILSK…
>AtOSCA2.2
MDVSALLTSAGINIAICVVLVSLYSILRKQPANYCVYFGRLLSDGRVKRHDPRWYERFAPSPSWLVKAWETTEEEMLAAAGLDAVVFIRMVICSIRIFSIVAVVCLAFVLPVNYYGQKMEHKEVHLESLGVFTIENLNPRSRWLWVHCLSLYIISSAACALLYFEYKNIAKKRLAHISGSASKPSHFTVLIRAIPQSPDQSYSETVSKYFTNYYAPSYVSHLMVYRDGFIHRLMNETERMCQAIKHVSPDLSCNPSLKSCVLCGPAATNSFQIISNETDSVKGLELGELTLTTTEEERPVAFVFFKSRYDALVVSEVLQTPNPMLWVADLAPEPHDVHWRNLRIPYRQLWMRRIATLVGAIAFMFVFLFPVTFVQGLTQLPTLSKNFPFLKDLLNRRFM…
>AtOSCA2.3
MLLSALLTSVGINLGLCFLFFTLYSILRKQPSNVTVYGPRLVKKDGKSQQSNEFNLERLLPTAGWVKRALEPTNDEILSNLGLDALVFIRVFVFSIRVFSFASVVGIFILLPVNYMGTEFEEFFDLPKKSMDNFSISNVNDGSNKLWIHFCAIYIFTAVVCSLLYYEHKYILTKRIAHLYSSKPQPQEFTVLVSGVPLVSGNSISETVENFFREYHSSSYLSHIVVHRTDKLKVLMNDAEKLYKKLTRVKSGSISRQKSRWGGFLGMFGNNVDVVDHYQKKLDKLEDDMRLKQSLLAGEEVPAAFVSFRTRHGAAIATNIQQGIDPTQWLTEAAPEPEDVHWPFFTASFVRRWISNVVVLVAFVALLILYIVPVVLVQGLANLHQLETWFPFLKGILNM…
>AtOSCA2.4
MLLSALLMSVGINSCLCVLLFILYSVLRKQPRNYEVFLPRRLANGTYKRRRNKVARYIPSLKWIWKSWRPTEKELMESSGLDGVVFMRMITFSLKVFLFAGIIGVFVLLPVNCFGDQLTVIDYADWSANSLDLFSVANLKVRSQWLWVHFGAIYLVTVFVCCLLYFEFRYIALKRIEHFYSSKPKPEQFTILVRNIPSSDGSSVSDTVDRFFGENHSSTYFSHVVIHRTSKLRSVVDKAKKLYKEVKHKKPVKKTPMRFFSRKDNTEGHYESVLQEMEQNIRLGQAEVSAPGKEVRAAFVSFKSRYGAATALHMPQSINPTYWLTEPAPEPHDVHWPFFSASFMQKWLAKILVVFACLLLTILFLVPVVLVQGLTNLPALEFMFPFLSLILSMKVVSQI…
>AtOSCA2.5
MTPESLLASASINIGLAVVALWLFSVLKKQPRNAVVYYARRLSDRHHHRPLSLHSSLCLPRFLPSVAWIPRAFRVPEDEILSRHGLDALVLIRLFKFGIRFFLMCSLLGASLLLPVDYYNESDLPTRREYSMDAFTISNITRGSNKLWVHFSCLWCISFYALFLLHKEYKEILVIRLQQMKELRHRADQFTVLVRQVPLCPEHNTRGCAVDHFFSKHHRFSYHSHQMLYDGRDLEYLLGKQKKLKKELEDKRHTEILSNGSQEHKQISTSEEKLREITHMIYHLQSETMLREKELPVAFVTFKSRRNAALAAQTQQHSNPLELITEMAPEPRDVSWRNLAIPQKILPLNKIGVILAAALLTIFFAIPVTAVQGIAKYEKLKKWFPPAMAIEFIPGLSSV…
>AtOSCA3.1
MEFGSFLVSLGTSFVIFVILMLLFTWLSRKSGNAPIYYPNRILKGLEPWEGTSLTRNPFAWMREALTSSEQDVVNLSGVDTAVHFVFLSTVLGIFACSSLLLLPTLLPLAATDNNIKNTKNATDTTSKGTFSQLDNLSMANITKKSSRLWAFLGAVYWISLVTYFFLWKAYKHVSSLRAQALMSADVKPEQFAILVRDMPAPPDGQTQKEFIDSYFREIYPETFYRSLVATENSKVNKIWEKLEGYKKKLARAEAILAATNNRPTNKTGFCGLVGKQVDSIEYYTELINESVAKLETEQKAVLAEKQQTAAVVFFTTRVAAASAAQSLHCQMVDKWTVTEAPEPRQLLWQNLNIKLFSRIIRQYFIYFFVAVTILFYMIPIAFVSAITTLKNLQRIIPF…
>AtOSCA4.1
MNRNFSPAAMPPISSMTIDNSFSPPPSSGDLPEIPDAWYGNIQYLLNISVIGLLCCVSIFLFVKLRSDHRRMPGPSALFSKLLAVWKATCREIARHCGADAAQFLLIEGGSFVLLFSIAVLAVSVMLPLNLYAGTALLSDELSKTMITHIQKGSALLWLHFVFVVIVVVISHFGIAAIEARLKFTRFRDGNGNISDPNANSTAVFTIMVQGLPKNLGSDRVEFEDCFRLKYPGKVYKFIVPMDLCALDDLATELVRVRDEITWLVAKMDSRLLPDEYENVGDNGLVFCVCSLWVRVKVLWSQITERFGFTDDEKLRKLQELRADLESQLAAYKEGRAQGAGVAFVMFKDVYTANKAVQDFRNERSRRTGKFFSVTELRLQRNQWKVDRAPLATDIYWNH…
>OsOSCA1.1
MATIQDIGVSAAINILSAITFLLAFAFLRLQPINDRVYFPKWYLKGARESPSHGGAFVRKFVNLDMRSYLKVLSWMPAALKMPEDELISHAGLDSAVYLRIYLIGLKIFAPITVLAFIILVPVNWTNITLQSSKVQHSDIDKLSISNIPVGSKRFAAHLTMAYVFTFWTCYVLLREYEIVATMRLRFLASEKRRPDQFTVLVRNIPPDPDESIGELVEHFFLVNHPDHYLTHQVVYNANKLDKMVKEKKKMQNWLDYYQLKYERNTSQRPTTKTGFLGCFGSKVDAIEYYTSEIERIEKEETDERGKIMKDPKSVVPAAFVSFRSRWGAAVCAQTQQTSNPTVWLTEWAPEPRDVYWDNLSIPFVYLTIRRLIIAVAFFFLNFFYVLPIAFVQSLANIE…
>OsOSCA1.2
MATVSDIGLSAAINVSMAVAFLLVFAFLRLQPINDRVYFPKWYLRGMRDSPVSSGAAVQKVVNLNMRSYLKFLSWMPAALKMPEDELINHAGLDSAVYLRIYLTGIKIFVPISILASLVLFPVNWTNDTLDSMKVVHSKIDKLSISNIPYGSNRFVTHLVMAYAVTFWTCYVLFREYEIITTMRLRFLASEKRRPDQFTVLVRNIPPDPDESISELVEHFFLVNHPDHYLRHQVVYNANKLADLVEKKKKLQNWLDYYQLKYERNPSKRPTTKTGFLGCFGSEVDAIEYYKAEIEKIGKEEADERQKIMKDPQSAVPAAFVSFRSRWGAAVCAQTQQTSNPTVWITEWAPEPRDVYWNNLSIPFVSLTVRRLIVAVAFFFLNFFYVIPIAFVQSLASLE…
>OsOSCA1.3
MGSLTDIGVAAGINILSALGFLLAFAVLRIQPINDRVYFPKWYLKGTRSSPRSMGTVFSKFVNADLSTYIRFLNWMPAALQMPEPELIEHAGLDSAVYVRIYLLGLKIFVPIAVLAFIVLVPINWASGTLEKEKSLSYDQIDKLSISNLGKGSKRFWAHIVMAYVFTFWTFFVLYREYKVVTTMRLRFLAIQNRRADQFTVLVRNVPPDPDETVSEHVEHFFAVNHRDHYLSHQTVYNANTLAGLVEQKKGLQNWLVYYENQHAKNPAKKPTMKTGLWGLWGKRVDAIEHYTTAIEELCKQEDEERHKVITDPNAIMPAAFVSFKSRWGAAVCAQTQQTSNPTLWLTEWAPEPRDVFWPNLAIPFVELSVRRLIMAVALFFLTFFFMIPIAIVQSMANL…
>OsOSCA1.4
MATLPDLGVSAFINILGAFVFLLIFAALRLQPINDRVYFPKLYLTGQRRHHPHPHGFVNLDLCSYLRFLAWVPGALRMSQPDLIHHAGLDSAVYLRIYTLGLKIFLPIMTVALLVLIPVNVSGGTLLNLRKEIVFSDIDKLSISNVNPGSNRFFIHLLMAYVFTFWTCFMLYKEYSNVAFMRLHFLASQKRCADQFTVIVRNIPHVSSHSTSETVDEFFRRNHPDHYLGQQAVYNANRYAKLVKKKERLQNWLDYYQLKFERHPGKRPIGRTGCLGFCGREVDQIDYYRARISELDKKLASERQRVLNDPKAVMPVAFVTFDSRWGAAVCAQTQQSKNPTQWLTDWAPEPRDVYWQNLAIPFFSLSIRKFLISIAVFALVFFYMIPIAFVQSLANLEGI…
>OsOSCA2.1
MKISGLLTSAGINIALSVLFISLYSVLRKQPANVRVYFGRRIAEEHNRLREAFILERFVPSTGWIVKALQCTEEEILAAAGLDAVVFNRILVFSLRIFSLAAILCVFGILPLNYFGQDIHHVRIPSESLDIFTIGNVKVRSRWLWVHCVALYIISGVACILLYLEYKHIARLRLRHLTCAMPNPSHFTVLVRGIPKETKESCSNAIDDFFTKYHGSSYLFHQVVYKVGKVQKIMTGAKKAYRKFKHFTDSTIDQRCRAISYRCCLCGASSNSFQLLATGLEQNQGKSDLQDSSLKLDDQECAAAFVYFRTRYAALVASEILQTSNPMKWVTDLAPEPDDVYWSNLWLPYKQLWIRRIATLLGSIVFMLFFLIPVTFIQGLSQLEQLQQRLPFLKGILEK…
>OsOSCA2.2
MKKHDVKDSELSLPDKDCGAAFVFFKTRYAALVVSEIVQTSNPMEWVTSLAPDRDDVYWSNLWLPYKQLWIRRIVTLSGSIVFMFLFLIPVTFIQGLTQLEQLQQRLPFLNGILKKKYITQLVTGYLPSVILQIFLYTVPPTMMFFSTLEGPVSHSERKRSACCKVLYFTIWNVFFVNVLSGSAISQVNALSSPKDIPMVLARAVPVQATFFTTYVLTSGWASLSSELMQLFGLTWNFIMKYVLRMKEDSYFVPSFPYHTEVPKVLLFGLLGFTCSVLAPLILPFLLVYFFLGYVVYRNQFLNVYCTKYDTGGLYWPIAHYTTIFSIVLTQIICLGVFGLKESPVAAGFTVPLIILTLLFNQYCSNRLRPLFKTLPAQDLIDMDREDEQSGRMDDIHHR…
>OsOSCA2.3
MEFSALLTSAGINIGLCALFLSLYSVLRKQPHNYGVYFGRRLAEEKFRQQVDYFSLERLLPTAGWIVKAYWCTEEEIRRVAGLDSVVFLRLFIFSIRIFSITSLVCIFGVLPVNYHGKETNHGRIPAESLNVFTIANLKEGSRMLWVHCVALYVITISACILLYYEYKYISRKRLAHITGSPPGPGHFSVIVRSIPKSDNELLDDTIRNFFVNYHGSSYLSHQMIYRKGSMQKFVDNAERVYRKFVRVKMSSFGQSRRSDLSRCGLCGVRASSFQQYRNKFINSKKPDLSDPEVIEAQKDCPGAIVFFKTRYAAIVASRILQSSNPMLWVTDFAPEPRDVYWSNLWIPYRQIWLRKIATLAASVAFMFVFIVPVAFVQSMMQLDQIEQLFPSLKNMLKK…
>OsOSCA2.4
MILSALATSVGINLGLTVLLAAAYTLLRRRPPYVAVYSPRRPYAPPEPWLPAAWRRTEADVHAAAGLDGVVFLRIFVFSIRVFAAAAVVGVGVLMPVNFMGDQLRQIDFSDLPNKSVDLFSVSNVQDGSNKLWLHFSAVYIITGITCYLLYYEYKYISGKRLEYFMTSKPLPQHFTVLVRAIPVTNGVSVSDAVDKFFKEYHSSTYLSHTVVHQTGKLRRLLNDAENICTKLANLKSVRRTSGDPPGKFLGIFGRNDLVGKYQKRLEDLEENVRMEQSDTTRSRQEVPAAFVSFRSRYGAANAIYIRQSDKPTEWQTEHAPDPHDVYWPFFSTSFMDRWISKFVVSVASILLILVFLLVSAFVQGLTYMEQLETWLPFLRNILEIAVVSQLVTGYLPSV…
>OsOSCA2.5
MDAEGLLASAAINLGLALVALSLFSLLKKQPGNAPVYLARRMAAGGGGGGLPLGHGRLTPSFRWIRAALRLSEDDVLRRHGLDALVVVRLFKFGIKCFAVCSIVGLFILAPTNYSCEGLQDTKRSNSMELFTVSNVARGSNRLWVHFACLCFISFYVVYLLHKEHKEMSSRRIAHLKYHRKRPDQYTILVRGIPLCPDHGTYGCYADHFFSKHYRTYQSYHIVHDIGNIKALQKLASSLEDKIKRKRETRRCNFWKWIWFKLTLEAIDTRKLEEKLKNVHHSIRLLQCENMLKRKELPVAFVSFKSQLDAAQAAEMQQHVNPLSLVTTYAPEPPDALWTNLAIPFCRIAIYKLGVFIAAFLLIVFFTIPVTAVQGIVQFEKIKIWFPPARAVELIPGLN…
>OsOSCA3.1
MDTASFVTSLLTSFVIFVVLVLVFTWLSSRPGNAPVYYPSVLLRGLDPWEGRGRGTRSPVGWLRQAISASEGDVVAAGGVDAAVYLVFLSSVLSILVFSGIVLLPVLLPVAATDDNLNLERAIGLKNGKTPQNFTELEKLALGNVQEHSRRLWAFLLSVYWVSFVTYFVLWKSYKHVSNMRAAARSTPDVKPEEFAVLVRDVPKPPPDQTIKDSVDSYFRALHPDTFYRSMVVTDHTKADKIYQEIEGHKQKIARAEVVYAESKTTGKPEGTKPTHRIGFLGLIGKKVDTIEYCNDQIKELLPKLEAEQKTTLREKQQQAAIVFFNRRSAAASASQTLHAQMFDKWTVEQAPEPRQIIWSNLSKKIYERQIRQVVVYTIVFLTVVFYMIPITAISALTT…
>OsOSCA4.1
MGPTAPPPDAGGGEPEAWYGSIQYLVNISAVGAASCVLLFLLVKLRFDHRRIPGPSALAAKLLAVYHATAPQIALHCGADAAQFLLFERASFLVLAAVAAAAVAAALPLNLLAGDAAIADQFAATTISHIPKSSPLLWLHLLLTAAVVAIAHLGISRMEDALRITRFRDGNGNPSDPNSSSVAVFTIMIQGIPKTLAADKTPLKDYFEHKYPGKVYRVIVPFDLCTLEYLAEEWGKVRNRISWLEARMDARNLFDEFAQGGRHSEEHWIVRRCKELWVMTAERFGFTDEEMLRRLQTKKLVLGSRLSDYKDGRAPGAGIAFVVFKDVYTANKAVRDFRMERKKTPIGRFFPVMELQLERSRWTVERAPPASDIYWNHLGLSKTSLGLRRIAVNTCLILM…
>ZmOSCA1.1a
MFMSKVEGLTSISSLERRSASKYYIFIFFNVFLASIIAGSALEQLKSYIHQSANEIPRTIGEAIPMKATFFITYTMVDGWAGVAGEILRLKPLVIFHLKNFFLVKTEKDREEAMDPGSIGFDSSEPQIQLYFLLGLVYAAVTPFLLPFVLIFFGFAYVVYRHQIINVYNQEYESAAAFWPSVHGRIITALIVSQLLLLGLLSTKGAGQSTPVLLVLPVVTFYFHKYCNNRYKPTFVKCPLQEAMKKDTLERAREPGFDLKGYLMNAYIHPVFKGDGDDDKFSVVDQPEAEQVLVATKRQSRRNTPVPSKYNGSESPSLPEIVNDQRL
>ZmOSCA1.1b
MATIQDIGLSAAINIMGAVLFLVAFAFLRLQPINDRVYFPKWYLKGARESPSHGGTFVRKFVNLDMRSYLKFLSWVPAALKMPEDELISHAGLDSAVYLRIYLVGLKIFAPISVLAFIVLVPVNWTNDTLQFSKLEHSNVDKLSISNIPVGSKRFIAHLAMAYVFTFWTCYVLLREYEVVAKMRLRFLSSEKRRPDQFTVLVRNIPPDPDESISELVEHFFLVNHPGHYLTHQVVYNANKLAKLVKEKAKMHNWLDYYQLRFERNASKRPTTKTGFLGCFGTKVDAIEYYTSEIERIENEEAEEREKIVKDPKSIVPAAFVSFRSRWGAAVCAQTQQTSNPTVWLTEWAPEPRDVYWDNLSIPFVSLTVRRLIIAVAFFFLNFFYVFPIAFVQSLANLE…
>ZmOSCA1.2
MASLGDIGLAAGLNVLTAVAFLLAFAFLRLQPINDRVYFPKWYLRGMRDNPIVSGAAVQKFVNLDARSYLKFLNWMPAALKMPQDELINHAGLDSVVYLRIYVTGLKIFVPITVLAFLVLVPVNWTNDTLGRINVVYSPIDKLSISNVPNGSKRFIAHLGMAYAITFWTCYVLLKEYEIISNMRLRFLASEKRRPDQFTVLVRNIPPDPDESISELVEHFFLVNHPDHYLQHQVVYNANKLADLVEKKKKMRNWLDYYLLKYERNSSLRPTTKTGFLGCFGSKVDAIDYYKSEIEKIGKQEAEERKNVMKDPKSVVPAAFVSFRSRWGAAVCAQTQQTSNPTLWLTEWAPEPRDVYWNNLSIPFVSLTIRRLIVAVAFFFLNFFYVIPITFVQSLANLE…
>ZmOSCA1.3
MGSLTDIGVSAGLNILSAVGFLLAFAVLRIQPINDRVYFPKWYLKGTRSSPRQLGNVFLKFVNADFSTYIRFLNWMPAALKMPEPELIEHAGLDSAVYVRIYLLGLKIFVPIALLAFAVLVPVNWTSGTLENEKGLSYDQIDKLSISNLGKGSKRFWAHIAMSYVFTFWTFFVLYHEYKVVTTMRLRFLANQNRRPDQYTVLVRNVPPDPDESVSEHVEHFFAVNHRDHYLSHQIVYNANHLSGLVEKKKGLQNWLIYYENKHAKNPAKRPKIKTGLWGLWGQRVDAIEYYQKEIEDLCKQEDEERQKVVNDPNYIMPAAFVSFKTQWGAAVCAQTQQTSNPTVWLTEWAPEPRDVFWANLAIPFVELSVRRLIVAVAFFFLTFFFMIPIAIVQSLANL…
>ZmOSCA1.4
MATLEDLGVSAFINILGAFVFLLLFAVLRIQPVNDRVYFPKLYLAHKRHQHDHAARSAFRRFVNLNLCTYVTFLSWVPGALRMSEPDLVAHAGLDSAVYLRIYTLGLKIFLPITTLALLVLIPVNVSGGTLLDLRKEVVFSDIDKLSISNVSPGSNRFFIHLLMAYVFTFWVCFMLYKEYSNVAFMRLHFLASQKRCADHFTVIVRNIPRVSSHSTSETVDEFFRRNHPDHYLGHQPVYNANRYAKLVKQKERLQNWLDYYELKFERHPERRPTRRTGCLGFCGREVDQIDYYRARISELERRMTSERQKILNDPKAVMPVSFVTFDSRWGAAVCAQTQQSKNPTQWLTDWAPEPRDVYWQNLAIPFFSLSIRRFLMSVAVFALVFFYMIPIAFVQSLA…
>ZmOSCA2.1
MKISALLTSAGINIGLCVLFLSLYSVLRKQPANVRVYFGRRIAEEHDRLRGAFILERFVPSTGWIVKALQCTEEEILAAAGLDAVVFNRILVFSIRIFSLAAVLCVFGILPLNYFGQDIHHVRIPSESLDIFTIGNVEVKSRWLWVHCVTLYIISAVACILLYIEYKHIARLKLLHLTSATPKPNHFTVLVRGIPKADKESCSDVVDNFFTKYHSSSYLFHQVVYKVGKVQKIMTGAKKAYKKFKHFTDETVDQGCRTVTYRCCLCGASSNSFKLLNTECEQNKGKADNKSILDLDDEECTTAFVFFKTRYAALIASEILQTSNPMKWVANLAPEPEDVYWSNLWLPYKQLWARRIATLLGSIFFMFIFLIPVTFIQGLSQLEQLQQRLPFLRGILKKK…
>ZmOSCA2.2
MKVGGLLTSAGINIGLCVLFLSLYSILRKQPQNVKVYFGRRIAEEHNRLRDAFILERFVPSPSWIVKSLRCTEEEILATAGLDAVVFNRILVFSIRIFSLAAILCVFGVLPLNYFGQDMHHVRIPSASLETFTIGNVEERSRWLWVHCVVLYIISAVACILLYLEYKHIARLRLYHISRATSNPSHFTILVRGIPKSSTESFSRTVESFFTKYHASSYLSHQVVYKVGKVQKIVSGAKKVYRKFRHFKGATVDRRCRPIRFQCCFCGASSNSFQLLPSDYEQESEKSDVNESSSSLPDEECGAAFVFFKTRYAALVVAKILQTSNPMRWVTTLAPEPDDIYWSNLWLPYKQLWIRHIVTLMCSIVFMVVFLIPVTFIQGLTQLEQLQQRLPFLRGILKK…
>ZmOSCA2.3
MEFSALLTSAGINIAVCVLFLSLYSILRKQPHNFSVYFGRRLAEERFQRQDDYFSFERLLPTAGWIVKAYWCTEEEIRQVAGLDSVVFLRLFIFSIRIFSITSLVCVFVVLPVNYHGKEMNHNHIPEESLNVFTIANIVEESRKLWVHCSALYVITISACILLFHEYKYISRKRLAHVTGYPPNPGLFTVLVRSIPRFDNELLDDTIRNFFVNYHGSSYLSHQMIFRKGHFQKFVDRAERAYRRFVRVRLSVSERNGRSSMSRCGVCGVRASSFQLYRNKFIEAKKSDLTNPEVVEAQKNCPGALVFFKTRYAAVVASRVFQSSNPMLWVTDLAPEPRDVYWSNLWIPYRQIWLRKLATLAASIVFMFVFIVPVAFVQSMMQLEQLKRMFPSLTGLLNK…
>ZmOSCA2.4
MILSALTTSVGINLALTVLLAAAYSLLRRRPPYVEVYSPRRPYAPLEPWLAAAWRRAEEDIHAAAGLDGVVFIRIFVFSIRVFAAAAVLGVGVLLPVNFLGDQLREIDFTDLPNKSIDLFSISNVQDGSSKLWLHFSAVYIITGITCYLLYHEYKYISGKRLEYFMISKPLPQHFTVLVRAIPVSDGVSVGDAVDKFFKEYHASTYLSHTIVRQTGKLRRLLNDAESICTKLTNLNHVRRSTGDPPRKLGLFSRNDLVGEYQKRLEDLEENVRMEQSDATRRQEIPAAFVSFRSRYSAANAVYIRQSDNPTEWQTEEAPDPHDVYWPFFSTSFMERWIAKFVVFVASVLLILVFLLVVAFVQGLTYLEQLEKWLPFLRNILEIAVVSQLVTGYLPSVIL…
>ZmOSCA2.5
MDAEGLLASAAINLGLALVALSLFSLLKKQPGNAPVYRPRRMATGDLRADGGFLPLGHGRLTPSFRWIGAAFRLSEDDVLRRHGLDALVIVRLFKFGINCFSVCSIVGLLVLAPTNYTSEGRAEIRRSNSMELFTVTNVTRGSNRLWVHYSCLCFISLYVVYLLHKEYREITMRRIEHLKHHYKRYDQYTVLVRGIPTCPDHGAYGCYVDHFFSKHYRTYRSYQIVHDIGNIEALQKLASSIEKRIQRKRETSKCSLLGRIWSKFTSDATGIHNHEEKLKNVQDTIRLLQCENMLKQKEVPVAFVSFKSRLEAAQAAETQQLANPLSLVTTYAPEPTDTIWKNLSIPFWRMATYRLGVFAAAVLLTVFFTIPVTAVQGIAQFEKMKRWFPPARAVQLIP…
>ZmOSCA3.1
MVERSKSYRSLVRVCFTFLKTNECHFGYCPNTFYRSMVVTDHTKADKIYQEIEGHKQKIARAEVVYANSKTESNTEGTRPTHRTGFLGLIGTKVDTIEYCSEQIKELLPKLEAEQKTTLHEKQQRAAIVIFNSRSAVAFASQTLHAQVYDKWTVMEAPEPRQIIWSNLPMKLYDRQIRQSVVYGIVFLIVVFYMVSLTAIFAVTTLENLEKLPFLKPVVEQPAIKTVLEAYLPQIAPIICHMILLLFLF
>ZmOSCA4.1
MGPAAQPPDAGGGGDPEAWYGSIQYLINISAVGAASCVLLFLLVKLRFDHRRIPGPSALAAKLLAVYHATAAQIALHCGADAAQFLLFERASFLILAAVAAAAVAAALPLNLLAGDAAVVDQFASTTISHIPKSSPLLWLHLLLTAAVVAIAHLGISRMEDALRITRFRDGNGNPSDPNSSSVAVFTIMIQGIPKTLAADKTPLKDYFDHKYPGKVYRVIVPFDLCTLEHLVEQLGKVRNKISWLEARLGARDLFDDIVHDNDDTVQSEEHWFVRRCRGLWAMAGERLGFTDEERLRKLQTKKLVLASRLSDYKEGCAPGAGVAFVVFKDVYTANKAVKDFKMERKKTPIGRFFPVMELQLERSRWKVERAPPASDIYWNHLGLSKISSRLRRIAVNTC…

## Sheet: Table S4
Table S4. The MEME motif sequences of HvOSCAs.
Motif	Length(bp)	Sequence
MEME-1	50	MPAAFVSFKSRWGAAVCAQTQQTSNPTEWLTEWAPEPRDVYWSNLAIPYV
MEME-2	41	PLJLPFJLVYFALAYLVYRNQIJNVYNQKYESGGRFWPIVH
MEME-3	28	QSPKDIPRTJAVAIPMKATFFITYVMVD
MEME-4	35	YLLYKEYKHIATMRLAFLASEKRRPDQFTVLVRNI
MEME-5	28	TVEHFFLVNHPDHYLSHQVVYNANKLAK
MEME-6	50	WAGVAGEILRLKPLIIFHLKNFFLVKTEKDREEAMDPGSJGFNTTEPRIQ
MEME-7	21	FAVLRKQPINDRVYFPKWYLK
MEME-8	31	YLPFLNWMPAALKMPEPELJAHAGLDSVVYL
MEME-9	29	TJLFHKYCKNRFEPAFVKYPLQEAMDKDT
MEME-10	34	KJFLILLPTILMLMSKFEGFISVSSLERRAASKY

## Sheet: Table S5
Table S5. Cis-acting elements in HvOSCAs
Gene name	Element	Sequence	Annotation	Classification
HvOSCA1.1	AT-rich sequence	TAAAATACT	element for maximal elicitor-mediated activation (2copies)	stress responsive
HvOSCA1.1	TCT-motif	TCTTAC	part of a light responsive element	light responsive
HvOSCA1.1	Box 4	ATTAAT	part of a conserved DNA module involved in light responsiveness	light responsive
HvOSCA1.1	Sp1	GGGCGG	light responsive element	light responsive
HvOSCA1.1	TCCC-motif	TCTCCCT	part of a light responsive element	light responsive
HvOSCA1.1	MBS	CAACTG	MYB binding site involved in drought-inducibility	stress responsive
HvOSCA1.1	TGACG-motif	TGACG	cis-acting regulatory element involved in the MeJA-responsiveness	hormone responsive
HvOSCA1.1	GARE-motif	TCTGTTG	gibberellin-responsive element	hormone responsive
HvOSCA1.1	MRE	AACCTAA	MYB binding site involved in light responsiveness	light responsive
HvOSCA1.1	TCA-element	CCATCTTTTT	cis-acting element involved in salicylic acid responsiveness	hormone responsive
HvOSCA1.1	chs-CMA2a	TCACTTGA	part of a light responsive element	light responsive
HvOSCA1.1	CGTCA-motif	CGTCA	cis-acting regulatory element involved in the MeJA-responsiveness	hormone responsive
HvOSCA1.1	GT1-motif	GGTTAA	light responsive element	light responsive
HvOSCA1.1	GT1-motif	GGTTAA	light responsive element	light responsive
HvOSCA1.2	TCCC-motif	TCTCCCT	part of a light responsive element	light responsive
HvOSCA1.2	LTR	CCGAAA	cis-acting element involved in low-temperature responsiveness	hormone responsive
HvOSCA1.2	O2-site	GATGACATGG	cis-acting regulatory element involved in zein metabolism regulation	hormone responsive
HvOSCA1.2	G-Box	CACGTG	cis-acting regulatory element involved in light responsiveness	light responsive
HvOSCA1.2	G-Box	CACGTG	cis-acting regulatory element involved in light responsiveness	light responsive
HvOSCA1.2	MBS	CAACTG	MYB binding site involved in drought-inducibility	stress responsive
HvOSCA1.2	MBS	CAACTG	MYB binding site involved in drought-inducibility	stress responsive
HvOSCA1.2	chs-Unit 1 m1	ACCTAACCCGG	part of a light responsive element	light responsive
HvOSCA1.2	ABRE	AACCCGG	cis-acting element involved in the abscisic acid responsiveness	hormone responsive
HvOSCA1.2	ABRE	GACACGTGGC	cis-acting element involved in the abscisic acid responsiveness	hormone responsive
HvOSCA1.2	ABRE	CACGTG	cis-acting element involved in the abscisic acid responsiveness	hormone responsive
HvOSCA1.2	ABRE	ACGTG	cis-acting element involved in the abscisic acid responsiveness	hormone responsive
HvOSCA1.2	ABRE	GCCGCGTGGC	cis-acting element involved in the abscisic acid responsiveness	hormone responsive
HvOSCA1.2	ABRE	ACGTG	cis-acting element involved in the abscisic acid responsiveness	hormone responsive
HvOSCA1.2	ABRE	CACGTG	cis-acting element involved in the abscisic acid responsiveness	hormone responsive
HvOSCA1.2	ABRE	ACGTG	cis-acting element involved in the abscisic acid responsiveness	hormone responsive
HvOSCA1.2	ABRE	ACGTG	cis-acting element involved in the abscisic acid responsiveness	hormone responsive
HvOSCA1.3_1	Box 4	ATTAAT	part of a conserved DNA module involved in light responsiveness	light responsive
HvOSCA1.3_1	TCT-motif	TCTTAC	part of a light responsive element	light responsive
HvOSCA1.3_1	ARE	AAACCA	cis-acting regulatory element essential for the anaerobic induction	stress responsive
HvOSCA1.3_1	ARE	AAACCA	cis-acting regulatory element essential for the anaerobic induction	stress responsive
HvOSCA1.3_1	ARE	AAACCA	cis-acting regulatory element essential for the anaerobic induction	stress responsive
HvOSCA1.3_1	MBS	CAACTG	MYB binding site involved in drought-inducibility	stress responsive
HvOSCA1.3_1	O2-site	GATGA(C/T)(A/G)TG(A/G)	cis-acting regulatory element involved in zein metabolism regulation	hormone responsive
HvOSCA1.3_1	ABRE	GCAACGTGTC	cis-acting element involved in the abscisic acid responsiveness	hormone responsive
HvOSCA1.3_1	ABRE	ACGTG	cis-acting element involved in the abscisic acid responsiveness	hormone responsive
HvOSCA1.3_1	TGACG-motif	TGACG	cis-acting regulatory element involved in the MeJA-responsiveness	hormone responsive
HvOSCA1.3_1	CGTCA-motif	CGTCA	cis-acting regulatory element involved in the MeJA-responsiveness	hormone responsive
HvOSCA1.3_1	TCA-element	CCATCTTTTT	cis-acting element involved in salicylic acid responsiveness	hormone responsive
HvOSCA1.3_2	MBS	CAACTG	MYB binding site involved in drought-inducibility	stress responsive
HvOSCA1.3_2	MBS	CAACTG	MYB binding site involved in drought-inducibility	stress responsive
HvOSCA1.3_2	MBS	CAACTG	MYB binding site involved in drought-inducibility	stress responsive
HvOSCA1.3_2	MBS	CAACTG	MYB binding site involved in drought-inducibility	stress responsive
HvOSCA1.3_2	MBS	CAACTG	MYB binding site involved in drought-inducibility	stress responsive
HvOSCA1.3_2	ARE	AAACCA	cis-acting regulatory element essential for the anaerobic induction	stress responsive
HvOSCA1.3_2	ARE	AAACCA	cis-acting regulatory element essential for the anaerobic induction	stress responsive
HvOSCA1.3_2	Box II	ACACGTAGA	part of a light responsive element	light responsive
HvOSCA1.3_2	TCT-motif	TCTTAC	part of a light responsive element	light responsive
HvOSCA1.3_2	Box 4	ATTAAT	part of a conserved DNA module involved in light responsiveness	light responsive
HvOSCA1.3_2	Box 4	ATTAAT	part of a conserved DNA module involved in light responsiveness	light responsive
HvOSCA1.3_2	TGA-element	AACGAC	auxin-responsive element	hormone responsive
HvOSCA1.3_2	CGTCA-motif	CGTCA	cis-acting regulatory element involved in the MeJA-responsiveness	hormone responsive
HvOSCA1.3_2	CGTCA-motif	CGTCA	cis-acting regulatory element involved in the MeJA-responsiveness	hormone responsive
HvOSCA1.3_2	AuxRR-core	GGTCCAT	cis-acting regulatory element involved in auxin responsiveness	hormone responsive
HvOSCA1.3_2	TGACG-motif	TGACG	cis-acting regulatory element involved in the MeJA-responsiveness	hormone responsive
HvOSCA1.3_2	TGACG-motif	TGACG	cis-acting regulatory element involved in the MeJA-responsiveness	hormone responsive
HvOSCA1.3_2	ABRE	CGCACGTGTC	cis-acting element involved in the abscisic acid responsiveness	hormone responsive
HvOSCA1.3_2	ABRE	ACGTG	cis-acting element involved in the abscisic acid responsiveness	hormone responsive
HvOSCA1.4	TGA-element	AACGAC	auxin-responsive element	hormone responsive
HvOSCA1.4	TCA-element	CCATCTTTTT	cis-acting element involved in salicylic acid responsiveness	hormone responsive
HvOSCA1.4	CGTCA-motif	CGTCA	cis-acting regulatory element involved in the MeJA-responsiveness	hormone responsive
HvOSCA1.4	GT1-motif	GGTTAA	light responsive element	light responsive
HvOSCA1.4	TGACG-motif	TGACG	cis-acting regulatory element involved in the MeJA-responsiveness	hormone responsive
HvOSCA1.4	ABRE	ACGTG	cis-acting element involved in the abscisic acid responsiveness	hormone responsive
HvOSCA1.4	ABRE	ACGTG	cis-acting element involved in the abscisic acid responsiveness	hormone responsive
HvOSCA1.4	ABRE	ACGTG	cis-acting element involved in the abscisic acid responsiveness	hormone responsive
HvOSCA1.4	GARE-motif	TCTGTTG	gibberellin-responsive element	hormone responsive
HvOSCA1.4	GARE-motif	TCTGTTG	gibberellin-responsive element	hormone responsive
HvOSCA1.4	Sp1	GGGCGG	light responsive element	light responsive
HvOSCA1.4	LTR	CCGAAA	cis-acting element involved in low-temperature responsiveness	hormone responsive
HvOSCA1.4	LTR	CCGAAA	cis-acting element involved in low-temperature responsiveness	hormone responsive
HvOSCA1.4	MBS	CAACTG	MYB binding site involved in drought-inducibility	stress responsive
HvOSCA1.4	MBS	CAACTG	MYB binding site involved in drought-inducibility	stress responsive
HvOSCA1.4	Box II	ACACGTTGT	part of a light responsive element	light responsive
HvOSCA1.4	ARE	AAACCA	cis-acting regulatory element essential for the anaerobic induction	stress responsive
HvOSCA1.4	G-Box	CACGTT	cis-acting regulatory element involved in light responsiveness	light responsive
HvOSCA1.4	TCT-motif	TCTTAC	part of a light responsive element	light responsive
HvOSCA1.4	Box 4	ATTAAT	part of a conserved DNA module involved in light responsiveness	light responsive
HvOSCA1.4	Box 4	ATTAAT	part of a conserved DNA module involved in light responsiveness	light responsive
HvOSCA1.4	circadian	CAAAGATATC	cis-acting regulatory element involved in circadian control	Growth and biological process
HvOSCA2.1_1	TGACG-motif	TGACG	cis-acting regulatory element involved in the MeJA-responsiveness	hormone responsive
HvOSCA2.1_1	TGACG-motif	TGACG	cis-acting regulatory element involved in the MeJA-responsiveness	hormone responsive
HvOSCA2.1_1	TGACG-motif	TGACG	cis-acting regulatory element involved in the MeJA-responsiveness	hormone responsive
HvOSCA2.1_1	TGACG-motif	TGACG	cis-acting regulatory element involved in the MeJA-responsiveness	hormone responsive
HvOSCA2.1_1	TGACG-motif	TGACG	cis-acting regulatory element involved in the MeJA-responsiveness	hormone responsive
HvOSCA2.1_1	TGACG-motif	TGACG	cis-acting regulatory element involved in the MeJA-responsiveness	hormone responsive
HvOSCA2.1_1	TGACG-motif	TGACG	cis-acting regulatory element involved in the MeJA-responsiveness	hormone responsive
HvOSCA2.1_1	GC-motif	CCCCCG	enhancer-like element involved in anoxic specific inducibility	stress responsive
HvOSCA2.1_1	GC-motif	CCCCCG	enhancer-like element involved in anoxic specific inducibility	stress responsive
HvOSCA2.1_1	GC-motif	CCCCCG	enhancer-like element involved in anoxic specific inducibility	stress responsive
HvOSCA2.1_1	ABRE	ACGTG	cis-acting element involved in the abscisic acid responsiveness	hormone responsive
HvOSCA2.1_1	ABRE	ACGTG	cis-acting element involved in the abscisic acid responsiveness	hormone responsive
HvOSCA2.1_1	ABRE	ACGTG	cis-acting element involved in the abscisic acid responsiveness	hormone responsive
HvOSCA2.1_1	ABRE	GCCGCGTGGC	cis-acting element involved in the abscisic acid responsiveness	hormone responsive
HvOSCA2.1_1	ABRE	CACGTG	cis-acting element involved in the abscisic acid responsiveness	hormone responsive
HvOSCA2.1_1	ABRE	ACGTG	cis-acting element involved in the abscisic acid responsiveness	hormone responsive
HvOSCA2.1_1	CGTCA-motif	CGTCA	cis-acting regulatory element involved in the MeJA-responsiveness	hormone responsive
HvOSCA2.1_1	CGTCA-motif	CGTCA	cis-acting regulatory element involved in the MeJA-responsiveness	hormone responsive
HvOSCA2.1_1	CGTCA-motif	CGTCA	cis-acting regulatory element involved in the MeJA-responsiveness	hormone responsive
HvOSCA2.1_1	CGTCA-motif	CGTCA	cis-acting regulatory element involved in the MeJA-responsiveness	hormone responsive
HvOSCA2.1_1	CGTCA-motif	CGTCA	cis-acting regulatory element involved in the MeJA-responsiveness	hormone responsive
HvOSCA2.1_1	CGTCA-motif	CGTCA	cis-acting regulatory element involved in the MeJA-responsiveness	hormone responsive
HvOSCA2.1_1	CGTCA-motif	CGTCA	cis-acting regulatory element involved in the MeJA-responsiveness	hormone responsive
HvOSCA2.1_1	TCT-motif	TCTTAC	part of a light responsive element	light responsive
HvOSCA2.1_1	O2-site	GTTGACGTGA	cis-acting regulatory element involved in zein metabolism regulation	hormone responsive
HvOSCA2.1_1	O2-site	GTTGACGTGA	cis-acting regulatory element involved in zein metabolism regulation	hormone responsive
HvOSCA2.1_1	Sp1	GGGCGG	light responsive element	light responsive
HvOSCA2.1_1	TCCC-motif	TCTCCCT	part of a light responsive element	light responsive
HvOSCA2.1_1	LTR	CCGAAA	cis-acting element involved in low-temperature responsiveness	hormone responsive
HvOSCA2.1_1	MBS	CAACTG	MYB binding site involved in drought-inducibility	stress responsive
HvOSCA2.1_1	G-Box	CACGTG	cis-acting regulatory element involved in light responsiveness	light responsive
HvOSCA2.1_1	ARE	AAACCA	cis-acting regulatory element essential for the anaerobic induction	stress responsive
HvOSCA2.1_1	ARE	AAACCA	cis-acting regulatory element essential for the anaerobic induction	stress responsive
HvOSCA2.1_1	ARE	AAACCA	cis-acting regulatory element essential for the anaerobic induction	stress responsive
HvOSCA2.1_1	ARE	AAACCA	cis-acting regulatory element essential for the anaerobic induction	stress responsive
HvOSCA2.1_2	MBS	CAACTG	MYB binding site involved in drought-inducibility	stress responsive
HvOSCA2.1_2	MBS	CAACTG	MYB binding site involved in drought-inducibility	stress responsive
HvOSCA2.1_2	ARE	AAACCA	cis-acting regulatory element essential for the anaerobic induction	stress responsive
HvOSCA2.1_2	ARE	AAACCA	cis-acting regulatory element essential for the anaerobic induction	stress responsive
HvOSCA2.1_2	Sp1	GGGCGG	light responsive element	light responsive
HvOSCA2.1_2	Sp1	GGGCGG	light responsive element	light responsive
HvOSCA2.1_2	Sp1	GGGCGG	light responsive element	light responsive
HvOSCA2.1_2	O2-site	GATGA(C/T)(A/G)TG(A/G)	cis-acting regulatory element involved in zein metabolism regulation	hormone responsive
HvOSCA2.1_2	LTR	CCGAAA	cis-acting element involved in low-temperature responsiveness	hormone responsive
HvOSCA2.1_2	ATCT-motif	AATCTAATCC	part of a conserved DNA module involved in light responsiveness	light responsive
HvOSCA2.1_2	chs-CMA2a	TCACTTGA	part of a light responsive element	light responsive
HvOSCA2.1_2	GATA-motif	GATAGGA	part of a light responsive element	light responsive
HvOSCA2.1_2	GC-motif	CCCCCG	enhancer-like element involved in anoxic specific inducibility	stress responsive
HvOSCA2.1_2	GC-motif	CCCCCG	enhancer-like element involved in anoxic specific inducibility	stress responsive
HvOSCA2.1_2	ABRE	AACCCGG	cis-acting element involved in the abscisic acid responsiveness	hormone responsive
HvOSCA2.2	circadian	CAAAGATATC	cis-acting regulatory element involved in circadian control	Growth and biological process
HvOSCA2.2	MBS	CAACTG	MYB binding site involved in drought-inducibility	stress responsive
HvOSCA2.2	ARE	AAACCA	cis-acting regulatory element essential for the anaerobic induction	stress responsive
HvOSCA2.2	LTR	CCGAAA	cis-acting element involved in low-temperature responsiveness	hormone responsive
HvOSCA2.2	chs-CMA1a	TTACTTAA	part of a light responsive element	light responsive
HvOSCA2.2	AT-rich element	ATAGAAATCAA	binding site of AT-rich DNA binding protein (ATBP-1)	stress responsive
HvOSCA2.2	ABRE	ACGTG	cis-acting element involved in the abscisic acid responsiveness	hormone responsive
HvOSCA2.2	AuxRR-core	GGTCCAT	cis-acting regulatory element involved in auxin responsiveness	hormone responsive
HvOSCA2.2	ACE	GCGACGTACC	cis-acting element involved in light responsiveness	light responsive
HvOSCA2.2	TCA-element	TCAGAAGAGG	cis-acting element involved in salicylic acid responsiveness	hormone responsive
HvOSCA2.2	GATA-motif	GATAGGA	part of a light responsive element	light responsive
HvOSCA2.3	TGACG-motif	TGACG	cis-acting regulatory element involved in the MeJA-responsiveness	hormone responsive
HvOSCA2.3	TGACG-motif	TGACG	cis-acting regulatory element involved in the MeJA-responsiveness	hormone responsive
HvOSCA2.3	ABRE	TACGGTC	cis-acting element involved in the abscisic acid responsiveness	hormone responsive
HvOSCA2.3	CGTCA-motif	CGTCA	cis-acting regulatory element involved in the MeJA-responsiveness	hormone responsive
HvOSCA2.3	CGTCA-motif	CGTCA	cis-acting regulatory element involved in the MeJA-responsiveness	hormone responsive
HvOSCA2.3	WUN-motif	AAATTTCCT	wound-responsive element	stress responsive
HvOSCA2.3	TCT-motif	TCTTAC	part of a light responsive element	light responsive
HvOSCA2.3	TCT-motif	TCTTAC	part of a light responsive element	light responsive
HvOSCA2.3	TC-rich repeats	ATTCTCTAAC	cis-acting element involved in defense and stress responsiveness	stress responsive
HvOSCA2.3	Sp1	GGGCGG	light responsive element	light responsive
HvOSCA2.3	LTR	CCGAAA	cis-acting element involved in low-temperature responsiveness	hormone responsive
HvOSCA2.3	TCCC-motif	TCTCCCT	part of a light responsive element	light responsive
HvOSCA2.3	ARE	AAACCA	cis-acting regulatory element essential for the anaerobic induction	stress responsive
HvOSCA2.3	ARE	AAACCA	cis-acting regulatory element essential for the anaerobic induction	stress responsive
HvOSCA2.4	GATA-motif	AAGGATAAGG	part of a light responsive element	light responsive
HvOSCA2.4	CGTCA-motif	CGTCA	cis-acting regulatory element involved in the MeJA-responsiveness	hormone responsive
HvOSCA2.4	CGTCA-motif	CGTCA	cis-acting regulatory element involved in the MeJA-responsiveness	hormone responsive
HvOSCA2.4	CGTCA-motif	CGTCA	cis-acting regulatory element involved in the MeJA-responsiveness	hormone responsive
HvOSCA2.4	CGTCA-motif	CGTCA	cis-acting regulatory element involved in the MeJA-responsiveness	hormone responsive
HvOSCA2.4	ABRE	ACGTG	cis-acting element involved in the abscisic acid responsiveness	hormone responsive
HvOSCA2.4	ABRE	CACGTG	cis-acting element involved in the abscisic acid responsiveness	hormone responsive
HvOSCA2.4	ABRE	ACGTG	cis-acting element involved in the abscisic acid responsiveness	hormone responsive
HvOSCA2.4	ABRE	GCCGCGTGGC	cis-acting element involved in the abscisic acid responsiveness	hormone responsive
HvOSCA2.4	ABRE	GCCGCGTGGC	cis-acting element involved in the abscisic acid responsiveness	hormone responsive
HvOSCA2.4	TGACG-motif	TGACG	cis-acting regulatory element involved in the MeJA-responsiveness	hormone responsive
HvOSCA2.4	TGACG-motif	TGACG	cis-acting regulatory element involved in the MeJA-responsiveness	hormone responsive
HvOSCA2.4	TGACG-motif	TGACG	cis-acting regulatory element involved in the MeJA-responsiveness	hormone responsive
HvOSCA2.4	TGACG-motif	TGACG	cis-acting regulatory element involved in the MeJA-responsiveness	hormone responsive
HvOSCA2.4	GC-motif	CCCCCG	enhancer-like element involved in anoxic specific inducibility	stress responsive
HvOSCA2.4	O2-site	GATGATGTGG	cis-acting regulatory element involved in zein metabolism regulation	hormone responsive
HvOSCA2.4	Sp1	GGGCGG	light responsive element	light responsive
HvOSCA2.4	Sp1	GGGCGG	light responsive element	light responsive
HvOSCA2.4	Sp1	GGGCGG	light responsive element	light responsive
HvOSCA2.4	G-Box	CACGTG	cis-acting regulatory element involved in light responsiveness	light responsive
HvOSCA2.4	ARE	AAACCA	cis-acting regulatory element essential for the anaerobic induction	stress responsive
HvOSCA2.4	MBS	CAACTG	MYB binding site involved in drought-inducibility	stress responsive
HvOSCA2.4	Box 4	ATTAAT	part of a conserved DNA module involved in light responsiveness	light responsive
HvOSCA2.4	AT-rich sequence	TAAAATACT	element for maximal elicitor-mediated activation (2copies)	stress responsive
HvOSCA2.4	TCT-motif	TCTTAC	part of a light responsive element	light responsive
HvOSCA2.4	TCT-motif	TCTTAC	part of a light responsive element	light responsive
HvOSCA2.4	4cl-CMA1b	ATTCCGATAAACT	light responsive element	light responsive
HvOSCA2.5	Sp1	GGGCGG	light responsive element	light responsive
HvOSCA2.5	TCCC-motif	TCTCCCT	part of a light responsive element	light responsive
HvOSCA2.5	TCCC-motif	TCTCCCT	part of a light responsive element	light responsive
HvOSCA2.5	LTR	CCGAAA	cis-acting element involved in low-temperature responsiveness	hormone responsive
HvOSCA2.5	LTR	CCGAAA	cis-acting element involved in low-temperature responsiveness	hormone responsive
HvOSCA2.5	MBS	CAACTG	MYB binding site involved in drought-inducibility	stress responsive
HvOSCA2.5	MSA-like	(T/C)C(T/C)AACGG(T/C)(T/C)A	cis-acting element involved in cell cycle regulation	Growth and biological process
HvOSCA2.5	ARE	AAACCA	cis-acting regulatory element essential for the anaerobic induction	stress responsive
HvOSCA2.5	ARE	AAACCA	cis-acting regulatory element essential for the anaerobic induction	stress responsive
HvOSCA2.5	G-Box	CACGTT	cis-acting regulatory element involved in light responsiveness	light responsive
HvOSCA2.5	Box 4	ATTAAT	part of a conserved DNA module involved in light responsiveness	light responsive
HvOSCA2.5	MRE	AACCTAA	MYB binding site involved in light responsiveness	light responsive
HvOSCA2.5	GATA-motif	AAGGATAAGG	part of a light responsive element	light responsive
HvOSCA2.5	CGTCA-motif	CGTCA	cis-acting regulatory element involved in the MeJA-responsiveness	hormone responsive
HvOSCA2.5	GT1-motif	GGTTAA	light responsive element	light responsive
HvOSCA2.5	GC-motif	CCCCCG	enhancer-like element involved in anoxic specific inducibility	stress responsive
HvOSCA2.5	GC-motif	CCCCCG	enhancer-like element involved in anoxic specific inducibility	stress responsive
HvOSCA2.5	GC-motif	CCCCCG	enhancer-like element involved in anoxic specific inducibility	stress responsive
HvOSCA2.5	GC-motif	CCCCCG	enhancer-like element involved in anoxic specific inducibility	stress responsive
HvOSCA2.5	GC-motif	CCCCCG	enhancer-like element involved in anoxic specific inducibility	stress responsive
HvOSCA2.5	TGACG-motif	TGACG	cis-acting regulatory element involved in the MeJA-responsiveness	hormone responsive
HvOSCA2.5	ABRE	ACGTG	cis-acting element involved in the abscisic acid responsiveness	hormone responsive
HvOSCA2.5	ABRE	GCAACGTGTC	cis-acting element involved in the abscisic acid responsiveness	hormone responsive
HvOSCA2.5	ABRE	ACGTG	cis-acting element involved in the abscisic acid responsiveness	hormone responsive
HvOSCA2.5	ABRE	ACGTG	cis-acting element involved in the abscisic acid responsiveness	hormone responsive
HvOSCA2.5	ABRE	ACGTG	cis-acting element involved in the abscisic acid responsiveness	hormone responsive
HvOSCA3.1	TCT-motif	TCTTAC	part of a light responsive element	light responsive
HvOSCA3.1	Box 4	ATTAAT	part of a conserved DNA module involved in light responsiveness	light responsive
HvOSCA3.1	G-Box	CACGTT	cis-acting regulatory element involved in light responsiveness	light responsive
HvOSCA3.1	G-Box	CACGTT	cis-acting regulatory element involved in light responsiveness	light responsive
HvOSCA3.1	Sp1	GGGCGG	light responsive element	light responsive
HvOSCA3.1	TCCC-motif	TCTCCCT	part of a light responsive element	light responsive
HvOSCA3.1	LTR	CCGAAA	cis-acting element involved in low-temperature responsiveness	hormone responsive
HvOSCA3.1	Pc-CMA2c	GCCCACGCA	part of a light responsive element	light responsive
HvOSCA3.1	TGACG-motif	TGACG	cis-acting regulatory element involved in the MeJA-responsiveness	hormone responsive
HvOSCA3.1	TGACG-motif	TGACG	cis-acting regulatory element involved in the MeJA-responsiveness	hormone responsive
HvOSCA3.1	GC-motif	CCCCCG	enhancer-like element involved in anoxic specific inducibility	stress responsive
HvOSCA3.1	GC-motif	CCCCCG	enhancer-like element involved in anoxic specific inducibility	stress responsive
HvOSCA3.1	GC-motif	CCCCCG	enhancer-like element involved in anoxic specific inducibility	stress responsive
HvOSCA3.1	GC-motif	CCCCCG	enhancer-like element involved in anoxic specific inducibility	stress responsive
HvOSCA3.1	ABRE	ACGTG	cis-acting element involved in the abscisic acid responsiveness	hormone responsive
HvOSCA3.1	ABRE	ACGTG	cis-acting element involved in the abscisic acid responsiveness	hormone responsive
HvOSCA3.1	ABRE	ACGTG	cis-acting element involved in the abscisic acid responsiveness	hormone responsive
HvOSCA3.1	ABRE	GCCGCGTGGC	cis-acting element involved in the abscisic acid responsiveness	hormone responsive
HvOSCA3.1	ABRE	ACGTG	cis-acting element involved in the abscisic acid responsiveness	hormone responsive
HvOSCA3.1	ABRE	ACGTG	cis-acting element involved in the abscisic acid responsiveness	hormone responsive
HvOSCA3.1	CGTCA-motif	CGTCA	cis-acting regulatory element involved in the MeJA-responsiveness	hormone responsive
HvOSCA3.1	CGTCA-motif	CGTCA	cis-acting regulatory element involved in the MeJA-responsiveness	hormone responsive
HvOSCA3.1	ACE	GACACGTATG	cis-acting element involved in light responsiveness	light responsive
HvOSCA3.1	TGA-element	AACGAC	auxin-responsive element	hormone responsive
HvOSCA3.1	TGA-element	AACGAC	auxin-responsive element	hormone responsive
HvOSCA3.1	TGA-element	AACGAC	auxin-responsive element	hormone responsive
HvOSCA3.1	GATA-motif	AAGGATAAGG	part of a light responsive element	light responsive
HvOSCA4.1	O2-site	GATGACATGG	cis-acting regulatory element involved in zein metabolism regulation	hormone responsive
HvOSCA4.1	Sp1	GGGCGG	light responsive element	light responsive
HvOSCA4.1	Sp1	GGGCGG	light responsive element	light responsive
HvOSCA4.1	LTR	CCGAAA	cis-acting element involved in low-temperature responsiveness	hormone responsive
HvOSCA4.1	MBS	CAACTG	MYB binding site involved in drought-inducibility	stress responsive
HvOSCA4.1	G-Box	TCCACATGGCA	cis-acting regulatory element involved in light responsiveness	light responsive
HvOSCA4.1	ARE	AAACCA	cis-acting regulatory element essential for the anaerobic induction	stress responsive
HvOSCA4.1	ARE	AAACCA	cis-acting regulatory element essential for the anaerobic induction	stress responsive
HvOSCA4.1	TGACG-motif	TGACG	cis-acting regulatory element involved in the MeJA-responsiveness	hormone responsive
HvOSCA4.1	TGACG-motif	TGACG	cis-acting regulatory element involved in the MeJA-responsiveness	hormone responsive
HvOSCA4.1	TGACG-motif	TGACG	cis-acting regulatory element involved in the MeJA-responsiveness	hormone responsive
HvOSCA4.1	TGACG-motif	TGACG	cis-acting regulatory element involved in the MeJA-responsiveness	hormone responsive
HvOSCA4.1	TGACG-motif	TGACG	cis-acting regulatory element involved in the MeJA-responsiveness	hormone responsive
HvOSCA4.1	GARE-motif	TCTGTTG	gibberellin-responsive element	hormone responsive
HvOSCA4.1	3-AF3 binding site	CACTATCTAAC	part of a conserved DNA module array (CMA3)	light responsive
HvOSCA4.1	GATA-motif	AAGATAAGATT	part of a light responsive element	light responsive
HvOSCA4.1	CGTCA-motif	CGTCA	cis-acting regulatory element involved in the MeJA-responsiveness	hormone responsive
HvOSCA4.1	CGTCA-motif	CGTCA	cis-acting regulatory element involved in the MeJA-responsiveness	hormone responsive
HvOSCA4.1	CGTCA-motif	CGTCA	cis-acting regulatory element involved in the MeJA-responsiveness	hormone responsive
HvOSCA4.1	CGTCA-motif	CGTCA	cis-acting regulatory element involved in the MeJA-responsiveness	hormone responsive
HvOSCA4.1	CGTCA-motif	CGTCA	cis-acting regulatory element involved in the MeJA-responsiveness	hormone responsive
HvOSCA1.1	AT-rich sequence	TAAAATACT	element for maximal elicitor-mediated activation (2copies)	stress responsive
HvOSCA1.1	P-box	CCTTTTG	gibberellin-responsive element	hormone responsive
HvOSCA1.3_1	P-box	CCTTTTG	gibberellin-responsive element	hormone responsive
HvOSCA1.3_2	P-box	CCTTTTG	gibberellin-responsive element	hormone responsive
HvOSCA2.1_1	P-box	CCTTTTG	gibberellin-responsive element	hormone responsive
HvOSCA2.1_2	P-box	CCTTTTG	gibberellin-responsive element	hormone responsive
HvOSCA2.3	P-box	CCTTTTG	gibberellin-responsive element	hormone responsive

## Sheet: Table S6
Table S6. Sample information of the previous open access RNA-seq data in NCBI SRA database.
Stage	Accession number	Tissue	Treatment	sample information			Symbol in heatmap
				Sampled time	Rep	Batch
Developmental stage	ERR1457191	Embryos	Exfoliated from germinating seeds	4d	rep 1	1	EMB
	ERR1457166	Embryos	Exfoliated from germinating seeds	4d	rep 1	2	EMB
	ERR1457192	Embryos	Exfoliated from germinating seeds	4d	rep 2	1	EMB
	ERR1457167	Embryos	Exfoliated from germinating seeds	4d	rep 2	2	EMB
	ERR1457193	Embryos	Exfoliated from germinating seeds	4d	rep 3	1	EMB
	ERR1457168	Embryos	Exfoliated from germinating seeds	4d	rep 3	2	EMB
	ERR1457194	Roots of the seedlings		10cm shoot stage	rep 1	1	ROO2
	ERR1457169	Roots of the seedlings		10cm shoot stage	rep 1	2	ROO2
	ERR1457195	Rootsof the seedlings		10cm shoot stage	rep 2	1	ROO2
	ERR1457170	Rootsof the seedlings		10cm shoot stage	rep 2	2	ROO2
	ERR1457196	Rootsof the seedlings		10cm shoot stage	rep 3	1	ROO2
	ERR1457171	Rootsof the seedlings		10cm shoot stage	rep 3	2	ROO2
	ERR1457230	Root		4 weeks	rep 1	1	ROO
	ERR1457254	Root		4 weeks	rep 1	2	ROO
	ERR1457231	Root		4 weeks	rep 2	1	ROO
	ERR1457255	Root		4 weeks	rep 2	2	ROO
	ERR1457232	Root		4 weeks	rep 3	1	ROO
	ERR1457256	Root		4 weeks	rep 3	2	ROO
	ERR1457200	Shoot of the seedlings		10cm shoot stage	rep 1	1	LEA
	ERR1457175	Shoot of the seedlings		10cm shoot stage	rep 1	2	LEA
	ERR1457201	Shoot of the seedlings		10cm shoot stage	rep 2	1	LEA
	ERR1457176	Shoot of the seedlings		10cm shoot stage	rep 2	2	LEA
	ERR1457202	Shoot of the seedlings		10cm shoot stage	rep 3	1	LEA
	ERR1457177	Shoot of the seedlings		10cm shoot stage	rep 3	2	LEA
	ERR1457212	Etiolated seedling		10 day old seedling	rep 1	1	ETI
	ERR1457236	Etiolated seedling		10 day old seedling	rep 1	2	ETI
	ERR1457213	Etiolated seedling		10 day old seedling	rep 2	1	ETI
	ERR1457237	Etiolated seedling		10 day old seedling	rep 2	2	ETI
	ERR1457214	Etiolated seedling		10 day old seedling	rep 3	1	ETI
	ERR1457238	Etiolated seedling		10 day old seedling	rep 3	2	ETI
	ERR1457206	Developing tillers		sixthleaf	rep 1	1	NOD
	ERR1457181	Developing tillers		sixthleaf	rep 1	2	NOD
	ERR1457207	Developing tillers		sixthleaf	rep 2	1	NOD
	ERR1457182	Developing tillers		sixthleaf	rep 2	2	NOD
	ERR1457187	Developing tillers		sixthleaf	rep 2	2	NOD
	ERR1457208	Developing tillers		sixthleaf	rep 3	1	NOD
	ERR1457183	Developing tillers		sixthleaf	rep 3	2	NOD
Reproductive stage	ERR1457209	Young Inflorescences		5mm	rep 1	1	INF1
	ERR1457184	Young Inflorescences		5mm	rep 1	2	INF1
	ERR1457210	Young Inflorescences		5mm	rep 2	1	INF1
	ERR1457185	Young Inflorescences		5mm	rep 2	2	INF1
	ERR1457211	Young Inflorescences		5mm	rep 3	1	INF1
	ERR1457186	Young Inflorescences		5mm	rep 3	2	INF1
	ERR1457203	Inflorescences		1-1.5cm	rep 1	1	INF2
	ERR1457178	Inflorescences		1-1.5cm	rep 1	2	INF2
	ERR1457204	Inflorescences		1-1.5cm	rep 2	1	INF2
	ERR1457179	Inflorescences		1-1.5cm	rep 2	2	INF2
	ERR1457205	Inflorescences		1-1.5cm	rep 3	1	INF2
	ERR1457180	Inflorescences		1-1.5cm	rep 3	2	INF2
	ERR1457233	Senescing leaf		2 months	rep 1	1	SEN
	ERR1457257	Senescing leaf		2 months	rep 1	2	SEN
	ERR1457234	Senescing leaf		2 months	rep 2	1	SEN
	ERR1457258	Senescing leaf		2 months	rep 2	2	SEN
	ERR1457235	Senescing leaf		2 months	rep 3	1	SEN
	ERR1457259	Senescing leaf		2 months	rep 3	2	SEN
	ERR1457197	Grain	bracts removed	15DPA	rep 1	1	CAR15
	ERR1457172	Grain	bracts removed	15DPA	rep 1	2	CAR15
	ERR1457198	Grain	bracts removed	15DPA	rep 2	1	CAR15
	ERR1457173	Grain	bracts removed	15DPA	rep 2	2	CAR15
	ERR1457199	Grain	bracts removed	15DPA	rep 4	1	CAR15
	ERR1457174	Grain	bracts removed	15DPA	rep 4	2	CAR15
	ERR1457188	Grain	bracts removed	5DPA	rep 2	1	CAR5
	ERR1457163	Grain	bracts removed	5DPA	rep 2	2	CAR5
	ERR1457189	Grain	bracts removed	5DPA	rep 3	1	CAR5
	ERR1457164	Grain	bracts removed	5DPA	rep 3	2	CAR5
	ERR1457190	Grain	bracts removed	5DPA	rep 4	1	CAR5
	ERR1457165	Grain	bracts removed	5DPA	rep 4	2	CAR5
	ERR1457224	Epidermis		4 weeks	rep1	1	EPI
	ERR1457248	Epidermis		4 weeks	rep1	2	EPI
	ERR1457225	Epidermis		4 weeks	rep2	1	EPI
	ERR1457249	Epidermis		4 weeks	rep2	2	EPI
	ERR1457226	Epidermis		4 weeks	rep3	1	EPI
	ERR1457250	Epidermis		4 weeks	rep3	2	EPI
	ERR1457215	Lemma		6 weeks PA	rep 1	1	LEM
	ERR1457239	Lemma		6 weeks PA	rep 1	2	LEM
	ERR1457216	Lemma		6 weeks PA	rep 2	1	LEM
	ERR1457240	Lemma		6 weeks PA	rep 2	2	LEM
	ERR1457217	Lemma		6 weeks PA	rep 3	1	LEM
	ERR1457241	Lemma		6 weeks PA	rep 3	2	LEM
	ERR1457218	Lodicule		6 weeks PA	rep 1	1	LOD
	ERR1457242	Lodicule		6 weeks PA	rep 1	2	LOD
	ERR1457219	Lodicule		6 weeks PA	rep 2	1	LOD
	ERR1457243	Lodicule		6 weeks PA	rep 2	2	LOD
	ERR1457220	Lodicule		6 weeks PA	rep 3	1	LOD
	ERR1457244	Lodicule		6 weeks PA	rep 3	2	LOD
	ERR1457221	Palea		6 weeks PA	rep 1	1	PAL
	ERR1457245	Palea		6 weeks PA	rep 1	2	PAL
	ERR1457222	Palea		6 weeks PA	rep 2	1	PAL
	ERR1457246	Palea		6 weeks PA	rep 2	2	PAL
	ERR1457223	Palea		6 weeks PA	rep 3	1	PAL
	ERR1457247	Palea		6 weeks PA	rep 3	2	PAL
	ERR1457227	Rachis		5 weeks PA	rep 1	1	RAC
	ERR1457251	Rachis		5 weeks PA	rep 1	2	RAC
	ERR1457228	Rachis		5 weeks PA	rep 2	1	RAC
	ERR1457252	Rachis		5 weeks PA	rep 2	2	RAC
	ERR1457229	Rachis		5 weeks PA	rep 3	1	RAC
	ERR1457253	Rachis		5 weeks PA	rep 3	2	RAC
Abiiotic stress	ERR1366270	Root	CK of Salt treatment	Zone of cell divesion	rep 2	1	CK_mer
	ERR1366274	Root	CK of Salt treatment	Zone of cell divesion	rep 3	1	CK_mer
	ERR1366278	Root	CK of Salt treatment	Zone of cell divesion	rep 4	1	CK_mer
	ERR1366330	Root	100mM NaCl	Zone of cell divesion	rep 1	1	NaCl_mer
	ERR1366334	Root	100mM NaCl	Zone of cell divesion	rep 2	1	NaCl_mer
	ERR1366338	Root	100mM NaCl	Zone of cell divesion	rep 3	1	NaCl_mer
	ERR1366342	Root	100mM NaCl	Zone of cell divesion	rep 4	1	NaCl_mer
	ERR1366314	Root	100mM NaCl	Zone of cell elongation	rep 1	1	CK_elo
	ERR1366318	Root	100mM NaCl	Zone of cell elongation	rep 2	1	CK_elo
	ERR1366322	Root	100mM NaCl	Zone of cell elongation	rep 3	1	CK_elo
	ERR1366326	Root	100mM NaCl	Zone of cell elongation	rep 4	1	CK_elo
	ERR1366298	Root	CK of Salt treatment	Zone of cell elongation	rep 1	1	NaCl_elo
	ERR1366302	Root	CK of Salt treatment	Zone of cell elongation	rep 2	1	NaCl_elo
	ERR1366306	Root	CK of Salt treatment	Zone of cell elongation	rep 3	1	NaCl_elo
	ERR1366310	Root	CK of Salt treatment	Zone of cell elongation	rep 4	1	NaCl_elo
	ERR1366282	Root	CK of Salt treatment	Zone of cell maturation	rep 1	1	CK_mat
	ERR1366286	Root	CK of Salt treatment	Zone of cell maturation	rep 2	1	CK_mat
	ERR1366290	Root	CK of Salt treatment	Zone of cell maturation	rep 3	1	CK_mat
	ERR1366294	Root	CK of Salt treatment	Zone of cell maturation	rep 4	1	CK_mat
	ERR1366346	Root	100mM NaCl	Zone of cell maturation	rep 1	1	NaCl_mat
	ERR1366350	Root	100mM NaCl	Zone of cell maturation	rep 2	1	NaCl_mat
	ERR1366354	Root	100mM NaCl	Zone of cell maturation	rep 3	1	NaCl_mat
	ERR1366358	Root	100mM NaCl	Zone of cell maturation	rep 4	1	NaCl_mat
	ERR1744565	Root	CK of cold treatment(17 ℃)	12 day length	rep 1	1	CK_Cold
	ERR1744566	Root	CK of cold treatment(18 ℃)	12 day length	rep 2	1	CK_Cold
	ERR1744570	Root	cold treatment(6 ℃)	8 day length	rep 1	1	Cold_treatment
	ERR1744574	Root	cold treatment(6 ℃)	8 day length	rep 2	1	Cold_treatment
	SRR5452107	Root	CK of cadmium ion treatment	7 days	rep 1	1	CK_Cd
	SRR5452105	Root	CK of cadmium ion treatment	7 days	rep 2	1	CK_Cd
	SRR5452103	Root	CK of cadmium ion treatment	7 days	rep 3	1	CK_Cd
	SRR5452101	Root	80 µM Cd	7 days	rep 1	1	Cd_treatment
	SRR5452099	Root	80 µM Cd	7 days	rep 2	1	Cd_treatment
	SRR5452097	Root	80 µM Cd	7 days	rep 3	1	Cd_treatment
	SRR5452131	Root	CK of copper ion treatment	7 days	rep 1	1	CK_Cu
	SRR5452129	Root	CK of copper ion treatment	7 days	rep 2	1	CK_Cu
	SRR5452127	Root	CK of copper ion treatment	7 days	rep 3	1	CK_Cu
	SRR5452125	Root	50 µM Cu	7 days	rep 1	1	Cu_treatment
	SRR5452123	Root	50 µM Cu	7 days	rep 2	1	Cu_treatment
	SRR5452121	Root	50 µM Cu	7 days	rep 3	1	Cu_treatment
	SRR5452119	Root	CK of zinc ion treatment	7 days	rep 1	1	Zn_CK
	SRR5452117	Root	CK of zinc ion treatment	7 days	rep 2	1	Zn_CK
	SRR5452115	Root	CK of zinc ion treatment	7 days	rep 3	1	Zn_CK
	SRR5452113	Root	570 µM Zn	7 days	rep 1	1	Zn_treatment
	SRR5452111	Root	570 µM Zn	7 days	rep 2	1	Zn_treatment
	SRR5452109	Root	570 µM Zn	7 days	rep 3	1	Zn_treatment

## Sheet: Table S7
Table S7. The spatio-temporal expression profile of HvOSCAs at different tissues/stages of barley.
Gene Name	CAR15	CAR5	EMB	EPI	ETI	INF1	INF2	LEA	LEM	LOD	NOD	PAL	RAC	ROO	ROO2	SEN	Cold_CK	Cold_treatment	CK_mer	CK_elo	CK_mat	NaCl_mer	NaCl_elo	NaCL_mat	Cd_CK	Cd_treatment	Cu_CK	Cu_treatment	Zn_CK	Zn_treatment
HvOSCA1.1	3.94246	6.37727	6.10931	3.76842	4.86624	5.88666	6.08453	5.43014	5.65921	6.72387	5.3189	6.22746	6.47902	5.83189	5.47473	4.90319	3.4429	4.68042	5.20836	5.1119	6.7722	6.57589	6.08539	6.01587	6.39539	6.0501	6.11014	5.63091	6.30288	6.05057
HvOSCA1.2	0.186618	0.971369	2.68681	0	0	3.57912	3.44861	1.13371	0	0.164941	0.0154619	0.0160037	1.29815	2.4905	1.57364	0	0	0	3.82873	3.65035	0.244405	0.78002	2.62189	1.37881	1.58131	0.356138	1.71787	0.850712	1.57711	1.60575
HvOSCA1.3_1	0	0.0491052	0.0070742	0.0658423	0.050087	0.0574332	0.0111867	0	1.80446	0.13578	0	2.58394	0	0.00330047	0	0.103113	0.0415864	0.0402823	0	0	0	0	0	0.0174057	0	0	0	0	0	0
HvOSCA1.3_2	0	0.44292	1.91003	0.404516	0.25489	0.0278429	0.0923015	1.5993	0.118608	0.011701	0.0163936	0.0512048	0.0736567	2.2066	1.31901	2.88307	1.62342	2.99037	1.36985	1.34827	4.12332	4.19186	2.97282	2.46836	3.22184	1.84892	2.52154	1.28068	1.87732	2.03816
HvOSCA1.4	4.14808	6.27179	4.30362	3.31059	2.21855	3.74989	3.72719	2.86092	3.8689	7.38307	2.17066	4.25959	4.91937	4.69745	3.92628	1.42091	1.32344	0.864704	3.98635	4.10478	5.04678	5.04317	4.35688	4.17296	4.51405	4.38273	4.48576	4.39482	4.19914	4.33004
HvOSCA2.1_1	2.29699	2.31187	2.77955	4.45113	4.47557	2.33614	2.7595	3.80386	4.88297	6.56054	3.09874	4.12779	3.25158	4.06473	3.37434	4.09577	2.67245	3.50325	1.56177	1.67117	3.4143	3.39363	3.4459	3.40619	3.79602	4.4605	3.56764	4.03817	3.75008	3.50558
HvOSCA2.1_2	1.01922	3.18064	2.71355	5.82836	5.18237	3.41864	3.67887	4.78306	4.32496	4.53273	5.16237	4.3202	4.09295	2.55837	2.05127	3.63642	4.93796	5.88731	2.14653	2.17292	3.98637	3.56705	3.20088	3.00276	2.94756	1.74802	3.02044	2.75717	3.414	2.53643
HvOSCA2.2	5.6589	3.11255	3.95565	3.76726	3.89952	3.77725	4.54014	4.17217	5.11143	3.1736	5.35453	4.70429	5.56554	5.21302	4.21362	3.13148	3.52426	2.3849	3.22244	3.29765	5.33668	4.79727	5.53163	6.0012	5.37551	5.83978	5.53879	6.26343	5.35125	5.16767
HvOSCA2.3	0.504115	0	0	0	0	0	0	0.0128223	1.92107	0.103687	0	2.92204	0.0209229	0	0	0	0	0	0	0	0	0	0	0	0	0	0	0	0	0
HvOSCA2.4	3.5153	4.21019	3.82949	6.48461	5.15544	3.21185	2.9887	5.06752	5.46983	4.10088	5.58927	5.29415	4.66412	4.65874	4.62873	5.01066	5.14612	5.81224	3.25734	3.27066	4.10938	4.07086	4.97592	5.46666	5.20399	5.40867	4.97873	5.60141	5.19076	4.88981
HvOSCA2.5	2.33503	0.531452	0.388164	0	0	0	0.00568718	0	0.446615	0.392192	0	0.839057	0.134678	0	0.0799606	0.0151474	0	0	0.0686268	0.0900868	0.0732849	0.159995	0.236098	1.45304	0	0.0200434	0	0.14236	0	0.0144481
HvOSCA3.1	2.59138	5.27435	5.81617	7.44348	5.15009	5.63368	5.23909	5.83592	9.13796	7.34784	7.38386	8.67077	7.10929	6.83393	5.81472	4.15185	4.6195	4.17305	5.25712	5.09337	7.66319	7.25965	6.58551	6.56524	6.67562	6.0853	6.38782	5.99158	6.55453	5.65141
HvOSCA4.1	3.4368	4.13768	3.66733	3.38215	4.0277	3.76762	3.73866	3.75752	3.70034	4.48526	3.76812	3.72504	3.95404	3.59386	3.98266	3.28855	3.22623	3.66136	3.67938	3.67606	3.51686	3.39266	3.55934	3.56741	3.98644	4.75049	3.83797	3.99266	3.87618	4.13253

## Sheet: Table S8
Table S8. The expression matrix of each HvOSCAs under different stresses.
Gene	CK_Cold	Cold_treatment	CK_mer	NaCl_mer	CK_elo	NaCl_elo	CK_mat	NaCL_mat	CK_Cd	Cd_treatment	CK_Cu	Cu_treatment	CK_Zn	Zn_treatment
HvOSCA1.1	3.4429	4.68042	5.20836	6.57589	5.1119	6.08539	6.7722	6.01587	6.39539	6.0501	6.11014	5.63091	6.30288	6.05057
HvOSCA1.2	0	0	3.82873	0.78002	3.65035	2.62189	0.244405	1.37881	1.58131	0.356138	1.71787	0.850712	1.57711	1.60575
HvOSCA1.3_1	0.0415864	0.0402823	0	0	0	0	0	0.0174057	0	0	0	0	0	0
HvOSCA1.3_2	1.62342	2.99037	1.36985	4.19186	1.34827	2.97282	4.12332	2.46836	3.22184	1.84892	2.52154	1.28068	1.87732	2.03816
HvOSCA1.4	1.32344	0.864704	3.98635	5.04317	4.10478	4.35688	5.04678	4.17296	4.51405	4.38273	4.48576	4.39482	4.19914	4.33004
HvOSCA2.1_1	2.67245	3.50325	1.56177	3.39363	1.67117	3.4459	3.4143	3.40619	3.79602	4.4605	3.56764	4.03817	3.75008	3.50558
HvOSCA2.1_2	4.93796	5.88731	2.14653	3.56705	2.17292	3.20088	3.98637	3.00276	2.94756	1.74802	3.02044	2.75717	3.414	2.53643
HvOSCA2.2	3.52426	2.3849	3.22244	4.79727	3.29765	5.53163	5.33668	6.0012	5.37551	5.83978	5.53879	6.26343	5.35125	5.16767
HvOSCA2.3	0	0	0	0	0	0	0	0	0	0	0	0	0	0
HvOSCA2.4	5.14612	5.81224	3.25734	4.07086	3.27066	4.97592	4.10938	5.46666	5.20399	5.40867	4.97873	5.60141	5.19076	4.88981
HvOSCA2.5	0	0	0.0686268	0.159995	0.0900868	0.236098	0.0732849	1.45304	0	0.0200434	0	0.14236	0	0.0144481
HvOSCA3.1	4.6195	4.17305	5.25712	7.25965	5.09337	6.58551	7.66319	6.56524	6.67562	6.0853	6.38782	5.99158	6.55453	5.65141
HvOSCA4.1	3.22623	3.66136	3.67938	3.39266	3.67606	3.55934	3.51686	3.56741	3.98644	4.75049	3.83797	3.99266	3.87618	4.13253

## Sheet: Table S9
Table S9.Module-trait correlations between module with abiotic stresses.
Module	CK_Cd	Cd_treatment	CK_elo	CK_mat	CK_mer	NaCl_elo	NaCl_mat	NaCl_mer	CK_Zn	Zn_treatment	CK_Cu	Cu_treatment
darkorange2	-0.0255187	-0.0330118	-0.0536316	-0.0549634	0.555204	-0.0690201	-0.0381333	-0.0724884	-0.0508334	-0.0478231	-0.0237567	-0.055555
brown4	-0.0443131	-0.028226	-0.0556209	0.461501	-0.021155	-0.0533168	-0.114615	-0.0662644	0.00811342	-0.0383954	-0.0410931	-0.0378869
lightsteelblue1	-0.042748	-0.0541533	-0.0638105	-0.0588124	0.579894	-0.0482292	-0.0632389	-0.0587328	-0.0495492	-0.0363423	-0.0393579	-0.0309235
floralwhite	-0.0472287	-0.0446495	-0.0655178	-0.0719997	0.598052	-0.0659126	-0.0453302	-0.0623945	-0.0436211	-0.0282572	-0.043163	-0.0458916
skyblue3	-0.045987	-0.0680966	-0.0660728	-0.0253725	0.0180891	-0.0365081	-0.0759916	0.472612	-0.0665836	-0.0429173	-0.066839	-0.0387493
ivory	-0.0462358	-0.0600354	-0.0717737	0.472968	-0.000154176	-0.0351538	-0.0456402	-0.045692	-0.0569591	-0.0415222	-0.0584565	-0.0544131
blue	-0.0170348	-0.131952	-0.283741	0.608118	0.513151	-0.284204	-0.34018	-0.117812	-0.0461665	0.131993	0.0150978	-0.0286983
orangered4	-0.0699845	-0.0774026	-0.0800373	0.553405	-0.0191001	-0.0635637	-0.0909924	-0.03074	-0.0492449	-0.054995	-0.0489192	-0.0172987
orange	-0.000884244	0.573734	-0.0769914	-0.0861476	-0.0689589	-0.0634524	-0.0696004	-0.0698117	-0.0563006	-0.0479484	-0.00732269	0.0157356
darkgreen	-0.0247564	0.601975	-0.0783451	-0.083608	-0.0744551	-0.0680075	-0.0801279	-0.0784402	-0.0328477	-0.00453653	-0.0196395	-0.0126614
darkorange	-0.00336051	0.778639	0.20803	-0.417348	-0.351817	0.201843	-0.105733	-0.0394118	-0.0812438	-0.0755027	-0.0426422	-0.0221867
red	-0.065755	0.938143	-0.136566	-0.114411	-0.0967278	-0.126148	-0.112428	-0.121201	-0.0835243	-0.00283362	-0.0349494	0.0237552
purple	-0.0193242	-0.0117778	-0.0850584	-0.0926528	-0.0787951	-0.07075	-0.0792488	-0.0811675	-0.0400725	-0.0171536	0.0240441	0.598953
midnightblue	-0.0579747	-0.0161368	-0.0756646	-0.0887963	-0.0713108	-0.0731619	-0.067142	-0.0797577	-0.0382243	0.00113438	-0.0228445	0.633155
lightgreen	-0.0243665	-0.028845	-0.0961938	-0.0909881	-0.0795938	-0.0727028	-0.061303	-0.0845828	-0.021339	-0.0100057	-0.0172833	0.633497
green	0.0760953	0.177079	-0.251174	-0.480485	-0.41817	-0.217979	0.473726	0.0407288	0.171518	0.0569486	0.0566862	0.345215
turquoise	0.177845	0.40564	-0.340869	-0.314179	-0.270316	-0.287978	-0.151176	-0.225126	0.194808	0.255397	0.144064	0.555237
skyblue	0.591036	-0.0256877	-0.077392	-0.0854806	-0.0822313	-0.0642734	-0.0765719	-0.0688815	-0.00997006	0.00545714	-0.00131067	-0.0618399
darkolivegreen	0.574108	-0.0157373	-0.0837832	-0.0815964	-0.0682208	-0.0739791	-0.0845087	-0.0750834	0.00581147	-0.0331888	-0.008272	-0.010382
royalblue	-0.0215324	-0.0351307	-0.0925101	-0.110015	-0.0849455	-0.086717	-0.09005	-0.0944669	-0.022498	0.637439	0.0180362	0.0361855
sienna3	-0.0413383	-0.040305	-0.090689	-0.0880359	-0.0799793	-0.0652991	-0.087679	-0.0831565	-0.0269242	0.653648	0.00117406	-0.00283101
steelblue	-0.0063762	-0.0103569	-0.0944382	-0.100325	-0.0744899	-0.0818434	-0.0891503	-0.0859339	0.599115	-0.0066831	0.0191704	-0.0172838
plum1	-0.010414	-0.0397787	-0.0887253	-0.0904163	-0.0737281	-0.0640568	-0.0802067	-0.0802828	0.569579	0.0138291	0.0266502	-0.0352438
darkturquoise	-0.0109235	-0.0344783	-0.0914092	-0.0841116	-0.0649097	-0.0797517	-0.0868654	-0.085738	-0.000649288	0.593429	-0.00384272	-0.00236387
lightyellow	0.622162	-0.0278954	-0.0857692	-0.105558	-0.086377	-0.0827799	-0.0993199	-0.0897056	0.0166003	-0.0139309	0.0313049	-0.0258667
darkmagenta	0.0844855	-0.0170745	-0.119181	-0.105561	-0.100665	-0.105124	-0.121079	-0.110124	0.615192	0.0233235	0.0245551	-0.0053763
darkgrey	-0.00865688	-0.0507921	-0.0702646	-0.0986606	-0.0850807	-0.0685003	-0.0954861	-0.0803631	0.00347857	-0.00229744	0.631148	-0.026605
greenyellow	-0.0162443	-0.0501764	-0.0827259	-0.0793851	-0.0730334	-0.0658541	-0.0760645	-0.0851322	-0.0202526	-0.0239175	0.628241	-0.0105186
black	0.342129	-0.105428	-0.266557	-0.239475	-0.206557	-0.229001	-0.249356	-0.249551	0.298575	0.40341	0.584748	0.0567394
tan	0.00333554	-0.00920605	-0.127042	-0.12444	-0.113163	-0.102703	-0.116732	-0.129114	0.00171785	0.0102879	0.743817	0.032366
lightcyan	-0.0595537	-0.0260694	-0.0717022	-0.0840723	-0.0892514	-0.0504037	-0.0167448	0.47009	-0.0469576	-0.032818	-0.0432508	0.00937448
grey60	-0.0398591	-0.0610008	-0.0701432	-0.0838812	-0.0792983	-0.0470664	-0.0303144	0.522861	-0.0531031	-0.0525816	-0.0424809	-0.0101829
cyan	-0.0796848	-0.0667963	-0.0865101	-0.113293	-0.0965344	-0.068006	0.539936	-0.0191222	-0.037614	-0.0267706	-0.0243207	0.0340987
magenta	-0.091679	-0.115555	0.00270527	-0.172179	-0.159287	-0.0723742	0.61176	0.245336	-0.0766141	-0.0868765	-0.0895039	-0.0913035
yellow	-0.155405	-0.17774	0.00501078	-0.24398	-0.214821	0.0183761	0.763055	0.309867	-0.0816705	-0.156078	-0.109902	-0.0726246
pink	-0.0725423	-0.0656765	-0.0663832	-0.10531	-0.0910995	-0.0288922	0.57619	-0.0187721	-0.0513776	-0.0669141	-0.0576892	-0.00514553
salmon	-0.0809115	-0.0805817	-0.0795957	-0.180972	-0.152069	-0.0212171	0.562619	0.030247	0.0125166	-0.0623122	-0.036319	0.0424101
mediumpurple3	-0.0336434	-0.0358292	-0.0661692	-0.0596229	-0.0657402	0.555134	-0.0746755	-0.0324683	-0.0518827	-0.0420992	-0.02843	-0.0321974
yellowgreen	-0.0431376	-0.0462238	0.498	-0.0541573	-0.0494121	-0.0456515	-0.068041	-0.0712403	-0.036057	-0.0524543	-0.0469893	-0.0269661
paleturquoise	-0.055858	-0.0255844	-0.042927	-0.0827937	-0.057292	0.560448	-0.0486656	-0.057445	-0.0503054	-0.0299121	-0.0418056	-0.035637
white	-0.0750625	-0.0437101	0.504236	-0.093249	-0.0698931	-0.0122711	-0.0413217	-0.0497765	-0.067747	-0.0220822	-0.0274585	-0.0461261
saddlebrown	-0.0377282	-0.0388136	-0.00443504	-0.0834709	-0.0638383	0.574044	-0.075694	-0.0838802	-0.0513976	-0.0365954	-0.0327657	-0.0310282
brown	-0.1753	-0.20422	0.600713	-0.166582	-0.142279	0.537526	0.0814755	0.191038	-0.174239	-0.244915	-0.130648	-0.270787
darkred	-0.049936	-0.0583683	0.480668	-0.0829361	-0.0637394	0.0162704	-0.0432727	-0.0444367	-0.0377302	-0.0553035	-0.0509506	-0.0533545
lightcyan1	-0.0307516	-0.0512172	0.467082	-0.0947845	-0.063928	-0.0435245	-0.0530486	-0.0164088	-0.0333546	-0.047814	-0.0493791	-0.0249624
violet	-0.0537175	-0.0563063	-0.0459251	-0.0867213	-0.0868537	-0.0401999	-0.0345456	0.469887	-0.0443095	-0.0198217	-0.00112237	-0.042436
grey	-0.0573605	-0.0690975	-0.0250054	0.443565	-0.066758	-0.0689277	-0.0111374	-0.161174	-0.0894352	0.0728246	-0.0704582	0.0687383

## Sheet: Table S10
Table S10. Network of identified miRNA bind sites in HvOSCAs
fromNode	toNode	weight	direction	fromAltName	toAltName
HORVU.MOREX.r2HG0051150	HORVU.MOREX.r2.3HG0235200	0.68526	undirected	NA	NA
HORVU.MOREX.r2HG0051150	HORVU.MOREX.r2.5HG0411790	0.681646	undirected	NA	NA
HORVU.MOREX.r2HG0051150	HORVU.MOREX.r2.6HG0454170	0.680747	undirected	NA	NA
HORVU.MOREX.r2HG0051150	HORVU.MOREX.r2.5HG0440760	0.680718	undirected	NA	NA
HORVU.MOREX.r2HG0051150	HORVU.MOREX.r2.3HG0260540	0.680356	undirected	NA	NA
HORVU.MOREX.r2HG0051150	HORVU.MOREX.r2.4HG0278560	0.67958	undirected	NA	NA
HORVU.MOREX.r2HG0051150	HORVU.MOREX.r2HG0074490	0.674577	undirected	NA	NA
HORVU.MOREX.r2HG0051150	HORVU.MOREX.r2.2HG0118280	0.674577	undirected	NA	NA
HORVU.MOREX.r2HG0051150	HORVU.MOREX.r2.2HG0129650	0.674577	undirected	NA	NA
HORVU.MOREX.r2HG0051150	HORVU.MOREX.r2.2HG0143250	0.674577	undirected	NA	NA
HORVU.MOREX.r2HG0051150	hvu-miR156a	0.333333	undirected	NA	NA
HORVU.MOREX.r2HG0051150	hvu-miR156b	0.333333	undirected	NA	NA
HORVU.MOREX.r2HG0051150	hvu-miR6190	0.333333	undirected	NA	NA
HORVU.MOREX.r2HG0042080	HORVU.MOREX.r2.4HG0348370	0.394701	undirected	NA	NA
HORVU.MOREX.r2HG0042080	HORVU.MOREX.r2.4HG0277870	0.393788	undirected	NA	NA
HORVU.MOREX.r2HG0042080	HORVU.MOREX.r2.4HG0281880	0.393483	undirected	NA	NA
HORVU.MOREX.r2HG0042080	HORVU.MOREX.r2.2HG0092530	0.392143	undirected	NA	NA
HORVU.MOREX.r2HG0042080	HORVU.MOREX.r2.3HG0223010	0.391847	undirected	NA	NA
HORVU.MOREX.r2HG0042080	HORVU.MOREX.r2.2HG0156970	0.388058	undirected	NA	NA
HORVU.MOREX.r2HG0042080	HORVU.MOREX.r2.7HG0611650	0.379747	undirected	NA	NA
HORVU.MOREX.r2HG0042080	HORVU.MOREX.r2.3HG0245450	0.379068	undirected	NA	NA
HORVU.MOREX.r2HG0042080	HORVU.MOREX.r2.6HG0509160	0.377023	undirected	NA	NA
HORVU.MOREX.r2HG0042080	HORVU.MOREX.r2.4HG0343430	0.374228	undirected	NA	NA
HORVU.MOREX.r2HG0005560	HORVU.MOREX.r2.5HG0376740	0.52626	undirected	NA	NA
HORVU.MOREX.r2HG0005560	HORVU.MOREX.r2.2HG0095540	0.525598	undirected	NA	NA
HORVU.MOREX.r2HG0005560	HORVU.MOREX.r2.3HG0237090	0.522175	undirected	NA	NA
HORVU.MOREX.r2HG0005560	HORVU.MOREX.r2.6HG0523600	0.521511	undirected	NA	NA
HORVU.MOREX.r2HG0005560	HORVU.MOREX.r2HG0019110	0.520016	undirected	NA	NA
HORVU.MOREX.r2HG0005560	HORVU.MOREX.r2.3HG0233730	0.519284	undirected	NA	NA
HORVU.MOREX.r2HG0005560	HORVU.MOREX.r2.7HG0534530	0.518778	undirected	NA	NA
HORVU.MOREX.r2HG0005560	HORVU.MOREX.r2.2HG0137270	0.518714	undirected	NA	NA
HORVU.MOREX.r2HG0005560	HORVU.MOREX.r2.4HG0343460	0.51866	undirected	NA	NA
HORVU.MOREX.r2HG0005560	HORVU.MOREX.r2.6HG0488990	0.518487	undirected	NA	NA
HORVU.MOREX.r2HG0005560	hvu-miR6195	0.3	undirected	NA	NA
HORVU.MOREX.r2HG0005560	hvu-miR6206	0.333333	undirected	NA	NA
HORVU.MOREX.r2.5HG0363570	HORVU.MOREX.r2.7HG0535060	0.354332	undirected	NA	NA
HORVU.MOREX.r2.5HG0363570	HORVU.MOREX.r2.6HG0497230	0.329536	undirected	NA	NA
HORVU.MOREX.r2.5HG0363570	HORVU.MOREX.r2.7HG0579740	0.320953	undirected	NA	NA
HORVU.MOREX.r2.5HG0363570	HORVU.MOREX.r2.6HG0478730	0.319727	undirected	NA	NA
HORVU.MOREX.r2.5HG0363570	HORVU.MOREX.r2.6HG0505700	0.318449	undirected	NA	NA
HORVU.MOREX.r2.5HG0363570	HORVU.MOREX.r2.7HG0551930	0.309682	undirected	NA	NA
HORVU.MOREX.r2.5HG0363570	HORVU.MOREX.r2.6HG0462450	0.301736	undirected	NA	NA
HORVU.MOREX.r2.5HG0363570	HORVU.MOREX.r2.7HG0604200	0.299731	undirected	NA	NA
HORVU.MOREX.r2.5HG0363570	HORVU.MOREX.r2.5HG0426180	0.298843	undirected	NA	NA
HORVU.MOREX.r2.5HG0363570	HORVU.MOREX.r2.5HG0393760	0.292449	undirected	NA	NA
HORVU.MOREX.r2.5HG0363570	hvu-miR5049f	0.333333	undirected	NA	NA
HORVU.MOREX.r2.5HG0363570	hvu-miR6195	0.333333	undirected	NA	NA
HORVU.MOREX.r2.5HG0350450	HORVU.MOREX.r2.6HG0481310	0.367019	undirected	NA	NA
HORVU.MOREX.r2.5HG0350450	HORVU.MOREX.r2.6HG0453840	0.362901	undirected	NA	NA
HORVU.MOREX.r2.5HG0350450	HORVU.MOREX.r2.7HG0572580	0.361516	undirected	NA	NA
HORVU.MOREX.r2.5HG0350450	HORVU.MOREX.r2.5HG0416920	0.358873	undirected	NA	NA
HORVU.MOREX.r2.5HG0350450	HORVU.MOREX.r2.5HG0437670	0.352522	undirected	NA	NA
HORVU.MOREX.r2.5HG0350450	HORVU.MOREX.r2.5HG0385560	0.349605	undirected	NA	NA
HORVU.MOREX.r2.5HG0350450	HORVU.MOREX.r2.7HG0592660	0.349361	undirected	NA	NA
HORVU.MOREX.r2.5HG0350450	HORVU.MOREX.r2.5HG0408010	0.348404	undirected	NA	NA
HORVU.MOREX.r2.5HG0350450	HORVU.MOREX.r2.5HG0377220	0.34805	undirected	NA	NA
HORVU.MOREX.r2.5HG0350450	HORVU.MOREX.r2.6HG0464020	0.347529	undirected	NA	NA
HORVU.MOREX.r2.5HG0350450	hvu-miR6196	0.333333	undirected	NA	NA
HORVU.MOREX.r2.5HG0350440	HORVU.MOREX.r2.5HG0396640	0.378496	undirected	NA	NA
HORVU.MOREX.r2.5HG0350440	HORVU.MOREX.r2.7HG0576580	0.378205	undirected	NA	NA
HORVU.MOREX.r2.5HG0350440	HORVU.MOREX.r2.6HG0491320	0.372174	undirected	NA	NA
HORVU.MOREX.r2.5HG0350440	HORVU.MOREX.r2.5HG0365770	0.369285	undirected	NA	NA
HORVU.MOREX.r2.5HG0350440	HORVU.MOREX.r2.7HG0618800	0.367879	undirected	NA	NA
HORVU.MOREX.r2.5HG0350440	HORVU.MOREX.r2.6HG0489660	0.361547	undirected	NA	NA
HORVU.MOREX.r2.5HG0350440	HORVU.MOREX.r2.5HG0363290	0.359847	undirected	NA	NA
HORVU.MOREX.r2.5HG0350440	HORVU.MOREX.r2.5HG0427520	0.356743	undirected	NA	NA
HORVU.MOREX.r2.5HG0350440	HORVU.MOREX.r2.7HG0576290	0.355505	undirected	NA	NA
HORVU.MOREX.r2.5HG0350440	HORVU.MOREX.r2.6HG0464740	0.351395	undirected	NA	NA
HORVU.MOREX.r2.4HG0278490	HORVU.MOREX.r2.5HG0391750	0.301434	undirected	NA	NA
HORVU.MOREX.r2.4HG0278490	HORVU.MOREX.r2.6HG0497230	0.299534	undirected	NA	NA
HORVU.MOREX.r2.4HG0278490	HORVU.MOREX.r2.7HG0535060	0.2974	undirected	NA	NA
HORVU.MOREX.r2.4HG0278490	HORVU.MOREX.r2.6HG0478730	0.288413	undirected	NA	NA
HORVU.MOREX.r2.4HG0278490	HORVU.MOREX.r2.6HG0505700	0.284417	undirected	NA	NA
HORVU.MOREX.r2.4HG0278490	HORVU.MOREX.r2.6HG0526850	0.276134	undirected	NA	NA
HORVU.MOREX.r2.4HG0278490	HORVU.MOREX.r2.4HG0335940	0.27397	undirected	NA	NA
HORVU.MOREX.r2.4HG0278490	HORVU.MOREX.r2.5HG0383520	0.269661	undirected	NA	NA
HORVU.MOREX.r2.4HG0278490	HORVU.MOREX.r2.4HG0303280	0.266504	undirected	NA	NA
HORVU.MOREX.r2.4HG0278490	HORVU.MOREX.r2.7HG0551930	0.264805	undirected	NA	NA
HORVU.MOREX.r2.4HG0278490	hvu-miR6205	0.333333	undirected	NA	NA
HORVU.MOREX.r2.3HG0218160	HORVU.MOREX.r2.5HG0427890	0.410308	undirected	NA	NA
HORVU.MOREX.r2.3HG0218160	HORVU.MOREX.r2.3HG0230700	0.405671	undirected	NA	NA
HORVU.MOREX.r2.3HG0218160	HORVU.MOREX.r2.6HG0488480	0.404866	undirected	NA	NA
HORVU.MOREX.r2.3HG0218160	HORVU.MOREX.r2.5HG0397940	0.403686	undirected	NA	NA
HORVU.MOREX.r2.3HG0218160	HORVU.MOREX.r2.7HG0540240	0.402765	undirected	NA	NA
HORVU.MOREX.r2.3HG0218160	HORVU.MOREX.r2.6HG0472000	0.402051	undirected	NA	NA
HORVU.MOREX.r2.3HG0218160	HORVU.MOREX.r2.7HG0542740	0.401676	undirected	NA	NA
HORVU.MOREX.r2.3HG0218160	HORVU.MOREX.r2.4HG0335370	0.401676	undirected	NA	NA
HORVU.MOREX.r2.3HG0218160	HORVU.MOREX.r2.7HG0618110	0.397435	undirected	NA	NA
HORVU.MOREX.r2.3HG0218160	HORVU.MOREX.r2.5HG0401950	0.397366	undirected	NA	NA
HORVU.MOREX.r2.3HG0218160	hvu-miR5049f	0.333333	undirected	NA	NA
HORVU.MOREX.r2.3HG0218160	hvu-miR6202	0.333333	undirected	NA	NA
HORVU.MOREX.r2.3HG0218160	hvu-miR6203	0.333333	undirected	NA	NA
HORVU.MOREX.r2.2HG0129010	HORVU.MOREX.r2.2HG0156970	0.410148	undirected	NA	NA
HORVU.MOREX.r2.2HG0129010	HORVU.MOREX.r2.4HG0348370	0.403184	undirected	NA	NA
HORVU.MOREX.r2.2HG0129010	HORVU.MOREX.r2.4HG0277870	0.398402	undirected	NA	NA
HORVU.MOREX.r2.2HG0129010	HORVU.MOREX.r2.4HG0343430	0.391312	undirected	NA	NA
HORVU.MOREX.r2.2HG0129010	HORVU.MOREX.r2.7HG0611650	0.39115	undirected	NA	NA
HORVU.MOREX.r2.2HG0129010	HORVU.MOREX.r2.3HG0223010	0.38886	undirected	NA	NA
HORVU.MOREX.r2.2HG0129010	HORVU.MOREX.r2.4HG0281880	0.388331	undirected	NA	NA
HORVU.MOREX.r2.2HG0129010	HORVU.MOREX.r2.7HG0529240	0.385728	undirected	NA	NA
HORVU.MOREX.r2.2HG0129010	HORVU.MOREX.r2.6HG0509160	0.384297	undirected	NA	NA
HORVU.MOREX.r2.2HG0129010	HORVU.MOREX.r2.6HG0495140	0.38359	undirected	NA	NA
HORVU.MOREX.r2.2HG0129010	HORVU.MOREX.r2.2HG0156970	0.50556	undirected	NA	NA
HORVU.MOREX.r2.2HG0129010	HORVU.MOREX.r2.7HG0556520	0.500878	undirected	NA	NA
HORVU.MOREX.r2.2HG0129010	HORVU.MOREX.r2.4HG0339210	0.489333	undirected	NA	NA
HORVU.MOREX.r2.2HG0129010	HORVU.MOREX.r2.7HG0529240	0.48882	undirected	NA	NA
HORVU.MOREX.r2.2HG0129010	HORVU.MOREX.r2.5HG0435880	0.486814	undirected	NA	NA
HORVU.MOREX.r2.2HG0129010	HORVU.MOREX.r2.3HG0195250	0.486722	undirected	NA	NA
HORVU.MOREX.r2.2HG0129010	HORVU.MOREX.r2.4HG0343430	0.485781	undirected	NA	NA
HORVU.MOREX.r2.2HG0129010	HORVU.MOREX.r2.7HG0611650	0.482741	undirected	NA	NA
HORVU.MOREX.r2.2HG0129010	HORVU.MOREX.r2.3HG0245450	0.482542	undirected	NA	NA
HORVU.MOREX.r2.2HG0129010	HORVU.MOREX.r2.3HG0214080	0.481349	undirected	NA	NA
HORVU.MOREX.r2.2HG0129010	hvu-miR6206	0.333333	undirected	NA	NA
HORVU.MOREX.r2.2HG0126160	HORVU.MOREX.r2.4HG0335530	0.404377	undirected	NA	NA
HORVU.MOREX.r2.2HG0126160	HORVU.MOREX.r2.6HG0453840	0.387571	undirected	NA	NA
HORVU.MOREX.r2.2HG0126160	HORVU.MOREX.r2.6HG0467930	0.386727	undirected	NA	NA
HORVU.MOREX.r2.2HG0126160	HORVU.MOREX.r2.7HG0572580	0.385764	undirected	NA	NA
HORVU.MOREX.r2.2HG0126160	HORVU.MOREX.r2.5HG0408010	0.383707	undirected	NA	NA
HORVU.MOREX.r2.2HG0126160	HORVU.MOREX.r2.4HG0297140	0.382491	undirected	NA	NA
HORVU.MOREX.r2.2HG0126160	HORVU.MOREX.r2.3HG0235650	0.379933	undirected	NA	NA
HORVU.MOREX.r2.2HG0126160	HORVU.MOREX.r2.4HG0339370	0.379907	undirected	NA	NA
HORVU.MOREX.r2.2HG0126160	HORVU.MOREX.r2.3HG0206960	0.379704	undirected	NA	NA
HORVU.MOREX.r2.2HG0126160	HORVU.MOREX.r2.5HG0416920	0.37936	undirected	NA	NA
HORVU.MOREX.r2.2HG0126160	HORVU.MOREX.r2.5HG0414380	0.355402	undirected	NA	NA
HORVU.MOREX.r2.2HG0126160	HORVU.MOREX.r2.4HG0318600	0.347784	undirected	NA	NA
HORVU.MOREX.r2.2HG0126160	HORVU.MOREX.r2.5HG0439100	0.334161	undirected	NA	NA
HORVU.MOREX.r2.2HG0126160	HORVU.MOREX.r2.3HG0211850	0.330523	undirected	NA	NA
HORVU.MOREX.r2.2HG0126160	HORVU.MOREX.r2.5HG0421990	0.322653	undirected	NA	NA
HORVU.MOREX.r2.2HG0126160	HORVU.MOREX.r2.7HG0617130	0.317945	undirected	NA	NA
HORVU.MOREX.r2.2HG0126160	HORVU.MOREX.r2.4HG0320260	0.317166	undirected	NA	NA
HORVU.MOREX.r2.2HG0126160	HORVU.MOREX.r2.3HG0251960	0.312459	undirected	NA	NA
HORVU.MOREX.r2.2HG0126160	HORVU.MOREX.r2.5HG0437420	0.310658	undirected	NA	NA
HORVU.MOREX.r2.2HG0126160	HORVU.MOREX.r2.4HG0326830	0.309576	undirected	NA	NA
HORVU.MOREX.r2.2HG0126160	hvu-miR6184	0.3	undirected	NA	NA
HORVU.MOREX.r2.2HG0126160	hvu-miR6198	0.333333	undirected	NA	NA
HORVU.MOREX.r2.2HG0126160	hvu-miR6204	0.333333	undirected	NA	NA
HORVU.MOREX.r2.2HG0126160	hvu-miR6204	0.333333	undirected	NA	NA

[truncated: 5 more sheets: Table S11, Table S12, Table S13, Table S14, Table S15]
