# Supplementary figures and images for: Genome-Wide Identification, Evolution and Expressional Analysis of OSCA Gene Family in Barley (Hordeum vulgare L.)
Source: MDPI journal article supplement (doi:10.3390/ijms232113027), 2022-10-27

Module-trait relationships

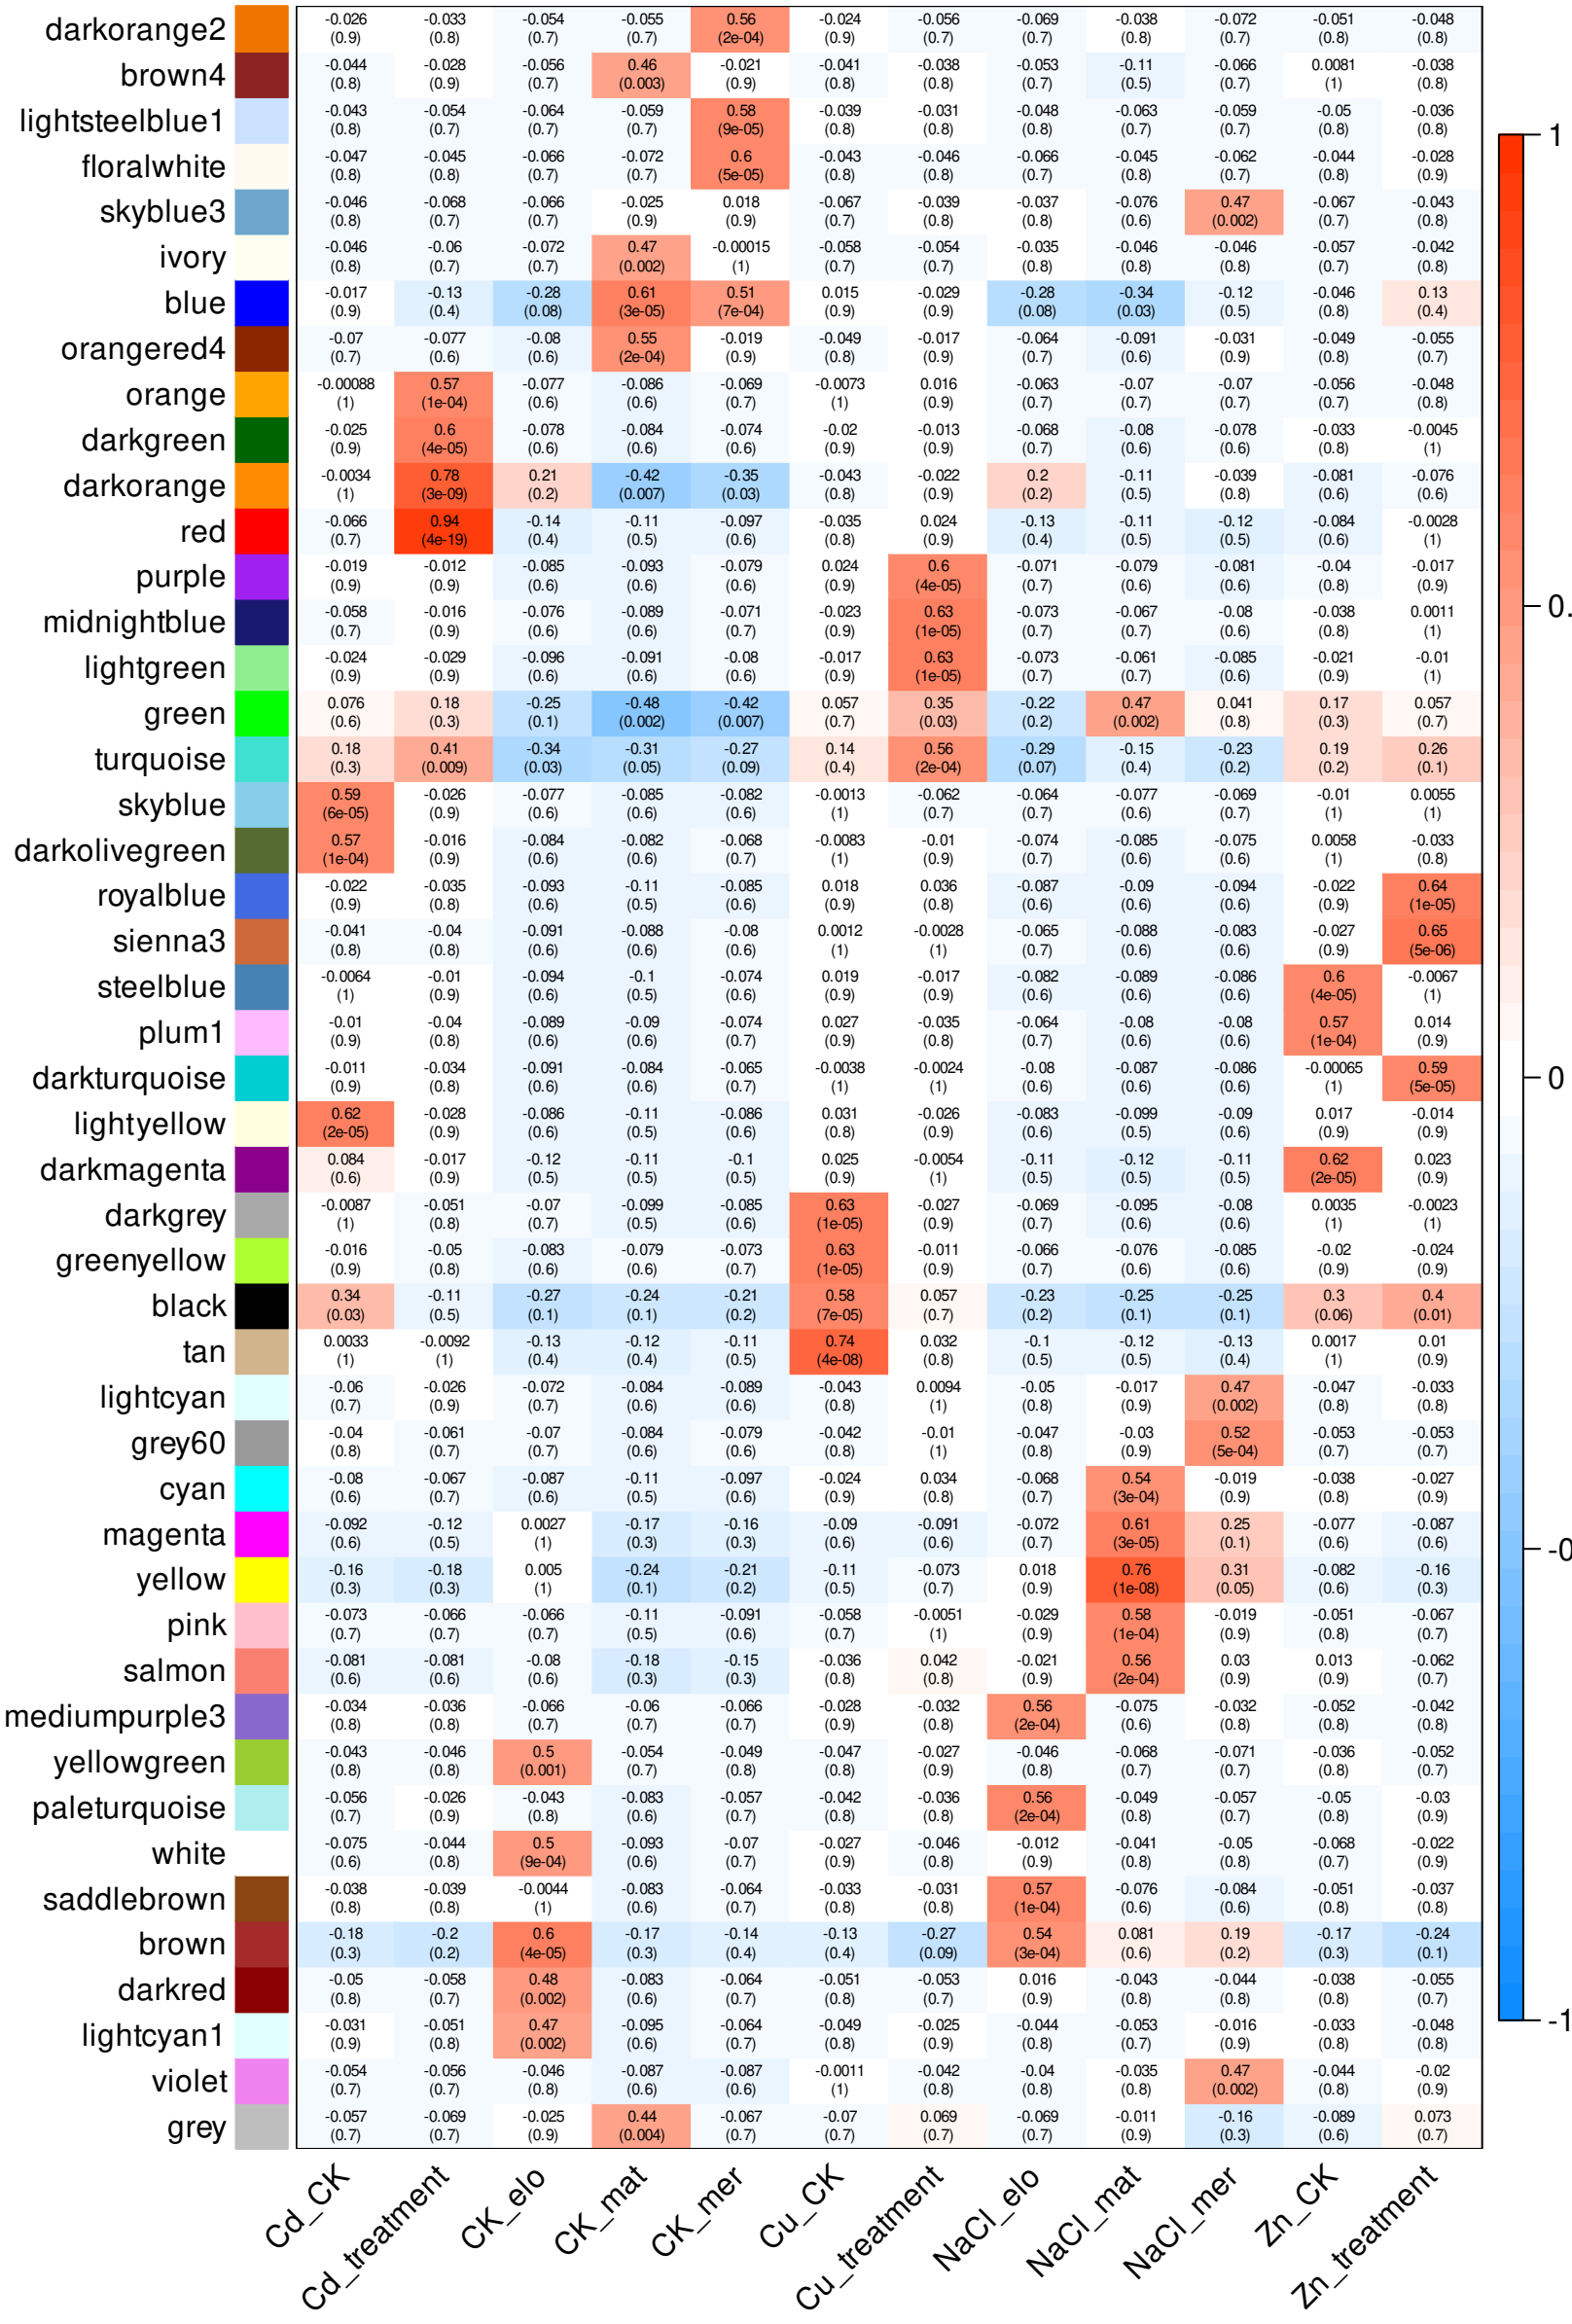

Supplement: s1 [file s1]

# Cluster Dendrogram

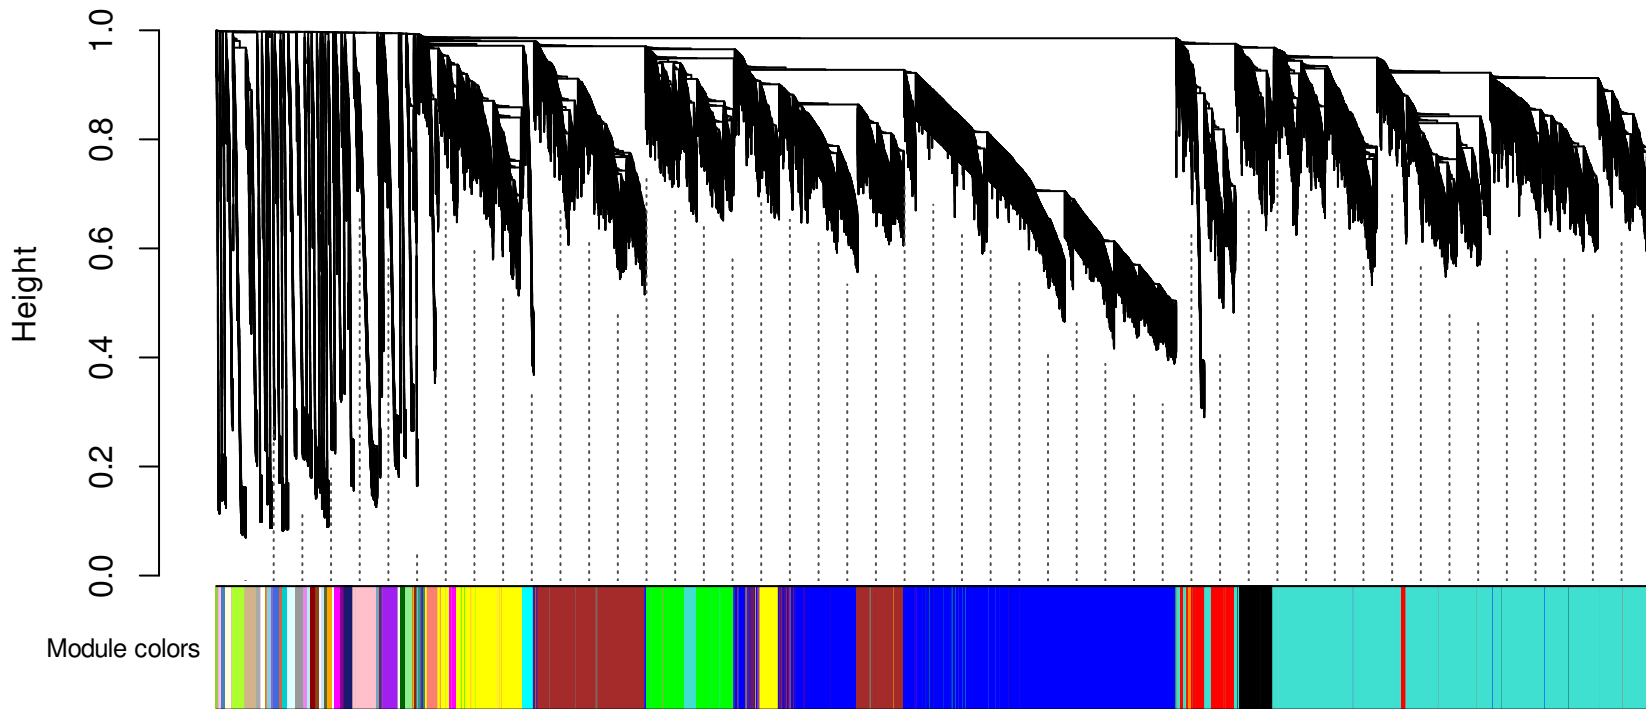

Supplement: s1 [file s1]

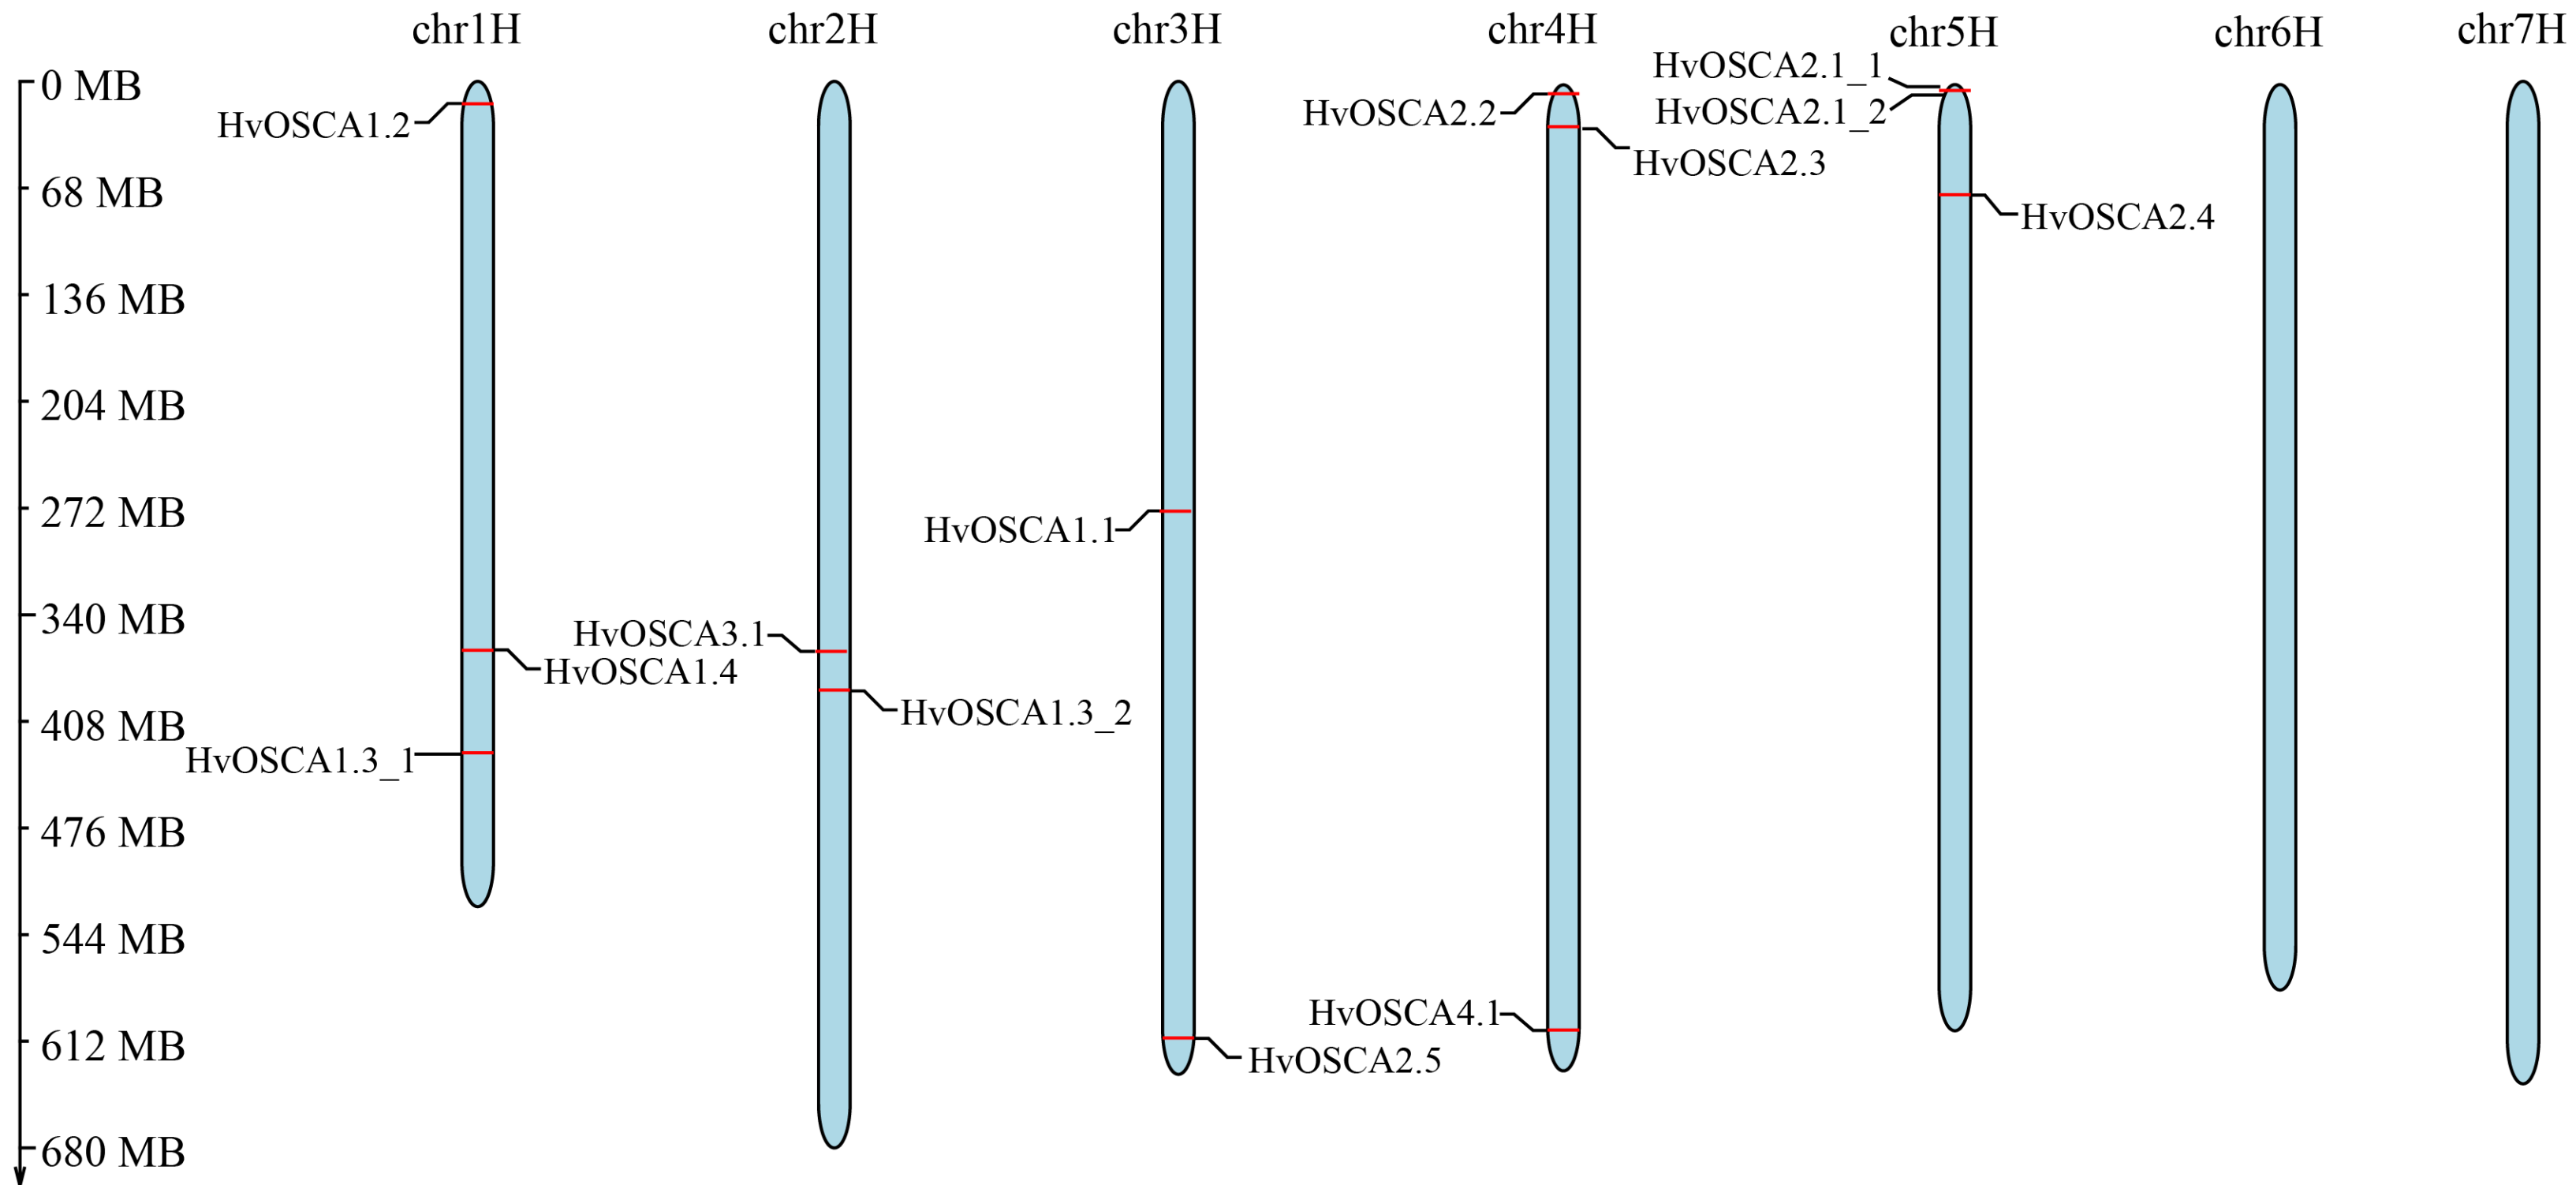

Supplement: s1 [file s1]

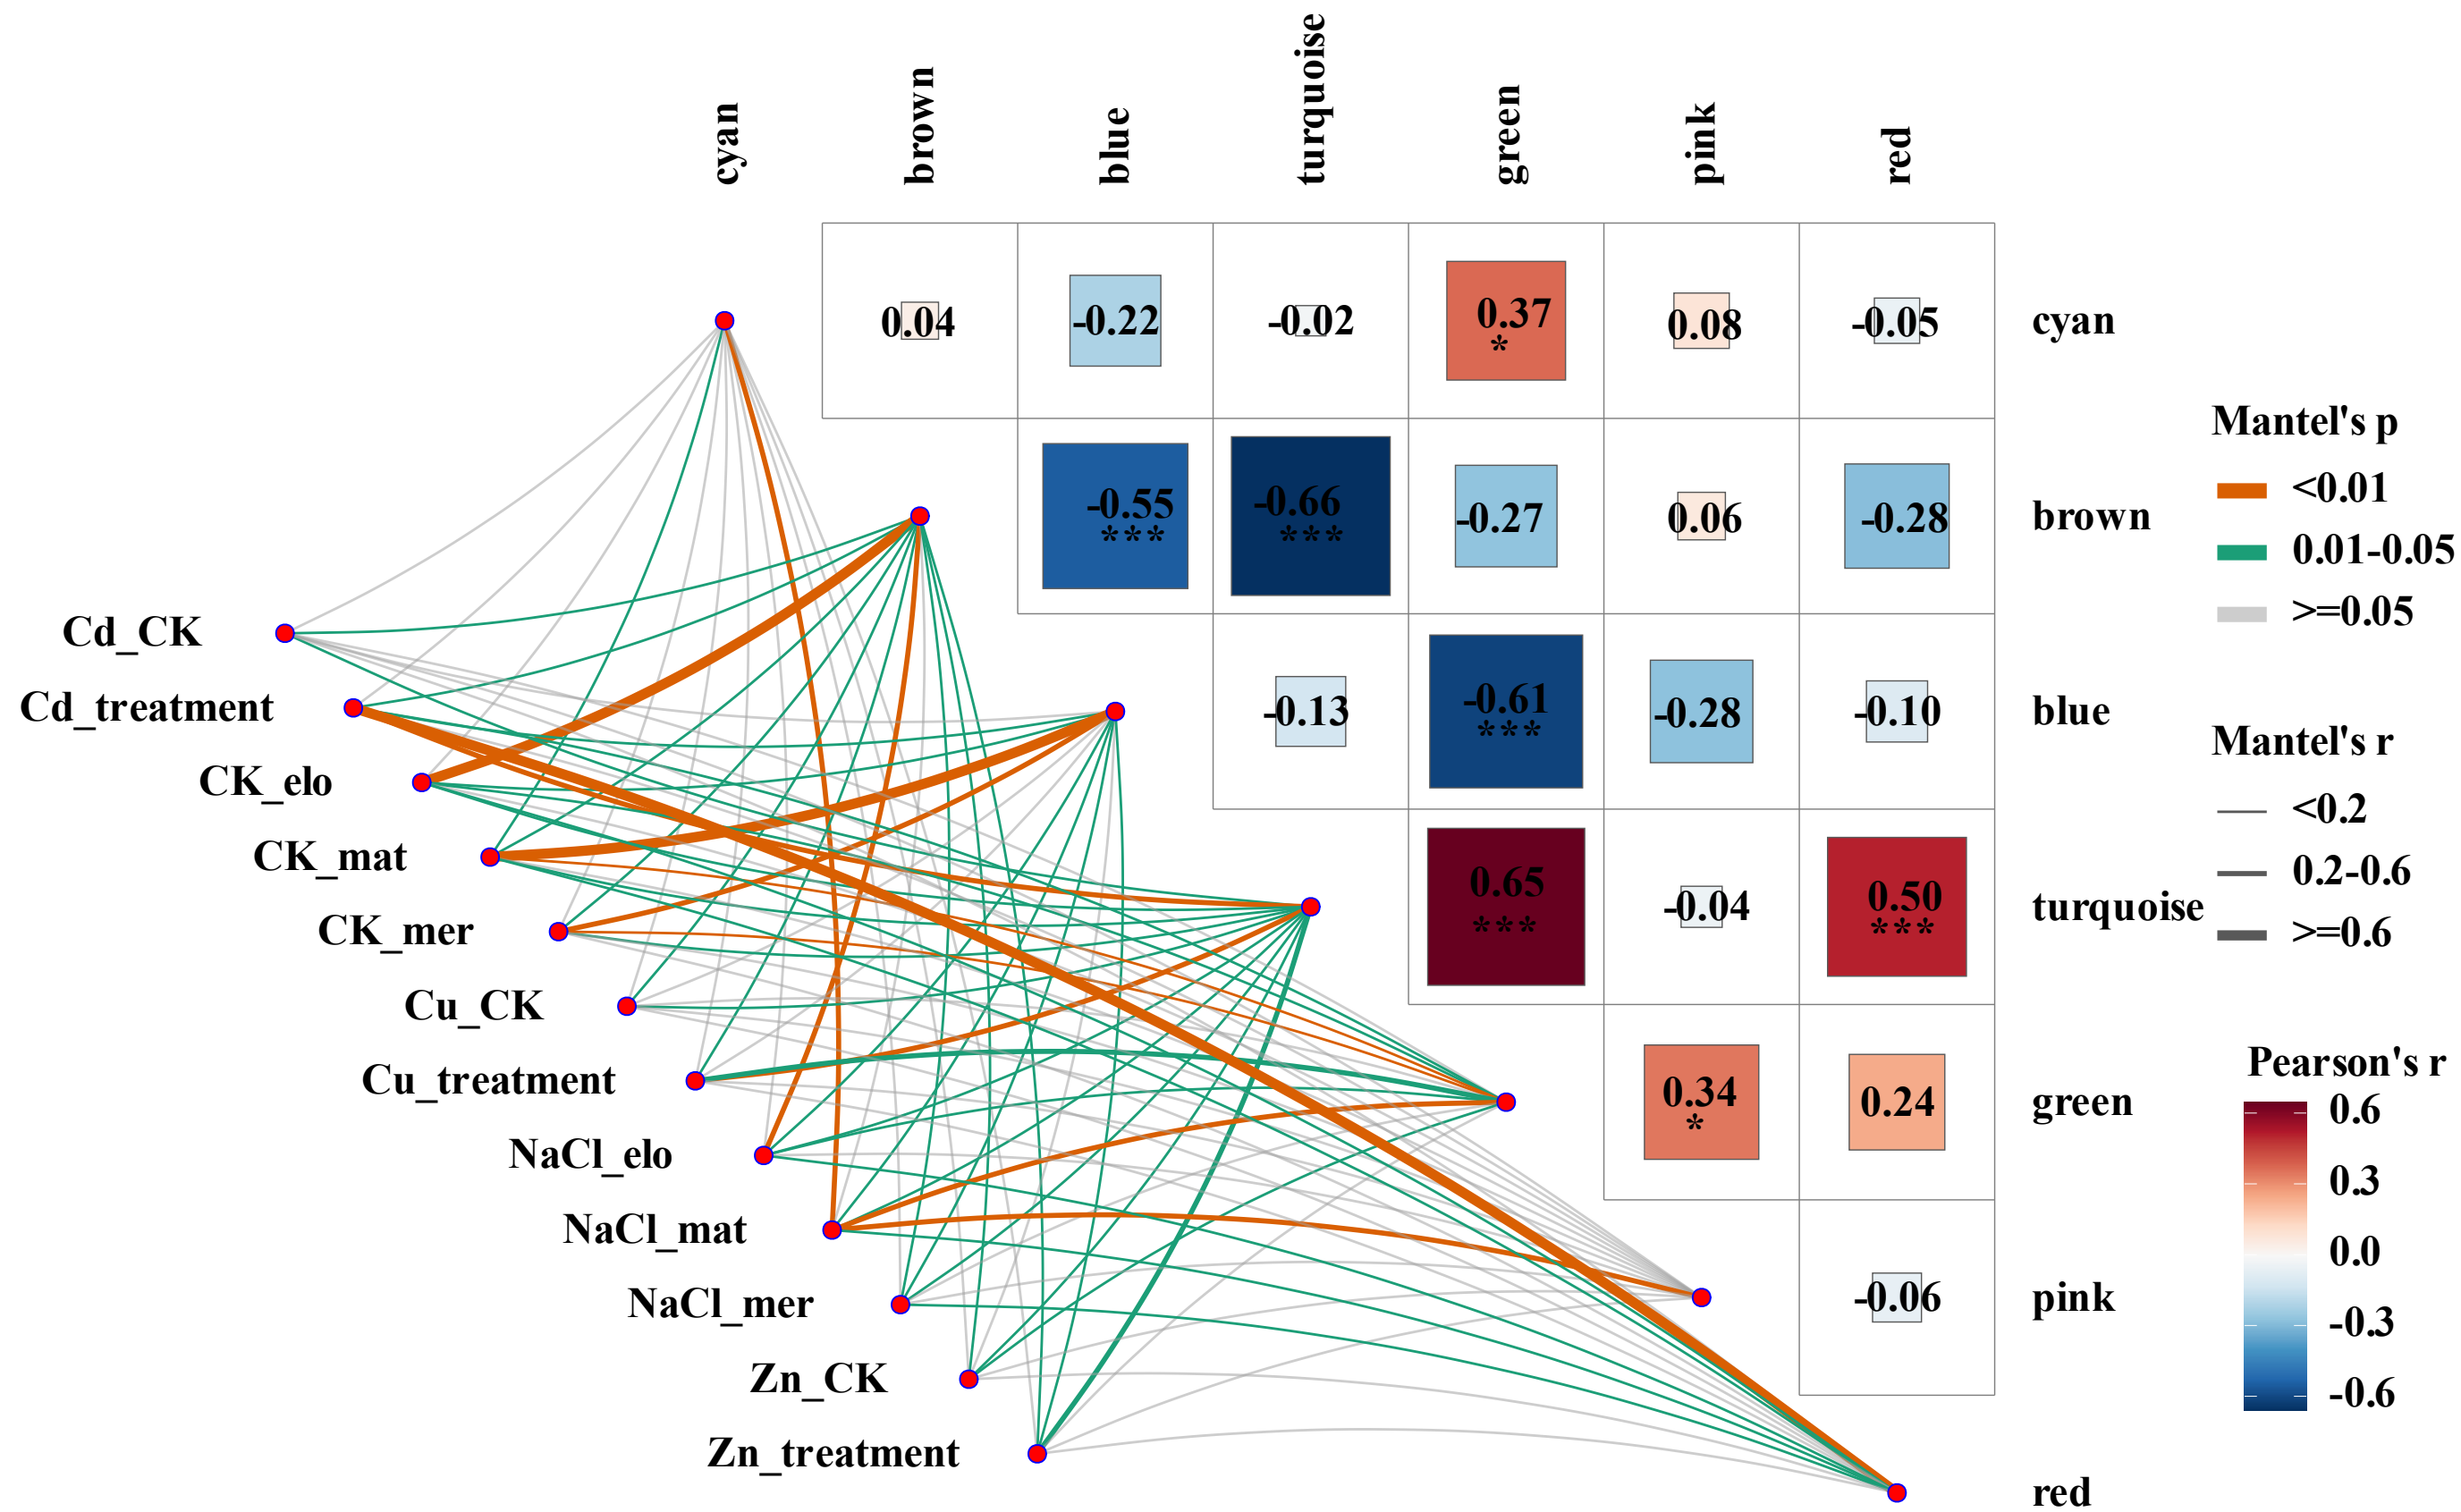

Supplement: s1 [file s1]
